# Supplementary material for: Molecular karyotyping by array CGH in a Russian cohort of children with intellectual disability, autism, epilepsy and congenital anomalies
Source: PubMed Central journal article supplement (PMC3547809; doi:10.1186/1755-8166-5-46), 2012-12-31
Supplement: 1755-8166-5-46-S1.pdf [file 1755-8166-5-46-S1.pdf]

### Genes affected by chromosome imbalances and CNVs

(numerical constitutional and mosaic chromosome abnormalities excluded)

(**RED** — deleted genes; **BLUE** — duplicated genes)

| Patient # | Loci                 | Aberration type | Gene   | OMIM, # | Function                                                                                                                                                                                                                                                                                                                                                       | Disease                                                                |
|-----------|----------------------|-----------------|--------|---------|----------------------------------------------------------------------------------------------------------------------------------------------------------------------------------------------------------------------------------------------------------------------------------------------------------------------------------------------------------------|------------------------------------------------------------------------|
| 1         | <b>1p36.32p36.22</b> | <b>deletion</b> | NPHP4  | 607 215 | This gene encodes a protein involved in renal tubular development and function.                                                                                                                                                                                                                                                                                | Nephronophthisis type 4, a renal disease, Senior-Loken syndrome type 4 |
|           |                      |                 | KCNAB2 | 601 142 | Voltage-gated potassium (Kv) channels represent the most complex class of voltage-gated ion channels from both functional and structural standpoints. Their diverse functions include regulating neurotransmitter release, heart rate, insulin secretion, neuronal excitability, epithelial electrolyte transport, smooth muscle contraction, and cell volume. |                                                                        |
|           |                      |                 | CHD5   | 610 771 | This gene encodes a neuron-specific                                                                                                                                                                                                                                                                                                                            |                                                                        |

|  |  |  |       |                                                                                                                                                                                                  |                                                                                                                                                                                                                                                                                                                         |
|--|--|--|-------|--------------------------------------------------------------------------------------------------------------------------------------------------------------------------------------------------|-------------------------------------------------------------------------------------------------------------------------------------------------------------------------------------------------------------------------------------------------------------------------------------------------------------------------|
|  |  |  |       | <p>protein that may function in chromatin remodeling and gene transcription.</p> <p>This gene is a potential tumor suppressor gene that may play a role in the development of neuroblastoma.</p> |                                                                                                                                                                                                                                                                                                                         |
|  |  |  | RPL22 | 180 474                                                                                                                                                                                          | <p>This gene encodes a cytoplasmic ribosomal protein that is a component of the 60S subunit. The protein belongs to the L22E family of ribosomal proteins. Its initiating methionine residue is post-translationally removed. The protein can bind specifically to Epstein-Barr virus-encoded RNAs (EBERs) 1 and 2.</p> |
|  |  |  | ICMT  | 605 851                                                                                                                                                                                          | <p>This gene encodes the third of three enzymes that posttranslationally modify isoprenylated C-terminal cysteine residues in certain proteins and target those proteins to the cell membrane. This enzyme localizes to</p>                                                                                             |

|  |  |  |       |         |                                                                                                                                                                                                                                                     |  |
|--|--|--|-------|---------|-----------------------------------------------------------------------------------------------------------------------------------------------------------------------------------------------------------------------------------------------------|--|
|  |  |  |       |         | the endoplasmic reticulum.                                                                                                                                                                                                                          |  |
|  |  |  | HES3  | 609 971 | This deduced 186-amino acid protein contains an N-terminal basic helix-loop-helix domain, followed by an orange domain, a proline-rich domain, and a C-terminal WRPW motif.                                                                         |  |
|  |  |  | ACOT7 | 602 587 | This gene encodes a member of the acyl coenzyme family. The encoded protein hydrolyzes the CoA thioester of palmitoyl-CoA and other long-chain fatty acids. Decreased expression of this gene may be associated with mesial temporal lobe epilepsy. |  |
|  |  |  | HES2  | 609 970 | This deduced 173-amino acid protein contains an N-terminal basic helix-loop-helix domain, followed by an orange domain, a proline-rich domain, and a C-terminal WRPW motif. HES2 ESTs were found in a placenta cDNA library and in several          |  |

|  |  |  |          |         |                                                                                                                                                                                                                                                                                                                          |                                                                                                              |
|--|--|--|----------|---------|--------------------------------------------------------------------------------------------------------------------------------------------------------------------------------------------------------------------------------------------------------------------------------------------------------------------------|--------------------------------------------------------------------------------------------------------------|
|  |  |  |          |         | cancer cDNA libraries.                                                                                                                                                                                                                                                                                                   |                                                                                                              |
|  |  |  | ESPN     | 606 351 | <p>This gene encodes a multifunctional actin-bundling protein. It plays a major role in regulating the organization, dimensions, dynamics, and signaling capacities of the actin filament-rich, microvillus-type specializations that mediate sensory transduction in various mechanosensory and chemosensory cells.</p> | Deafness, autosomal recessive 36; deafness, neurosensory, without vestibular involvement, autosomal dominant |
|  |  |  | TNFRSF25 | 603 366 | <p>This receptor has been shown to stimulate NF-kappa B activity and regulate cell apoptosis. The signal transduction of this receptor is mediated by various death domain containing adaptor proteins.</p>                                                                                                              |                                                                                                              |
|  |  |  | PLEKHG5  | 611 101 | <p>This gene encodes a protein that activates the nuclear factor kappa B (NFKB1) signaling pathway.</p>                                                                                                                                                                                                                  | Spinal muscular atrophy, distal, autosomal recessive, 4                                                      |
|  |  |  | TAS1R1   | 606 225 | Multiple transcript variants encoding                                                                                                                                                                                                                                                                                    |                                                                                                              |

|  |  |  |        |         |                                                                                                                                                                                                                                     |  |
|--|--|--|--------|---------|-------------------------------------------------------------------------------------------------------------------------------------------------------------------------------------------------------------------------------------|--|
|  |  |  |        |         | different isoforms have been found for this gene.                                                                                                                                                                                   |  |
|  |  |  | ZBTB48 | 165 270 | zinc finger and BTB domain containing 48                                                                                                                                                                                            |  |
|  |  |  | THAP3  | 612 532 | THAP domain containing, apoptosis associated protein 3                                                                                                                                                                              |  |
|  |  |  | CAMTA1 | 611 501 | Calmodulin binding transcription activator 1                                                                                                                                                                                        |  |
|  |  |  | VAMP3  | 603 657 | The protein encoded by this gene was shown to be the human equivalent of the rodent cellubrevin. In platelets the protein resides on a compartment that is not mobilized to the plasma membrane on calcium or thrombin stimulation. |  |
|  |  |  | PER3   | 603 427 | This gene is a member of the Period family of genes and is expressed in a circadian pattern in the suprachiasmatic nucleus, the primary circadian pacemaker in the mammalian brain.                                                 |  |

|  |  |  |      |                                                                                                                                                                                                                                                                                                                                                                                     |                                                                                                                                                                                                                                                                                                                                               |
|--|--|--|------|-------------------------------------------------------------------------------------------------------------------------------------------------------------------------------------------------------------------------------------------------------------------------------------------------------------------------------------------------------------------------------------|-----------------------------------------------------------------------------------------------------------------------------------------------------------------------------------------------------------------------------------------------------------------------------------------------------------------------------------------------|
|  |  |  |      | <p>Genes in this family encode components of the circadian rhythms of locomotor activity, metabolism, and behavior. Circadian expression in the suprachiasmatic nucleus continues in constant darkness, and a shift in the light/dark cycle evokes a proportional shift of gene expression in the suprachiasmatic nucleus. The specific function of this gene is not yet known.</p> |                                                                                                                                                                                                                                                                                                                                               |
|  |  |  | UTS2 | 604 097                                                                                                                                                                                                                                                                                                                                                                             | <p>The protein encoded by this gene is a member of the TNF-receptor superfamily. This receptor contributes to the clonal expansion, survival, and development of T cells. It can also induce proliferation in peripheral monocytes, enhance T cell apoptosis induced by TCR/CD3 triggered activation, and regulate CD28 co-stimulation to</p> |

|  |  |  |         |         |                                                                                                                                                                                                                                                                                                                                   |                                                                                                                                            |
|--|--|--|---------|---------|-----------------------------------------------------------------------------------------------------------------------------------------------------------------------------------------------------------------------------------------------------------------------------------------------------------------------------------|--------------------------------------------------------------------------------------------------------------------------------------------|
|  |  |  |         |         | promote Th1 cell responses.                                                                                                                                                                                                                                                                                                       |                                                                                                                                            |
|  |  |  | TNFRSF9 | 602 250 | <p>The product of this gene belongs to the peptidase C56 family of proteins. It acts as a positive regulator of androgen receptor-dependent transcription. It may also function as a redox-sensitive chaperone, as a sensor for oxidative stress, and it apparently protects neurons against oxidative stress and cell death.</p> |                                                                                                                                            |
|  |  |  | PARK7   | 602 533 | <p>The product of this gene belongs to the peptidase C56 family of proteins. It acts as a positive regulator of androgen receptor-dependent transcription. It may also function as a redox-sensitive chaperone, as a sensor for oxidative stress, and it apparently protects neurons against oxidative stress and cell death.</p> | <p>Amyotrophic lateral sclerosis-<br/>Parkinsonism/dementia<br/>complex 2 Parkinson<br/>disease 7, autosomal<br/>recessive early-onset</p> |
|  |  |  | ERRFI1  | 608 069 | ERRFI1 is a cytoplasmic protein whose expression is upregulated with                                                                                                                                                                                                                                                              |                                                                                                                                            |

|  |  |  |         |         |                                                                                                                                                                                                                                                |                    |
|--|--|--|---------|---------|------------------------------------------------------------------------------------------------------------------------------------------------------------------------------------------------------------------------------------------------|--------------------|
|  |  |  |         |         | cell growth. It shares significant homology with the protein product of rat gene-33, which is induced during cell stress and mediates cell signaling                                                                                           |                    |
|  |  |  | SLC45A1 | 605 763 | unknown                                                                                                                                                                                                                                        |                    |
|  |  |  | RERE    | 605 226 | This gene encodes a member of the atrophin family of arginine-glutamic acid (RE) dipeptide repeat-containing proteins. The encoded protein co-localizes with a transcription factor in the nucleus, and its overexpression triggers apoptosis. |                    |
|  |  |  | ENO1    | 172 430 | This gene encodes alpha-enolase, one of three enolase isoenzymes found in mammals.                                                                                                                                                             | Enolase deficiency |
|  |  |  | CA6     | 114 780 | The protein encoded by this gene is one of several isozymes of carbonic anhydrase. This protein is found only in salivary glands and saliva and protein may play a role in the                                                                 |                    |



|  |  |  |        |         |                                                                                                                                                                                                                                                 |                                |
|--|--|--|--------|---------|-------------------------------------------------------------------------------------------------------------------------------------------------------------------------------------------------------------------------------------------------|--------------------------------|
|  |  |  |        |         | reversible hydration of carbon dioxide though its function in saliva is unknown.                                                                                                                                                                |                                |
|  |  |  | SLC2A7 | 610 371 | SLC2A7 belongs to a family of transporters that catalyze the uptake of sugars through facilitated diffusion. This family of transporters shows conservation of 12 transmembrane helices as well as functionally significant amino acid residues |                                |
|  |  |  | SLC2A5 | 138 230 | Solute carrier family 2 (facilitated glucose/fructose transporter), member 5                                                                                                                                                                    |                                |
|  |  |  | MIR34A | 611 172 | microRNA 34a                                                                                                                                                                                                                                    |                                |
|  |  |  | H6PD   | 138 090 | hexose-6-phosphate dehydrogenase (glucose 1-dehydrogenase)                                                                                                                                                                                      | Cortisone reductase deficiency |
|  |  |  | SPSB1  | 611 657 | splA/ryanodine receptor domain and SOCS box containing 1                                                                                                                                                                                        |                                |
|  |  |  |        |         |                                                                                                                                                                                                                                                 |                                |

| 2 | 19p13.12p13.2 | deletion |          |         |                                                                                                                                                                                                                                                                                                                                                                                                                                                                                                                                                                      |  |
|---|---------------|----------|----------|---------|----------------------------------------------------------------------------------------------------------------------------------------------------------------------------------------------------------------------------------------------------------------------------------------------------------------------------------------------------------------------------------------------------------------------------------------------------------------------------------------------------------------------------------------------------------------------|--|
|   |               |          | AXL      | 109 135 | <p>The protein encoded by this gene is a member of the receptor tyrosine kinase subfamily.</p> <p>Although it is similar to other receptor tyrosine kinases, this protein represents a unique structure of the extracellular region that juxtaposes IgL and FNIII repeats. It transduces signals from the extracellular matrix into the cytoplasm by binding growth factors like vitamin K-dependent protein growth-arrest-specific gene 6. It is involved in the stimulation of cell proliferation and can also mediate cell aggregation by homophilic binding.</p> |  |
|   |               |          | HNRNPUL1 | 605 800 | <p>This gene encodes a nuclear RNA-binding protein of the heterogeneous nuclear ribonucleoprotein (hnRNP) family.</p> <p>This protein binds specifically to</p>                                                                                                                                                                                                                                                                                                                                                                                                      |  |

|  |  |  |        |         |                                                                                                                                                                                                                                                                                                                                                            |                                                                           |
|--|--|--|--------|---------|------------------------------------------------------------------------------------------------------------------------------------------------------------------------------------------------------------------------------------------------------------------------------------------------------------------------------------------------------------|---------------------------------------------------------------------------|
|  |  |  |        |         | adenovirus E1B-55kDa oncoprotein.<br>It may play an important role in nucleocytoplasmic RNA transport, and its function is modulated by E1B-55kDa in adenovirus-infected cells.                                                                                                                                                                            |                                                                           |
|  |  |  | TGFB1  | 190 180 | This gene encodes a member of the transforming growth factor beta (TGFB) family of cytokines, which are multifunctional peptides that regulate proliferation, differentiation, adhesion, migration, and other functions in many cell types. Many cells have TGFB receptors, and the protein positively and negatively regulates many other growth factors. | Camurati-Engelmann disease<br>{Cystic fibrosis lung disease, modifier of} |
|  |  |  | B9D2   | 611 951 | The gene is upregulated during mucociliary differentiation, and the encoded protein localizes to basal bodies and cilia.                                                                                                                                                                                                                                   | Meckel syndrome 10                                                        |
|  |  |  | EXOSC5 | 606 492 | exosome component 5                                                                                                                                                                                                                                                                                                                                        |                                                                           |
|  |  |  | BCKDHA | 608 348 | The branched-chain alpha-keto acid                                                                                                                                                                                                                                                                                                                         | Maple syrup urine disease,                                                |

|  |  |  |         |         |                                                                                                                                                                                                        |                           |
|--|--|--|---------|---------|--------------------------------------------------------------------------------------------------------------------------------------------------------------------------------------------------------|---------------------------|
|  |  |  |         |         | (BCAA) dehydrogenase (BCKD) complex is an inner mitochondrial enzyme complex that catalyzes the second major step in the catabolism of the branched-chain amino acids leucine, isoleucine, and valine. | type Ia                   |
|  |  |  | CEACAM5 | 114 890 | Carcinoembryonic antigen-related cell adhesion molecule 5                                                                                                                                              |                           |
|  |  |  | CEACAM6 | 163 980 | Carcinoembryonic antigen is one of the most widely used tumor markers in serum immunoassay determinations of carcinoma.                                                                                |                           |
|  |  |  | CEACAM3 | 609 142 | This gene encodes a member of the family of carcinoembryonic antigen-related cell adhesion molecules (CEACAMs), which are used by several bacterial pathogens to bind and invade host cells.           |                           |
|  |  |  | RPS19   | 603 474 | This gene encodes a ribosomal protein that is a component of the 40S subunit                                                                                                                           | Diamond-Blackfan anemia 1 |

|  |  |  |         |         |                                                                                                                                                                                                                                                                                                                                                               |                      |
|--|--|--|---------|---------|---------------------------------------------------------------------------------------------------------------------------------------------------------------------------------------------------------------------------------------------------------------------------------------------------------------------------------------------------------------|----------------------|
|  |  |  | CD79A   | 112 205 | This gene encodes the Ig-alpha protein of the B-cell antigen component.                                                                                                                                                                                                                                                                                       | Agammaglobulinemia 3 |
|  |  |  | ARHGEF1 | 601 855 | Rho guanine nucleotide exchange factor (GEF) 1                                                                                                                                                                                                                                                                                                                |                      |
|  |  |  | RABAC1  | 604 925 | Rab acceptor 1 (prenylated)                                                                                                                                                                                                                                                                                                                                   |                      |
|  |  |  | ATP1A3  | 182 350 | The protein encoded by this gene belongs to the family of P-type cation transport ATPases, and to the subfamily of Na <sup>+</sup> /K <sup>+</sup> - ATPases. Na <sup>+</sup> /K <sup>+</sup> -ATPase is an integral membrane protein responsible for establishing and maintaining the electrochemical gradients of Na and K ions across the plasma membrane. | Dystonia-12          |
|  |  |  | GRIK5   | 600 283 | The protein encoded by this gene forms functional heteromeric kainate-preferring ionic channels with the subunits encoded by related gene family members. [                                                                                                                                                                                                   |                      |

|  |  |  |        |         |                                                                                                                                                                                                                                                                                                                                                                 |  |
|--|--|--|--------|---------|-----------------------------------------------------------------------------------------------------------------------------------------------------------------------------------------------------------------------------------------------------------------------------------------------------------------------------------------------------------------|--|
|  |  |  | POU2F2 | 164 176 | The encoded protein binds the octamer sequence 5'-ATTTGCAT-3', a common transcription factor binding site in immunoglobulin gene promoters.                                                                                                                                                                                                                     |  |
|  |  |  | GSK3A  | 606 784 | This gene encodes a multifunctional Ser/Thr protein kinase that is implicated in the control of several regulatory proteins including glycogen synthase, and transcription factors, such as JUN. It also plays a role in the WNT and PI3K signaling pathways, as well as regulates the production of beta-amyloid peptides associated with Alzheimer's disease. |  |
|  |  |  | ERF    | 611 888 | Members of the ETS family of transcription factors, such as ERF, regulate cell proliferation and differentiation.                                                                                                                                                                                                                                               |  |
|  |  |  | CIC    | 612 082 | capicua homolog (Drosophila)                                                                                                                                                                                                                                                                                                                                    |  |

|  |  |  |          |         |                                                                                                                                                                                                                                                                                         |  |
|--|--|--|----------|---------|-----------------------------------------------------------------------------------------------------------------------------------------------------------------------------------------------------------------------------------------------------------------------------------------|--|
|  |  |  | PAFAH1B3 | 603 074 | This gene encodes an acetylhydrolase that catalyzes the removal of an acetyl group from the glycerol backbone of platelet-activating factor.                                                                                                                                            |  |
|  |  |  | MEGF8    | 604 267 | multiple EGF-like-domains 8                                                                                                                                                                                                                                                             |  |
|  |  |  | CNFN     | 611 764 | cornifelin                                                                                                                                                                                                                                                                              |  |
|  |  |  | LIPE     | 151 750 | The long form is expressed in steroidogenic tissues such as testis, where it converts cholesteryl esters to free cholesterol for steroid hormone production. The short form is expressed in adipose tissue, among others, where it hydrolyzes stored triglycerides to free fatty acids. |  |
|  |  |  | CXCL17   | 611 387 | chemokine (C-X-C motif) ligand 17                                                                                                                                                                                                                                                       |  |
|  |  |  | CEACAM1  | 109 770 | The encoded protein mediates cell adhesion via homophilic as well as heterophilic binding to other proteins of the subgroup.                                                                                                                                                            |  |
|  |  |  | PSG3     | 176 392 | The human pregnancy-specific                                                                                                                                                                                                                                                            |  |

|  |  |  |        |         |                                                                                                                                                                            |  |
|--|--|--|--------|---------|----------------------------------------------------------------------------------------------------------------------------------------------------------------------------|--|
|  |  |  |        |         | glycoproteins (PSGs) are a family of proteins that are synthesized in large amounts by placental trophoblasts and released into the maternal circulation during pregnancy. |  |
|  |  |  | PSG8   | 176 397 | The human pregnancy-specific glycoproteins (PSGs) are a group of molecules that are mainly produced by the placental syncytiotrophoblasts during pregnancy.                |  |
|  |  |  | PSG10P | 176 399 | The human pregnancy-specific glycoproteins (PSGs) are a group of molecules that are mainly produced by the placental syncytiotrophoblasts during pregnancy.                |  |
|  |  |  | PSG1   | 176 390 | The human placenta is a multihormonal endocrine organ that produces hormones, enzymes, and other molecules that support fetal survival and development. Pregnancy-specific |  |



|  |  |  |       |         |                                                                                                                                                                                         |  |
|--|--|--|-------|---------|-----------------------------------------------------------------------------------------------------------------------------------------------------------------------------------------|--|
|  |  |  |       |         | beta-1-glycoprotein (PSBG, PSG) is a major product of the syncytiotrophoblast, reaching concentrations of 100 to 290 mg/l at term in the serum of pregnant women                        |  |
|  |  |  | PSG6  | 176 395 | The human pregnancy-specific glycoproteins (PSGs) are a group of molecules that are mainly produced by the placental syncytiotrophoblasts during pregnancy.                             |  |
|  |  |  | PSG7  | 176 396 | The PSG genes are expressed by placental trophoblasts and released into the maternal circulation during pregnancy, and are thought to be essential for maintenance of normal pregnancy. |  |
|  |  |  | PSG11 | 176 401 | The human pregnancy-specific glycoproteins (PSGs) are a group of molecules that are mainly produced by the placental syncytiotrophoblasts during pregnancy.                             |  |

|          |                       |                 |         |         |                                                                                                                                                                                                         |  |
|----------|-----------------------|-----------------|---------|---------|---------------------------------------------------------------------------------------------------------------------------------------------------------------------------------------------------------|--|
|          |                       |                 | PSG5    | 176 394 | he human pregnancy-specific glycoproteins (PSGs) are a group of molecules that are mainly produced by the placental syncytiotrophoblasts during pregnancy.                                              |  |
|          |                       |                 | PSG4    | 176 393 | The human pregnancy-specific glycoproteins (PSGs) are a family of proteins that are synthesized in large amounts by placental trophoblasts and released into the maternal circulation during pregnancy. |  |
|          |                       |                 | PSG9    | 176 398 | The human pregnancy-specific glycoproteins (PSGs) are a group of molecules that are mainly produced by the placental syncytiotrophoblasts during pregnancy.                                             |  |
|          |                       |                 | PRG1    | 605 157 | p53-responsive gene 1                                                                                                                                                                                   |  |
| <b>3</b> | <b>20q12.21q11.22</b> | <b>deletion</b> |         |         |                                                                                                                                                                                                         |  |
|          |                       |                 | DEFB118 | 607 650 | This gene encodes a member of the beta subfamily of defensins. Beta-defensins are antimicrobial peptides                                                                                                |  |

|  |  |  |      |         |                                                                                                                                                                                                                                                                                                                                                                                                                                    |  |
|--|--|--|------|---------|------------------------------------------------------------------------------------------------------------------------------------------------------------------------------------------------------------------------------------------------------------------------------------------------------------------------------------------------------------------------------------------------------------------------------------|--|
|  |  |  |      |         | that protect tissues and organs from infection by a variety of microorganisms.                                                                                                                                                                                                                                                                                                                                                     |  |
|  |  |  | REM1 | 610 388 | The encoded protein is expressed in endothelial cells, where it promotes reorganization of the actin cytoskeleton and morphological changes in the cells.                                                                                                                                                                                                                                                                          |  |
|  |  |  | HM13 | 607 106 | The protein encoded by this gene, which localizes to the endoplasmic reticulum, catalyzes intramembrane proteolysis of some signal peptides after they have been cleaved from a preprotein. This activity is required to generate signal sequence-derived human lymphocyte antigen-E epitopes that are recognized by the immune system, and to process hepatitis C virus core protein. The encoded protein is an integral membrane |  |

|  |  |  |        |         |                                                                                                                                                                                                                                                               |                                                                                         |
|--|--|--|--------|---------|---------------------------------------------------------------------------------------------------------------------------------------------------------------------------------------------------------------------------------------------------------------|-----------------------------------------------------------------------------------------|
|  |  |  |        |         | protein with sequence motifs characteristic of the presenilin-type aspartic proteases.                                                                                                                                                                        |                                                                                         |
|  |  |  | ID1    | 600 349 | The encoded protein has no DNA binding activity and therefore can inhibit the DNA binding and transcriptional activation ability of basic HLH proteins with which it interacts. This protein may play a role in cell growth, senescence, and differentiation. |                                                                                         |
|  |  |  | COX4I2 | 607 976 | Cytochrome c oxidase (COX), the terminal enzyme of the mitochondrial respiratory chain, catalyzes the electron transfer from reduced cytochrome c to oxygen.                                                                                                  | Exocrine pancreatic insufficiency, dyserythropoietic anemia, and calvarial hyperostosis |
|  |  |  | BCL2L1 | 600 039 | The proteins encoded by this gene are located at the outer mitochondrial membrane, and have been shown to regulate outer mitochondrial membrane channel (VDAC) opening.                                                                                       |                                                                                         |

|  |  |  |       |         |                                                                                                                                                                                                                                                                                      |                                                       |
|--|--|--|-------|---------|--------------------------------------------------------------------------------------------------------------------------------------------------------------------------------------------------------------------------------------------------------------------------------------|-------------------------------------------------------|
|  |  |  | TPX2  | 605 917 | TPX2, microtubule-associated, homolog ( <i>Xenopus laevis</i> )                                                                                                                                                                                                                      |                                                       |
|  |  |  | MYLK2 | 606 566 | This gene encodes a myosin light chain kinase, a calcium/calmodulin dependent enzyme, that is exclusively expressed in adult skeletal muscle. [                                                                                                                                      | Cardiomyopathy, hypertrophic, midventricular, digenic |
|  |  |  | FOXS1 | 602 939 | The protein encoded by this intronless gene contains a forkhead domain and is found predominantly in aorta and kidney. The function of the encoded protein is unknown.                                                                                                               |                                                       |
|  |  |  | PDRG1 | 610 789 | p53 and DNA-damage regulated 1                                                                                                                                                                                                                                                       |                                                       |
|  |  |  | HCK   | 142 370 | This protein is primarily hemopoietic, particularly in cells of the myeloid and B-lymphoid lineages. It may help couple the Fc receptor to the activation of the respiratory burst. In addition, it may play a role in neutrophil migration and in the degranulation of neutrophils. |                                                       |

|  |  |  |        |         |                                                                                                                                                                                                                                                                                                                                            |  |
|--|--|--|--------|---------|--------------------------------------------------------------------------------------------------------------------------------------------------------------------------------------------------------------------------------------------------------------------------------------------------------------------------------------------|--|
|  |  |  | PLAGL2 | 604 866 | pleiomorphic adenoma gene-like 2                                                                                                                                                                                                                                                                                                           |  |
|  |  |  | POFUT1 | 607 491 | This gene encodes a member of the glycosyltransferase O-Fuc family. This enzyme adds O-fucose through an O-glycosidic linkage to conserved serine or threonine residues in the epidermal growth factor-like repeats of a number of cell surface and secreted proteins. O-fucose glycans are involved in ligand-induced receptor signaling. |  |
|  |  |  | KIF3B  | 603 754 | The protein encoded by this gene acts as a heterodimer with kinesin family member 3A to aid in chromosome movement during mitosis and meiosis. The encoded protein is a plus end-directed microtubule motor and can interact with the SMC3 subunit of the cohesin complex. In addition, the encoded protein may be involved in the         |  |

|  |  |  |        |         |                                                                                                                                                                                                                                                                                                                                                                                                                                                                              |                                                                      |
|--|--|--|--------|---------|------------------------------------------------------------------------------------------------------------------------------------------------------------------------------------------------------------------------------------------------------------------------------------------------------------------------------------------------------------------------------------------------------------------------------------------------------------------------------|----------------------------------------------------------------------|
|  |  |  |        |         | intracellular movement of membranous organelles                                                                                                                                                                                                                                                                                                                                                                                                                              |                                                                      |
|  |  |  | ASXL1  | 612 990 | The protein is a member of the Polycomb group of proteins, which are necessary for the maintenance of stable repression of homeotic and other loci. The protein is thought to disrupt chromatin in localized areas, enhancing transcription of certain genes while repressing the transcription of other genes. The protein encoded by this gene functions as a ligand-dependent co-activator for retinoic acid receptor in cooperation with nuclear receptor coactivator 1. | Bohring-Opitz syndrome<br>Myelodysplastic syndrome, somatic          |
|  |  |  | DNMT3B | 602 900 | CpG methylation is an epigenetic modification that is important for embryonic development, imprinting, and X-chromosome inactivation.                                                                                                                                                                                                                                                                                                                                        | Immunodeficiency-centromeric instability-facial anomalies syndrome 1 |
|  |  |  | MAPRE1 | 603 108 | The protein also associates with                                                                                                                                                                                                                                                                                                                                                                                                                                             |                                                                      |

|  |  |  |         |         |                                                                                                                                                                                                                                       |  |
|--|--|--|---------|---------|---------------------------------------------------------------------------------------------------------------------------------------------------------------------------------------------------------------------------------------|--|
|  |  |  |         |         | components of the dynactin complex and the intermediate chain of cytoplasmic dynein. Because of these associations, it is thought that this protein is involved in the regulation of microtubule structures and chromosome stability. |  |
|  |  |  | SUN5    | 613 942 | Sad1 and UNC84 domain containing 5                                                                                                                                                                                                    |  |
|  |  |  | BPIFB2  | 614 108 | This gene encodes a member of the lipid transfer/lipoplysaccharide binding protein (LT/LBP) gene family. It is highly expressed in hypertrophic tonsils.                                                                              |  |
|  |  |  | BPIFB6  | 614 110 | BPI fold containing family B, member 6                                                                                                                                                                                                |  |
|  |  |  | BPIFA4P | 607 627 | BPI fold containing family A, member 4, pseudogene                                                                                                                                                                                    |  |
|  |  |  | BPIFA1  | 607 412 | The exact biological function of this gene is not known, however, it has been suggested to be involved in                                                                                                                             |  |



|          |                |                    |          |         |                                                                                                                                                                                                                                                                                          |                     |
|----------|----------------|--------------------|----------|---------|------------------------------------------------------------------------------------------------------------------------------------------------------------------------------------------------------------------------------------------------------------------------------------------|---------------------|
|          |                |                    |          |         | inflammatory responses to irritants in the upper airways. It may also serve as a potential molecular marker for detection of micrometastasis in non-small-cell lung cancer.                                                                                                              |                     |
|          |                |                    | CDK5RAP1 | 608 200 | Neuronal CDC2-like kinase, which is involved in the regulation of neuronal differentiation, is composed of a catalytic subunit, CDK5, and an activating subunit, p25NCK5A. The protein encoded by this gene binds to p25NCK5A and therefore may be involved in neuronal differentiation. |                     |
|          |                |                    | SNTA1    | 601 017 | The protein encoded by this gene is a peripheral membrane protein found associated with dystrophin and dystrophin-related proteins.                                                                                                                                                      | Long QT syndrome 12 |
| <b>4</b> | <b>9q21.33</b> | <b>duplication</b> |          |         |                                                                                                                                                                                                                                                                                          |                     |
|          |                |                    | DAPK1    | 600 831 | Death-associated protein kinase 1 is a positive mediator of gamma-interferon induced programmed cell                                                                                                                                                                                     |                     |

|  |            |          |       |         |                                                                                                                                                                                                                                                                                                                                                                                                                 |                                                     |
|--|------------|----------|-------|---------|-----------------------------------------------------------------------------------------------------------------------------------------------------------------------------------------------------------------------------------------------------------------------------------------------------------------------------------------------------------------------------------------------------------------|-----------------------------------------------------|
|  |            |          |       |         | <p>death.</p> <p>DAPK1 encodes a structurally unique 160-kD calmodulin dependent serine-threonine kinase that carries 8 ankyrin repeats and 2 putative P-loop consensus sites. It is a tumor suppressor candidate.</p>                                                                                                                                                                                          |                                                     |
|  | 11q24.1q25 | deletion |       |         |                                                                                                                                                                                                                                                                                                                                                                                                                 |                                                     |
|  |            |          | SORL1 | 602 005 | <p>This gene encodes a mosaic protein that belongs to at least two families: the vacuolar protein sorting 10 (VPS10) domain-containing receptor family, and the low density lipoprotein receptor (LDLR) family.</p> <p>The encoded protein also contains fibronectin type III repeats and an epidermal growth factor repeat. The encoded protein is translated as a preproprotein and likely plays roles in</p> | {Alzheimer disease, pathogenesis, association with} |

|  |  |  |           |         |                                                                                                                                                                                                                      |  |
|--|--|--|-----------|---------|----------------------------------------------------------------------------------------------------------------------------------------------------------------------------------------------------------------------|--|
|  |  |  |           |         | endocytosis and sorting. There may be an association between expression of this locus and Alzheimer's Disease                                                                                                        |  |
|  |  |  | MIR125B1  | 610 104 | microRNAs (miRNAs) are short (20-24 nt) non-coding RNAs that are involved in post-transcriptional regulation of gene expression in multicellular organisms by affecting both the stability and translation of mRNAs. |  |
|  |  |  | BLID      | 608 853 | This gene encodes a BH3-like motif containing protein involved in cell death. The encoded protein may induce apoptosis in a caspase-dependent manner.                                                                |  |
|  |  |  | MIRLET7A2 | 612 142 | microRNAs (miRNAs) are short (20-24 nt) non-coding RNAs that are involved in post-transcriptional regulation of gene expression in multicellular organisms by affecting                                              |  |

|  |  |  |         |         |                                                                                                                                                                                                                                                                                                                                                     |  |
|--|--|--|---------|---------|-----------------------------------------------------------------------------------------------------------------------------------------------------------------------------------------------------------------------------------------------------------------------------------------------------------------------------------------------------|--|
|  |  |  |         |         | both the stability and translation of mRNAs.                                                                                                                                                                                                                                                                                                        |  |
|  |  |  | MIR100  | 613 186 | microRNAs (miRNAs) are short (20-24 nt) non-coding RNAs that are involved in post-transcriptional regulation of gene expression in multicellular organisms by affecting both the stability and translation of mRNAs.                                                                                                                                |  |
|  |  |  | UBASH3B | 609 201 | This gene encodes a protein that contains a ubiquitin associated domain at the N-terminus, an SH3 domain, and a C-terminal domain with similarities to the catalytic motif of phosphoglycerate mutase. The encoded protein was found to inhibit endocytosis of epidermal growth factor receptor (EGFR) and platelet-derived growth factor receptor. |  |
|  |  |  | CRTAM   | 612 597 | The CRTAM gene is upregulated in                                                                                                                                                                                                                                                                                                                    |  |

|  |  |  |       |         |                                                                                                                                                                                                                                                          |  |
|--|--|--|-------|---------|----------------------------------------------------------------------------------------------------------------------------------------------------------------------------------------------------------------------------------------------------------|--|
|  |  |  |       |         | CD4 (see MIM 186940)-positive and CD8 (see CD8A; MIM 186910)-positive T cells and encodes a type I transmembrane protein with V and C1-like Ig domains                                                                                                   |  |
|  |  |  | BSX   | 611 074 | brain-specific homeobox                                                                                                                                                                                                                                  |  |
|  |  |  | HSPA8 | 600 816 | This gene encodes a member of the heat shock protein 70 family, which contains both heat-inducible and constitutively expressed members. This protein belongs to the latter group, which are also referred to as heat-shock cognate proteins.            |  |
|  |  |  | ASAM  | 611 693 | The CTX (see VSIG2, MIM 606011) family of proteins, including ASAM, are type I transmembrane proteins within the Ig superfamily that localize to junctional complexes between endothelial and epithelial cells and may play a role in cell-cell adhesion |  |
|  |  |  | SCN3B | 608 214 | This gene encodes one member of                                                                                                                                                                                                                          |  |

|  |  |  |        |         |                                                                                                                                                    |                                            |
|--|--|--|--------|---------|----------------------------------------------------------------------------------------------------------------------------------------------------|--------------------------------------------|
|  |  |  |        |         | the sodium channel beta subunit gene family, and influences the inactivation kinetics of the sodium channel.                                       |                                            |
|  |  |  | ZNF202 | 603 430 | zinc finger protein 202                                                                                                                            | Brugada syndrome 7                         |
|  |  |  | VWA5A  | 602 929 | von Willebrand factor A domain containing 5A                                                                                                       |                                            |
|  |  |  | PANX3  | 608 422 | The protein encoded by this gene belongs to the innexin family. Innexin family members are known to be the structural components of gap junctions. |                                            |
|  |  |  | TBRG1  | 610 614 | transforming growth factor beta regulator 1                                                                                                        |                                            |
|  |  |  | SIAE   | 610 079 | This gene encodes an enzyme which removes 9-O-acetylation modifications from sialic acids.                                                         | {Autoimmune disease, susceptibility to, 6} |
|  |  |  | SPA17  | 608 621 | This gene encodes a protein present at the cell surface.                                                                                           |                                            |
|  |  |  | NRGN   | 602 350 | Neurogranin (NRGN) is the human homolog of the neuron-specific rat                                                                                 |                                            |

|  |  |  |       |         |                                                                                                                                                                                                                                     |                                                    |
|--|--|--|-------|---------|-------------------------------------------------------------------------------------------------------------------------------------------------------------------------------------------------------------------------------------|----------------------------------------------------|
|  |  |  |       |         | RC3/neurogranin gene. This gene encodes a postsynaptic protein kinase substrate that binds calmodulin in the absence of calcium.                                                                                                    |                                                    |
|  |  |  | VSIG2 | 606 011 | V-set and immunoglobulin domain containing 2                                                                                                                                                                                        |                                                    |
|  |  |  | ROBO3 | 608 630 | The ROBO3 gene regulates axonal navigation at the ventral midline of the neural tube. In mouse, loss of Robo3 results in a complete failure of commissural axons to cross the midline throughout the spinal cord and the hindbrain. | Gaze palsy, horizontal, with progressive scoliosis |
|  |  |  | ROBO4 | 607 528 | roundabout, axon guidance receptor, homolog 4 (Drosophila)                                                                                                                                                                          |                                                    |
|  |  |  | HEPN1 | 611 641 | Transient transfection studies showed that expression of this gene significantly inhibited cell growth, and it may have a role in apoptosis. Expression of this gene is downregulated or lost in                                    |                                                    |

|  |  |  |         |         |                                                                                                                                                                                                                                               |                                                                                                                                                                               |
|--|--|--|---------|---------|-----------------------------------------------------------------------------------------------------------------------------------------------------------------------------------------------------------------------------------------------|-------------------------------------------------------------------------------------------------------------------------------------------------------------------------------|
|  |  |  |         |         | hepatocellular carcinomas (HCC), suggesting that loss of this gene is involved in carcinogenesis of hepatocytes (PMID:12971969).                                                                                                              |                                                                                                                                                                               |
|  |  |  | HEPACAM | 611 642 | The protein encoded by this gene is a single-pass type I membrane protein that localizes to the cytoplasmic side of the cell membrane. The encoded protein acts as a homodimer and is involved in cell motility and cell-matrix interactions. | Megalencephalic leukoencephalopathy with subcortical cysts 2A<br>Megalencephalic leukoencephalopathy with subcortical cysts 2B, remitting, with or without mental retardation |
|  |  |  | PKNOX2  | 613 066 | Homeodomain proteins are sequence-specific transcription factors that share a highly conserved DNA-binding domain and play fundamental roles in cell proliferation, differentiation, and death.                                               |                                                                                                                                                                               |
|  |  |  | FEZ1    | 604 825 | This gene is an ortholog of the C. elegans unc-76 gene, which is necessary for normal axonal bundling                                                                                                                                         |                                                                                                                                                                               |



|  |  |  |       |         |                                                                                                                                                                                                                                                                                                                                                  |  |
|--|--|--|-------|---------|--------------------------------------------------------------------------------------------------------------------------------------------------------------------------------------------------------------------------------------------------------------------------------------------------------------------------------------------------|--|
|  |  |  |       |         | and elongation within axon bundles.                                                                                                                                                                                                                                                                                                              |  |
|  |  |  | EI24  | 605 170 | This gene has higher expression in p53-expressing cells than in control cells and is an immediate-early induction target of p53-mediated apoptosis. The protein encoded by this gene contains six putative transmembrane domains and may suppress cell growth by inducing apoptotic cell death through the caspase 9 and mitochondrial pathways. |  |
|  |  |  | STT3A | 601 134 | STT3, subunit of the oligosaccharyltransferase complex, homolog A ( <i>S. cerevisiae</i> )                                                                                                                                                                                                                                                       |  |
|  |  |  | CHEK1 | 603 078 | This protein acts to integrate signals from ATM and ATR, two cell cycle proteins involved in DNA damage responses, that also associate with chromatin in meiotic prophase I. Phosphorylation                                                                                                                                                     |  |

|  |  |  |       |         |                                                                                                                                                                                                                                        |                        |
|--|--|--|-------|---------|----------------------------------------------------------------------------------------------------------------------------------------------------------------------------------------------------------------------------------------|------------------------|
|  |  |  |       |         | of CDC25A protein phosphatase by this protein is required for cells to delay cell cycle progression in response to double-strand DNA breaks.                                                                                           |                        |
|  |  |  | ACRV1 | 102 525 | This gene encodes a testis-specific, differentiation antigen, acrosomal vesicle protein 1, that arises within the acrosomal vesicle during spermatogenesis, and is associated with the acrosomal membranes and matrix of mature sperm. |                        |
|  |  |  | PATE1 | 606 861 | prostate and testis expressed 1                                                                                                                                                                                                        |                        |
|  |  |  | HYLS1 | 610 693 | This gene encodes a protein localized to the cytoplasm.                                                                                                                                                                                | Hydrolethalus syndrome |
|  |  |  | DDX25 | 607 663 | The encoded protein is a gonadotropin-regulated and developmentally expressed testicular RNA helicase. It may serve to maintain testicular functions related to steroidogenesis and                                                    |                        |

|  |  |  |         |         |                                                                                                                                                                                                                                                                                                    |                                                                                                |
|--|--|--|---------|---------|----------------------------------------------------------------------------------------------------------------------------------------------------------------------------------------------------------------------------------------------------------------------------------------------------|------------------------------------------------------------------------------------------------|
|  |  |  |         |         | spermatogenesis.                                                                                                                                                                                                                                                                                   |                                                                                                |
|  |  |  | CDON    | 608 707 | This gene encodes a cell surface receptor that is a member of the immunoglobulin superfamily.                                                                                                                                                                                                      | Holoprosencephaly 11                                                                           |
|  |  |  | SRPR    | 182 180 | The gene encodes a subunit of the endoplasmic reticulum signal recognition particle receptor that, in conjunction with the signal recognition particle, is involved in the targeting and translocation of signal sequence tagged secretory and membrane proteins across the endoplasmic reticulum. |                                                                                                |
|  |  |  | FOXRED1 | 613 622 | This gene encodes a protein that contains a FAD-dependent oxidoreductase domain.<br>The encoded protein is localized to the mitochondria and may function as a chaperone protein required for the function of mitochondrial complex I.                                                             | Leigh syndrome due to mitochondrial complex I deficiency<br>Mitochondrial complex I deficiency |

|  |  |  |         |         |                                                                                                                                                                                                                                                                  |                                                                                                                                                                 |
|--|--|--|---------|---------|------------------------------------------------------------------------------------------------------------------------------------------------------------------------------------------------------------------------------------------------------------------|-----------------------------------------------------------------------------------------------------------------------------------------------------------------|
|  |  |  | TIRAP   | 606 252 | The protein encoded by this gene is a TIR adaptor protein involved in the TLR4 signaling pathway of the immune system. It activates NF-kappa-B, MAPK1, MAPK3 and JNK, which then results in cytokine secretion and the inflammatory response.                    | {Bacteremia, protection against}<br>{Malaria, protection against}<br>{Pneumococcal disease, invasive, protection against}<br>{Tuberculosis, protection against} |
|  |  |  | DCPS    | 610 534 | decapping enzyme, scavenger                                                                                                                                                                                                                                      |                                                                                                                                                                 |
|  |  |  | ST3GAL4 | 104 240 | This gene encodes a member of the glycosyltransferase 29 family, a group of enzymes involved in protein glycosylation.                                                                                                                                           |                                                                                                                                                                 |
|  |  |  | KIRREL3 | 607 761 | The protein encoded by this gene is a member of the nephrin-like protein family.<br><br>These proteins are expressed in fetal and adult brain, and also in podocytes of kidney glomeruli. The cytoplasmic domains of these proteins interact with the C-terminus | Mental retardation, autosomal dominant 4                                                                                                                        |

|  |  |  |       |         |                                                                                                                                                                                                                                                                                                                                         |                          |
|--|--|--|-------|---------|-----------------------------------------------------------------------------------------------------------------------------------------------------------------------------------------------------------------------------------------------------------------------------------------------------------------------------------------|--------------------------|
|  |  |  |       |         | of podocin, also expressed in the podocytes, cells involved in ensuring size- and charge-selective ultrafiltration.                                                                                                                                                                                                                     |                          |
|  |  |  | ETS1  | 164 720 | These proteins function either as transcriptional activators or repressors of numerous genes, and are involved in stem cell development, cell senescence and death, and tumorigenesis.                                                                                                                                                  |                          |
|  |  |  | FLI1  | 193 067 | Friend leukemia virus integration 1                                                                                                                                                                                                                                                                                                     |                          |
|  |  |  | KCNJ1 | 600 359 | <p>The protein encoded by this gene is an integral membrane protein and inward-rectifier type potassium channel.</p> <p>It is activated by internal ATP and probably plays an important role in potassium homeostasis. The encoded protein has a greater tendency to allow potassium to flow into a cell rather than out of a cell.</p> | Bartter syndrome, type 2 |

|  |  |  |           |         |                                                                                                                                                                                                                                                                |                                                               |
|--|--|--|-----------|---------|----------------------------------------------------------------------------------------------------------------------------------------------------------------------------------------------------------------------------------------------------------------|---------------------------------------------------------------|
|  |  |  | KCNJ5     | 600 734 | The protein encoded by this gene is an integral membrane protein and inward-rectifier type potassium channel. The encoded protein, which has a greater tendency to allow potassium to flow into a cell rather than out of a cell, is controlled by G-proteins. | Hyperaldosteronism, familial, type III<br>Long QT syndrome 13 |
|  |  |  | TP53AIP1  | 605 426 | This gene is specifically expressed in the thymus, and encodes a protein that is localized to the mitochondrion. The expression of this gene is inducible by p53, and it is thought to play an important role in mediating p53-dependent apoptosis.            |                                                               |
|  |  |  | ARHGAP32  | 608 541 | RICS is a neuron-associated GTPase-activating protein that may regulate dendritic spine morphology and strength by modulating Rho GTPase                                                                                                                       |                                                               |
|  |  |  | LOC100188 | 194 630 | zinc finger protein 123, pseudogene                                                                                                                                                                                                                            |                                                               |

|  |  |  |       |         |                                                                                                                                                                                                                                                                                                                                     |  |
|--|--|--|-------|---------|-------------------------------------------------------------------------------------------------------------------------------------------------------------------------------------------------------------------------------------------------------------------------------------------------------------------------------------|--|
|  |  |  | 891   |         |                                                                                                                                                                                                                                                                                                                                     |  |
|  |  |  | BARX2 | 604 823 | This gene encodes a member of the homeobox transcription factor family. A highly related protein in mouse has been shown to influence cellular processes that control cell adhesion and remodeling of the actin cytoskeleton in myoblast fusion and chondrogenesis. The encoded protein may also play a role in cancer progression. |  |
|  |  |  | NFRKB | 164 013 | nuclear factor related to kappaB binding protein                                                                                                                                                                                                                                                                                    |  |
|  |  |  | APLP2 | 104 776 | This protein interacts with major histocompatibility complex (MHC) class I molecules. The synergy of this protein and the APP is required to mediate neuromuscular transmission, spatial learning and synaptic plasticity. This protein has been implicated in the pathogenesis of                                                  |  |

|  |  |  |          |         |                                                                                                                                                                                                                                                                                     |                               |
|--|--|--|----------|---------|-------------------------------------------------------------------------------------------------------------------------------------------------------------------------------------------------------------------------------------------------------------------------------------|-------------------------------|
|  |  |  |          |         | Alzheimer's disease.                                                                                                                                                                                                                                                                |                               |
|  |  |  | ST14     | 606 797 | The protein encoded by this gene is an epithelial-derived, integral membrane serine protease. This protease forms a complex with the Kunitz-type serine protease inhibitor, HAI-1, and is found to be activated by sphingosine 1-phosphate.                                         | Ichthyosis with hypotrichosis |
|  |  |  | ADAMTS8  | 605 175 | The enzyme encoded by this gene contains two C-terminal TS motifs, and disrupts angiogenesis in vivo.                                                                                                                                                                               |                               |
|  |  |  | ADAMTS15 | 607 509 | This gene encodes a member of the ADAMTS (a disintegrin and metalloproteinase with thrombospondin motifs) protein family. ADAMTS family members share several distinct protein modules, including a propeptide region, a metalloproteinase domain, a disintegrin-like domain, and a |                               |



|  |  |  |         |         |                                                                                                                                                                                                                                                               |                                                                                 |
|--|--|--|---------|---------|---------------------------------------------------------------------------------------------------------------------------------------------------------------------------------------------------------------------------------------------------------------|---------------------------------------------------------------------------------|
|  |  |  |         |         | thrombospondin type 1 (TS) motif.                                                                                                                                                                                                                             |                                                                                 |
|  |  |  | NTM     | 607 938 | The encoded protein may promote neurite outgrowth and adhesion via a homophilic mechanism.                                                                                                                                                                    |                                                                                 |
|  |  |  | OPCML   | 600 632 | This gene encodes a member of the IgLON subfamily in the immunoglobulin protein superfamily. The encoded protein is localized in the plasma membrane and may have an accessory role in opioid receptor function. This gene has an ortholog in rat and bovine. | {Ovarian cancer, somatic}                                                       |
|  |  |  | SPATA19 | 609 805 | spermatogenesis associated 19                                                                                                                                                                                                                                 |                                                                                 |
|  |  |  | IGSF9B  | 613 773 | immunoglobulin superfamily, member 9B                                                                                                                                                                                                                         |                                                                                 |
|  |  |  | JAM3    | 606 871 | The protein encoded by this immunoglobulin superfamily gene member is localized in the tight junctions between high endothelial cells.                                                                                                                        | Hemorrhagic destruction of the brain, subependymal calcification, and cataracts |
|  |  |  | NCAPD3  | 609 276 | Condensin complexes I and II play                                                                                                                                                                                                                             |                                                                                 |

|  |  |  |        |         |                                                                                                                                                                                                                                                                                                                          |                                         |
|--|--|--|--------|---------|--------------------------------------------------------------------------------------------------------------------------------------------------------------------------------------------------------------------------------------------------------------------------------------------------------------------------|-----------------------------------------|
|  |  |  |        |         | essential roles in mitotic chromosome assembly and segregation.                                                                                                                                                                                                                                                          |                                         |
|  |  |  | VPS26B | 610 027 | vacuolar protein sorting 26 homolog B ( <i>S. pombe</i> )                                                                                                                                                                                                                                                                |                                         |
|  |  |  | THYN1  | 613 739 | This gene encodes a protein that is highly conserved among vertebrates and plant species and may be involved in the induction of apoptosis.                                                                                                                                                                              |                                         |
|  |  |  | ACAD8  | 604 773 | This gene encodes a member of the acyl-CoA dehydrogenase family of enzymes that catalyze the dehydrogenation of acyl-CoA derivatives in the metabolism of fatty acids or branch chained amino acids. The encoded protein is a mitochondrial enzyme that functions in catabolism of the branched-chain amino acid valine. | Isobutyryl-CoA dehydrogenase deficiency |
|  |  |  | B3GAT1 | 151 290 | The protein encoded by this gene is a member of the glucuronyltransferase gene family. These enzymes exhibit                                                                                                                                                                                                             |                                         |

|          |                    |                 |        |         |                                                                                                                                                                                                                                                                                                    |                                                                                         |
|----------|--------------------|-----------------|--------|---------|----------------------------------------------------------------------------------------------------------------------------------------------------------------------------------------------------------------------------------------------------------------------------------------------------|-----------------------------------------------------------------------------------------|
|          |                    |                 |        |         | strict acceptor specificity, recognizing nonreducing terminal sugars and their anomeric linkages. This gene product functions as the key enzyme in a glucuronyl transfer reaction during the biosynthesis of the carbohydrate epitope HNK-1 (human natural killer-1, also known as CD57 and LEU7). |                                                                                         |
|          | 18p11.31           | deletion        |        |         |                                                                                                                                                                                                                                                                                                    |                                                                                         |
|          |                    |                 | DLGAP1 | 605 445 | discs, large (Drosophila) homolog-associated protein 1                                                                                                                                                                                                                                             |                                                                                         |
| <b>6</b> | <b>4p16.3p16.1</b> | <b>deletion</b> |        |         |                                                                                                                                                                                                                                                                                                    |                                                                                         |
|          |                    |                 | ZNF141 | 194 648 | zinc finger protein 141                                                                                                                                                                                                                                                                            |                                                                                         |
|          |                    |                 | PDE6B  | 180 072 | Photon absorption triggers a signaling cascade in rod photoreceptors that activates cGMP phosphodiesterase (PDE), resulting in the rapid hydrolysis of cGMP, closure of cGMP-gated cation channels, and hyperpolarization of the cell. PDE is a peripheral membrane heterotrimeric                 | Night blindness, congenital stationary, autosomal dominant 2<br>Retinitis pigmentosa-40 |

|  |  |  |       |                                                                                                      |                                                                                                                                                                                                                                                                                                                                                                                                                                                                                                                                                                                                          |  |
|--|--|--|-------|------------------------------------------------------------------------------------------------------|----------------------------------------------------------------------------------------------------------------------------------------------------------------------------------------------------------------------------------------------------------------------------------------------------------------------------------------------------------------------------------------------------------------------------------------------------------------------------------------------------------------------------------------------------------------------------------------------------------|--|
|  |  |  |       | <p>enzyme made up of alpha, beta, and gamma subunits.</p> <p>This gene encodes the beta subunit.</p> |                                                                                                                                                                                                                                                                                                                                                                                                                                                                                                                                                                                                          |  |
|  |  |  | ATP5I | 601 519                                                                                              | <p>Mitochondrial ATP synthase catalyzes ATP synthesis, utilizing an electrochemical gradient of protons across the inner membrane during oxidative phosphorylation. It is composed of two linked multi-subunit complexes: the soluble catalytic core, F1, and the membrane-spanning component, Fo, which comprises the proton channel. The F1 complex consists of 5 different subunits (alpha, beta, gamma, delta, and epsilon) assembled in a ratio of 3 alpha, 3 beta, and a single representative of the other 3.</p> <p>The Fo seems to have nine subunits (a, b, c, d, e, f, g, F6 and 8). This</p> |  |

|  |  |  |       |                                               |                                                                                                                                                                                                                                                                                                                       |
|--|--|--|-------|-----------------------------------------------|-----------------------------------------------------------------------------------------------------------------------------------------------------------------------------------------------------------------------------------------------------------------------------------------------------------------------|
|  |  |  |       | gene encodes the e subunit of the Fo complex. |                                                                                                                                                                                                                                                                                                                       |
|  |  |  | MYL5  | 160 782                                       | This gene encodes one of the myosin light chains, a component of the hexameric ATPase cellular motor protein myosin.                                                                                                                                                                                                  |
|  |  |  | CPLX1 | 605 032                                       | <p>Proteins encoded by the complexin/synaphin gene family are cytosolic proteins that function in synaptic vesicle exocytosis. These proteins bind syntaxin, part of the SNAP receptor.</p> <p>The protein product of this gene binds to the SNAP receptor complex and disrupts it, allowing transmitter release.</p> |
|  |  |  | GAK   | 602 052                                       | Cyclin G is a direct transcriptional target of the p53 tumor suppressor gene product and thus functions downstream of p53.                                                                                                                                                                                            |

|  |  |  |         |         |                                                                                                                                                                                                                                                                                                                                                                   |                                                        |
|--|--|--|---------|---------|-------------------------------------------------------------------------------------------------------------------------------------------------------------------------------------------------------------------------------------------------------------------------------------------------------------------------------------------------------------------|--------------------------------------------------------|
|  |  |  | DGKQ    | 601 207 | The protein encoded by this gene contains three cysteine-rich domains, a proline-rich region, and a pleckstrin homology domain with an overlapping Ras-associating domain. It is localized in the speckle domains of the nucleus, and mediates the regeneration of phosphatidylinositol (PI) from diacylglycerol in the PI-cycle during cell signal transduction. |                                                        |
|  |  |  | SLC26A1 | 610 130 | This gene is a member of a family of sulfate/anion transporter genes. Family members are well conserved in their genomic (number and size of exons) and protein (aa length among species) structures, but have markedly different tissue expression patterns.                                                                                                     |                                                        |
|  |  |  | IDUA    | 252 800 | This gene encodes an enzyme that hydrolyzes the terminal alpha-L-                                                                                                                                                                                                                                                                                                 | Mucopolysaccharidosis Ih<br>Mucopolysaccharidosis Ih/s |

|  |  |  |        |         |                                                                                                                                                                                              |                          |
|--|--|--|--------|---------|----------------------------------------------------------------------------------------------------------------------------------------------------------------------------------------------|--------------------------|
|  |  |  |        |         | iduronic acid residues of two glycosaminoglycans, dermatan sulfate and heparan sulfate.                                                                                                      | Mucopolysaccharidosis Is |
|  |  |  | FGFRL1 | 605 830 | The protein encoded by this gene is a member of the fibroblast growth factor receptor (FGFR) family, where amino acid sequence is highly conserved between members and throughout evolution. |                          |
|  |  |  | RNF212 | 612 041 | This gene encodes a RING finger protein that may function as a ubiquitin ligase. The encoded protein may be involved in meiotic recombination.                                               | Recombination rate QTL 1 |
|  |  |  | SPON2  | 605 918 | spondin 2, extracellular matrix protein                                                                                                                                                      |                          |
|  |  |  | CTBP1  | 602 618 | This gene encodes a protein that binds to the C-terminus of adenovirus E1A proteins. This phosphoprotein is a transcriptional repressor and may play a role during cellular proliferation.   |                          |

|  |  |  |        |         |                                                                                                                                                                                                |                                  |
|--|--|--|--------|---------|------------------------------------------------------------------------------------------------------------------------------------------------------------------------------------------------|----------------------------------|
|  |  |  | MAEA   | 606 801 | This gene product mediates the attachment of erythroblasts to macrophages. This attachment promotes terminal maturation and enucleation of erythroblasts, presumably by suppressing apoptosis. |                                  |
|  |  |  | CRIPAK | 610 203 | cysteine-rich PAK1 inhibitor                                                                                                                                                                   |                                  |
|  |  |  | SLBP   | 602 422 | This gene encodes a protein that binds to the stem-loop structure in replication-dependent histone mRNAs.                                                                                      |                                  |
|  |  |  | TACC3  | 605 303 | This gene encodes a member of the transforming acidic coiled-coil protein family. The encoded protein is a motor spindle protein that may play a role in stabilization of the mitotic spindle. | {?Bladder cancer susceptibility} |



|  |  |  |       |         |                                                                                                                                                                                                                                                                                            |                                                                                                                                                                                                                                                                                                                                                                                                                  |
|--|--|--|-------|---------|--------------------------------------------------------------------------------------------------------------------------------------------------------------------------------------------------------------------------------------------------------------------------------------------|------------------------------------------------------------------------------------------------------------------------------------------------------------------------------------------------------------------------------------------------------------------------------------------------------------------------------------------------------------------------------------------------------------------|
|  |  |  | FGFR3 | 134 934 | <p>This gene encodes a member of the fibroblast growth factor receptor (FGFR) family, with its amino acid sequence being highly conserved between members and among divergent species. FGFR family members differ from one another in their ligand affinities and tissue distribution.</p> | <p>Achondroplasia<br/> Bladder cancer, somatic<br/> CATSHL syndrome<br/> Cervical cancer, somatic<br/> Colorectal cancer, somatic<br/> Crouzon syndrome with acanthosis nigricans<br/> Hypochondroplasia<br/> LADD syndrome<br/> Muenke syndrome<br/> Nevus, keratinocytic, nonepidermolytic<br/> Spermatocytic seminoma, somatic<br/> Thanatophoric dysplasia, type I<br/> Thanatophoric dysplasia, type II</p> |
|  |  |  | LETM1 | 604 407 | <p>This gene encodes a protein that is localized to the inner mitochondrial membrane. The protein functions to</p>                                                                                                                                                                         |                                                                                                                                                                                                                                                                                                                                                                                                                  |

|  |  |  |       |         |                                                                                                                                                                                                                                                                                                                                                                  |  |
|--|--|--|-------|---------|------------------------------------------------------------------------------------------------------------------------------------------------------------------------------------------------------------------------------------------------------------------------------------------------------------------------------------------------------------------|--|
|  |  |  |       |         | maintain the mitochondrial tubular shapes and is required for normal mitochondrial morphology and cellular viability.                                                                                                                                                                                                                                            |  |
|  |  |  | WHSC1 | 602 952 | This gene encodes a protein that contains four domains present in other developmental proteins: a PWWP domain, an HMG box, a SET domain, and a PHD-type zinc finger. It is expressed ubiquitously in early development. Wolf-Hirschhorn syndrome (WHS) is a malformation syndrome associated with a hemizygous deletion of the distal short arm of chromosome 4. |  |
|  |  |  | WHSC2 | 606 026 | This gene is expressed ubiquitously with higher levels in fetal than in adult tissues.<br>It encodes a protein sharing 93% sequence identity with the mouse protein. Wolf-Hirschhorn syndrome                                                                                                                                                                    |  |

|  |  |  |       |         |                                                                                                                                                                                                                                                                                                                                                                          |                              |
|--|--|--|-------|---------|--------------------------------------------------------------------------------------------------------------------------------------------------------------------------------------------------------------------------------------------------------------------------------------------------------------------------------------------------------------------------|------------------------------|
|  |  |  |       |         | (WHS) is a malformation syndrome associated with a hemizygous deletion of the distal short arm of chromosome 4. This gene is mapped to the 165 kb WHS critical region, and may play a role in the phenotype of the WHS or Pitt-Rogers-Danks syndrome.                                                                                                                    |                              |
|  |  |  | NAT8L | 610 647 | This gene encodes a single-pass membrane protein, which contains a conserved sequence of the GCN5 or NAT superfamily of N-acetyltransferases and is a member of the N-acyltransferase (NAT) superfamily. This protein is a neuron-specific protein and is the N-acetylaspartate (NAA) biosynthetic enzyme, catalyzing the NAA synthesis from L-aspartate and acetyl-CoA. | N-acetylaspartate deficiency |
|  |  |  | POLN  | 610 887 | polymerase (DNA directed) nu                                                                                                                                                                                                                                                                                                                                             |                              |

|  |  |  |         |         |                                                                                                                                                                                                                                                   |           |
|--|--|--|---------|---------|---------------------------------------------------------------------------------------------------------------------------------------------------------------------------------------------------------------------------------------------------|-----------|
|  |  |  | HAUS3   | 613 430 | HAUS3 is 1 of 8 subunits of the 390-kD human augmin complex, or HAUS complex.                                                                                                                                                                     |           |
|  |  |  | ZFYVE28 | 614 176 | zinc finger, FYVE domain containing 28                                                                                                                                                                                                            |           |
|  |  |  | RNF4    | 602 850 | The protein encoded by this gene contains a RING finger motif and acts as a transcription regulator. This protein has been shown to interact with, and inhibit the activity of, TRPS1, a transcription suppressor of GATA-mediated transcription. |           |
|  |  |  | TNIP2   | 610 669 | TNIP2 binds to the C-terminal zinc finger domain of A20 (TNFAIP3; MIM 191163) and is involved in activation of the ERK (see MAPK3; MIM 601795) MAP kinase pathway in various cell types                                                           |           |
|  |  |  | SH3BP2  | 602 104 | The protein encoded by this gene has an N-terminal pleckstrin homology (PH) domain,                                                                                                                                                               | Cherubism |

|  |  |  |        |         |                                                                                                                                                                                                                                                                                                                                        |                                           |
|--|--|--|--------|---------|----------------------------------------------------------------------------------------------------------------------------------------------------------------------------------------------------------------------------------------------------------------------------------------------------------------------------------------|-------------------------------------------|
|  |  |  |        |         | <p>an SH3-binding proline-rich region, and a C-terminal SH2 domain. The protein binds to the SH3 domains of several proteins including the ABL1 and SYK protein tyrosine kinases , and functions as a cytoplasmic adaptor protein to positively regulate transcriptional activity in T, natural killer (NK), and basophilic cells.</p> |                                           |
|  |  |  | ADD1   | 102 680 | <p>Adducins are a family of cytoskeleton proteins encoded by three genes (alpha, beta, gamma). Adducin is a heterodimeric protein that consists of related subunits, which are produced from distinct genes but share a similar structure.</p>                                                                                         | {Hypertension, essential, salt-sensitive} |
|  |  |  | MFSD10 | 610 977 | <p>This gene encodes a member of the major facilitator superfamily of transporter proteins. The encoded protein likely functions in efflux of organic anions, including the non-</p>                                                                                                                                                   |                                           |

|  |  |  |       |         |                                                                                                                                                                                                                                                                                                                                       |                    |
|--|--|--|-------|---------|---------------------------------------------------------------------------------------------------------------------------------------------------------------------------------------------------------------------------------------------------------------------------------------------------------------------------------------|--------------------|
|  |  |  |       |         | steroidal anti-inflammatory drugs<br>indomethacin and diclofenac.                                                                                                                                                                                                                                                                     |                    |
|  |  |  | NOP14 | 611 526 | NOP14 plays a role in the processing<br>of the pre-18S rRNA and small<br>ribosomal subunit assembly                                                                                                                                                                                                                                   |                    |
|  |  |  | GRK4  | 137 026 | This gene encodes a member of the<br>guanine nucleotide-binding protein (G<br>protein)-coupled receptor kinase<br>subfamily of the Ser/Thr protein<br>kinase family.                                                                                                                                                                  |                    |
|  |  |  | HTT   | 613 004 | Huntingtin is a disease gene linked to<br>Huntington's disease, a<br>neurodegenerative disorder<br>characterized by loss of striatal<br>neurons. This is thought to be caused<br>by an expanded, unstable<br>trinucleotide repeat in the huntingtin<br>gene, which translates as a<br>polyglutamine repeat in the protein<br>product. | Huntington disease |
|  |  |  | RGS12 | 602 512 | This gene encodes a member of the                                                                                                                                                                                                                                                                                                     |                    |

|  |  |  |        |         |                                                                                                                                                                                                                                         |                                                                          |
|--|--|--|--------|---------|-----------------------------------------------------------------------------------------------------------------------------------------------------------------------------------------------------------------------------------------|--------------------------------------------------------------------------|
|  |  |  |        |         | 'regulator of G protein signaling' (RGS) gene family. The encoded protein may function as a guanosine triphosphatase (GTPase)-activating protein as well as a transcriptional repressor. This protein may play a role in tumorigenesis. |                                                                          |
|  |  |  | HGFAC  | 604 552 | {the encoded protein]It acts as serine protease that converts hepatocyte growth factor to the active form.                                                                                                                              |                                                                          |
|  |  |  | DOK7   | 610 285 | The protein encoded by this gene is essential for neuromuscular synaptogenesis.                                                                                                                                                         | Fetal akinesia deformation sequence<br>Myasthenia, limb-girdle, familial |
|  |  |  | LRPAP1 | 104 225 | low density lipoprotein receptor-related protein associated protein 1                                                                                                                                                                   |                                                                          |
|  |  |  | ADRA2C | 104 250 | Alpha-2-adrenergic receptors are members of the G protein-coupled receptor superfamily. They include 3 highly homologous subtypes: alpha2A, alpha2B, and                                                                                | {Congestive heart failure and beta-blocker response, modifier of}        |

|  |  |  |         |         |                                                                                                                                                                                                                                                          |                                                                                                     |
|--|--|--|---------|---------|----------------------------------------------------------------------------------------------------------------------------------------------------------------------------------------------------------------------------------------------------------|-----------------------------------------------------------------------------------------------------|
|  |  |  |         |         | alpha2C. These receptors have a critical role in regulating neurotransmitter release from sympathetic nerves and from adrenergic neurons in the central nervous system.                                                                                  |                                                                                                     |
|  |  |  | OTOP1   | 607 806 | otopetrin 1                                                                                                                                                                                                                                              |                                                                                                     |
|  |  |  | D4S234E | 607 645 | DNA segment on chromosome 4 (unique) 234 expressed sequence                                                                                                                                                                                              |                                                                                                     |
|  |  |  | MSX1    | 142 983 | This gene encodes a member of the muscle segment homeobox gene family. The encoded protein functions as a transcriptional repressor during embryogenesis through interactions with components of the core transcription complex and other homeoproteins. | Orofacial cleft<br>Tooth agenesis, selective, 1, with or without orofacial cleft<br>Witkop syndrome |
|  |  |  | CYTL1   | 607 930 | cytokine-like 1                                                                                                                                                                                                                                          |                                                                                                     |
|  |  |  | EVC2    | 607 261 | This gene encodes a protein that functions in bone formation and skeletal development.                                                                                                                                                                   | Ellis-van Creveld syndrome                                                                          |



|  |  |  |         |         |                                                                                                                                                                                                                                                                                                |                                                                                               |
|--|--|--|---------|---------|------------------------------------------------------------------------------------------------------------------------------------------------------------------------------------------------------------------------------------------------------------------------------------------------|-----------------------------------------------------------------------------------------------|
|  |  |  | EVC     | 604 831 | This gene encodes a protein containing a leucine zipper and a transmembrane domain.                                                                                                                                                                                                            | 4p16.2 Ellis-van Creveld syndrome<br>Weyers acrodistal dysostosis                             |
|  |  |  | CRMP1   | 602 462 | This gene encodes a member of a family of cytosolic phosphoproteins expressed exclusively in the nervous system.<br>The encoded protein is thought to be a part of the semaphorin signal transduction pathway implicated in semaphorin-induced growth cone collapse during neural development. |                                                                                               |
|  |  |  | JAKMIP1 | 611 195 | janus kinase and microtubule interacting protein 1                                                                                                                                                                                                                                             |                                                                                               |
|  |  |  | WFS1    | 606 201 | This gene encodes a transmembrane protein, which is located primarily in the endoplasmic reticulum and ubiquitously expressed with highest levels in brain, pancreas, heart, and                                                                                                               | Deafness, autosomal dominant<br>Wolfram syndrome<br>Wolfram-like syndrome, autosomal dominant |

|  |  |  |         |         |                                                                                                                                                                                                                                                                                                                                        |                                                                   |
|--|--|--|---------|---------|----------------------------------------------------------------------------------------------------------------------------------------------------------------------------------------------------------------------------------------------------------------------------------------------------------------------------------------|-------------------------------------------------------------------|
|  |  |  |         |         | insulinoma beta-cell lines.                                                                                                                                                                                                                                                                                                            | {Diabetes mellitus,<br>noninsulin-dependent,<br>association with} |
|  |  |  | PPP2R2C | 605 997 | This gene encodes a gamma isoform of the regulatory subunit B55 subfamily.                                                                                                                                                                                                                                                             |                                                                   |
|  |  |  | S100P   | 600 614 | The protein encoded by this gene is a member of the S100 family of proteins containing 2 EF-hand calcium-binding motifs.<br>S100 proteins are localized in the cytoplasm and/or nucleus of a wide range of cells, and involved in the regulation of a number of cellular processes such as cell cycle progression and differentiation. |                                                                   |
|  |  |  | CNO     | 605 695 | This intronless gene encodes a protein that may play a role in organelle biogenesis associated with melanosomes, platelet dense granules, and lysosomes.                                                                                                                                                                               |                                                                   |

|  |  |  |        |         |                                                                                                                                                                                                                                                                                         |  |
|--|--|--|--------|---------|-----------------------------------------------------------------------------------------------------------------------------------------------------------------------------------------------------------------------------------------------------------------------------------------|--|
|  |  |  | TADA2B | 608 790 | TADA2B functions as a transcriptional adaptor protein that potentiates transcription through coordination of histone acetyltransferase (HAT) activity and by linking activation factors to basal transcriptional machinery                                                              |  |
|  |  |  | GRPEL1 | 606 173 | GrpE-like 1, mitochondrial (E. coli)                                                                                                                                                                                                                                                    |  |
|  |  |  | SORCS2 | 606 284 | This gene encodes one family member of vacuolar protein sorting 10 (VPS10) domain-containing receptor proteins.                                                                                                                                                                         |  |
|  |  |  | AFAP1  | 608 252 | The protein encoded by this gene is a Src binding partner. It may represent a potential modulator of actin filament integrity in response to cellular signals, and may function as an adaptor protein by linking Src family members and/or other signaling proteins to actin filaments. |  |
|  |  |  | MIR95  | 613 185 | microRNA 95                                                                                                                                                                                                                                                                             |  |

|  |  |  |        |         |                                                                                                                                                                                                                                                                                        |  |
|--|--|--|--------|---------|----------------------------------------------------------------------------------------------------------------------------------------------------------------------------------------------------------------------------------------------------------------------------------------|--|
|  |  |  | ABLIM2 | 612 544 | actin binding LIM protein family, member 2                                                                                                                                                                                                                                             |  |
|  |  |  | HTRA3  | 608 785 | HtrA serine peptidase 3                                                                                                                                                                                                                                                                |  |
|  |  |  | ACOX3  | 603 402 | Acyl-Coenzyme A oxidase 3 also know as pristanoyl -CoA oxidase (ACOX3)is involved in the desaturation of 2-methyl branched fatty acids in peroxisomes.                                                                                                                                 |  |
|  |  |  | GPR78  | 606 921 | The protein encoded by this gene belongs to the G protein-coupled receptor family, which contain 7 transmembrane domains and transduce extracellular signals through heterotrimeric G proteins. This is an orphan receptor, which displays significant level of constitutive activity. |  |
|  |  |  | CPZ    | 603 105 | This gene encodes a member of the metallocooxypeptidase family. This enzyme displays carboxypeptidase activity towards substrates with basic                                                                                                                                           |  |

|  |             |             |        |         |                                                                                                                                                                                                                                                                                                                           |                        |
|--|-------------|-------------|--------|---------|---------------------------------------------------------------------------------------------------------------------------------------------------------------------------------------------------------------------------------------------------------------------------------------------------------------------------|------------------------|
|  |             |             |        |         | C-terminal residues.<br>It is most active at neutral pH and is inhibited by active site-directed inhibitors of metallocarboxypeptidases.                                                                                                                                                                                  |                        |
|  | 8p23.3p23.1 | duplication |        |         |                                                                                                                                                                                                                                                                                                                           |                        |
|  |             |             | FBXO25 | 609 098 | This gene encodes a member of the F-box protein family which is characterized by an approximately 40 amino acid motif, the F-box. The F-box proteins constitute one of the four subunits of ubiquitin protein ligase complex called SCFs (SKP1-cullin-F-box), which function in phosphorylation-dependent ubiquitination. |                        |
|  |             |             | DLGAP2 | 605 438 | The product of this gene is one of the membrane-associated guanylate kinases localized at postsynaptic density in neuronal cells.                                                                                                                                                                                         |                        |
|  |             |             | CLN8   | 607 837 | This gene encodes a transmembrane                                                                                                                                                                                                                                                                                         | Ceroid lipofuscinosis, |

|  |  |  |          |                                                                                                                                               |                                                                                                                                                                                                                                                         |                                              |
|--|--|--|----------|-----------------------------------------------------------------------------------------------------------------------------------------------|---------------------------------------------------------------------------------------------------------------------------------------------------------------------------------------------------------------------------------------------------------|----------------------------------------------|
|  |  |  |          | protein belonging to a family of proteins containing TLC domains, which are postulated to function in lipid synthesis, transport, or sensing. | neuronal, 8<br>Ceroid lipofuscinosis, neuronal, 8, Northern epilepsy variant                                                                                                                                                                            |                                              |
|  |  |  | ARHGEF10 | 608 136                                                                                                                                       | Rho GTPases play a fundamental role in numerous cellular processes that are initiated by extracellular stimuli that work through G protein coupled receptors. The encoded protein may form complex with G proteins and stimulate Rho-dependent signals. | Slowed nerve conduction velocity, AD         |
|  |  |  | MYOM2    | 603 509                                                                                                                                       | The giant protein titin, together with its associated proteins, interconnects the major structure of sarcomeres, the M bands and Z discs.                                                                                                               |                                              |
|  |  |  | CSMD1    | 608 397                                                                                                                                       | CUB and Sushi multiple domains 1                                                                                                                                                                                                                        |                                              |
|  |  |  | MCPH1    | 607 117                                                                                                                                       | This gene encodes a DNA damage response protein.                                                                                                                                                                                                        | Microcephaly, primary autosomal recessive, 1 |
|  |  |  | ANGPT2   | 601 922                                                                                                                                       | The protein encoded by this gene is an antagonist of angiotensin II                                                                                                                                                                                     |                                              |

|  |          |          |          |         |                                                                                                                                                                              |                                                                                                                   |
|--|----------|----------|----------|---------|------------------------------------------------------------------------------------------------------------------------------------------------------------------------------|-------------------------------------------------------------------------------------------------------------------|
|  |          |          |          |         | (ANGPT1) and endothelial TEK tyrosine kinase (TIE-2, TEK). The encoded protein disrupts the vascular remodeling ability of ANGPT1 and may induce endothelial cell apoptosis. |                                                                                                                   |
|  | 14q32.33 | deletion |          |         |                                                                                                                                                                              |                                                                                                                   |
|  |          |          | IGHA1    | 146 900 | immunoglobulin heavy constant alpha 1                                                                                                                                        |                                                                                                                   |
|  |          |          | IGHG1    | 147 100 | immunoglobulin heavy constant gamma 1 (G1m marker)                                                                                                                           |                                                                                                                   |
|  | 17p12    | deletion |          |         |                                                                                                                                                                              |                                                                                                                   |
|  |          |          | COX10    | 602 125 | Cytochrome c oxidase (COX), the terminal component of the mitochondrial respiratory chain, catalyzes the electron transfer from reduced cytochrome c to oxygen.              | Encephalopathy, progressive mitochondrial, with proximal renal tubulopathy due to cytochrome c oxidase deficiency |
|  |          |          | HS3ST3B1 | 604 058 | Heparan sulfate biosynthetic enzymes are key components in generating a myriad of distinct                                                                                   |                                                                                                                   |

|          |                    |                    |       |         |                                                                                                                                                                                                                                                                                                               |                              |
|----------|--------------------|--------------------|-------|---------|---------------------------------------------------------------------------------------------------------------------------------------------------------------------------------------------------------------------------------------------------------------------------------------------------------------|------------------------------|
|          |                    |                    |       |         | heparan sulfate fine structures that carry out multiple biologic activities. The enzyme encoded by this gene is a member of the heparan sulfate biosynthetic enzyme family.                                                                                                                                   |                              |
| <b>7</b> | <b>5p13.3</b>      | <b>duplication</b> |       |         |                                                                                                                                                                                                                                                                                                               |                              |
|          |                    |                    | NPR3  | 108 962 | This gene encodes one of three natriuretic peptide receptors.                                                                                                                                                                                                                                                 | Hypertension, salt-resistant |
| <b>8</b> | <b>3p26.3p22.3</b> | <b>duplication</b> |       |         |                                                                                                                                                                                                                                                                                                               |                              |
|          |                    |                    | CHL1  | 607 416 | The protein encoded by this gene is a member of the L1 gene family of neural cell adhesion molecules. It is a neural recognition molecule that may be involved in signal transduction pathways.<br>The deletion of one copy of this gene may be responsible for mental defects in patients with 3p- syndrome. |                              |
|          |                    |                    | CNTN6 | 607 220 | The protein encoded by this gene is a member of the immunoglobulin superfamily. It is a                                                                                                                                                                                                                       |                              |



|  |  |  |       |                                                                                                                                                                                                                           |                                                                                                                                                                                                                                                                                                                                                   |
|--|--|--|-------|---------------------------------------------------------------------------------------------------------------------------------------------------------------------------------------------------------------------------|---------------------------------------------------------------------------------------------------------------------------------------------------------------------------------------------------------------------------------------------------------------------------------------------------------------------------------------------------|
|  |  |  |       | <p>glycosylphosphatidylinositol (GPI)-anchored neuronal membrane protein that functions as a cell adhesion molecule.</p> <p>It may play a role in the formation of axon connections in the developing nervous system.</p> |                                                                                                                                                                                                                                                                                                                                                   |
|  |  |  | CNTN4 | 607 280                                                                                                                                                                                                                   | This gene encodes a member of the contactin family of immunoglobulins.                                                                                                                                                                                                                                                                            |
|  |  |  | IL5RA | 147 851                                                                                                                                                                                                                   | <p>The protein encoded by this gene is an interleukin 5 specific subunit of a heterodimeric cytokine receptor.</p> <p>The receptor is comprised of a ligand specific alpha subunit and a signal transducing beta subunit shared by the receptors for interleukin 3 (IL3), colony stimulating factor 2 (CSF2/GM-CSF), and interleukin 5 (IL5).</p> |
|  |  |  | TRNT1 | 612 907                                                                                                                                                                                                                   | The CCA-adding enzyme TRNT1 (EC 2.7.7.25) is an essential enzyme that                                                                                                                                                                                                                                                                             |

|  |  |  |        |         |                                                                                                                                                                                                                                                                                                                                                         |                                           |
|--|--|--|--------|---------|---------------------------------------------------------------------------------------------------------------------------------------------------------------------------------------------------------------------------------------------------------------------------------------------------------------------------------------------------------|-------------------------------------------|
|  |  |  |        |         | catalyzes the addition of the CCA terminus to the 3-prime end of tRNA precursors.                                                                                                                                                                                                                                                                       |                                           |
|  |  |  | CRBN   | 609 262 | This gene encodes a protein related to the Lon protease protein family. In rodents and other mammals this gene product is found in the cytoplasm localized with a calcium channel membrane protein, and is thought to play a role in brain development. Mutations in this gene are associated with autosomal recessive nonsyndromic mental retardation. | Mental retardation, autosomal recessive 2 |
|  |  |  | SETMAR | 609 834 | SET domain and mariner transposase fusion gene                                                                                                                                                                                                                                                                                                          |                                           |
|  |  |  | SUMF1  | 607 939 | This gene encodes an enzyme that catalyzes the hydrolysis of sulfate esters by oxidizing a cysteine residue in the substrate sulfatase to an active site 3-oxoalanine residue, which is                                                                                                                                                                 | Multiple sulfatase deficiency             |

|  |  |  |         |         |                                                                                                                                                                                                                                  |                           |
|--|--|--|---------|---------|----------------------------------------------------------------------------------------------------------------------------------------------------------------------------------------------------------------------------------|---------------------------|
|  |  |  |         |         | also known as C-alpha-formylglycine.                                                                                                                                                                                             |                           |
|  |  |  | ITPR1   | 147 265 | This gene encodes an intracellular receptor for inositol 1,4,5-trisphosphate. Upon stimulation by inositol 1,4,5-trisphosphate, this receptor mediates calcium release from the endoplasmic reticulum.                           | Spinocerebellar ataxia 15 |
|  |  |  | EGOT    | 611 662 | eosinophil granule ontogeny transcript (non-protein coding)                                                                                                                                                                      |                           |
|  |  |  | BHLHE40 | 604 256 | This gene encodes a basic helix-loop-helix protein expressed in various tissues.                                                                                                                                                 |                           |
|  |  |  | EDEM1   | 607 673 | ER degradation enhancer, mannosidase alpha-like 1                                                                                                                                                                                |                           |
|  |  |  | GRM7    | 604 101 | L-glutamate is the major excitatory neurotransmitter in the central nervous system, and it activates both ionotropic and metabotropic glutamate receptors. Glutamatergic neurotransmission is involved in most aspects of normal |                           |

|  |  |  |           |         |                                                                                                                                                                                                                                                             |                                                                                                                                                                                                                                            |
|--|--|--|-----------|---------|-------------------------------------------------------------------------------------------------------------------------------------------------------------------------------------------------------------------------------------------------------------|--------------------------------------------------------------------------------------------------------------------------------------------------------------------------------------------------------------------------------------------|
|  |  |  |           |         | brain function and can be perturbed in many neuropathologic conditions.                                                                                                                                                                                     |                                                                                                                                                                                                                                            |
|  |  |  | LMCD1     | 604 859 | The protein encoded by this gene contains a cysteine-rich domain in the N-terminal region and 2 LIM domains in the C-terminal region. It also has several potential phosphorylation and N-myristoylation sites and a single potential N-glycosylation site. |                                                                                                                                                                                                                                            |
|  |  |  | LINC00312 | 610 485 | long intergenic non-protein coding RNA 312                                                                                                                                                                                                                  |                                                                                                                                                                                                                                            |
|  |  |  | CAV3      | 601 253 | This gene encodes a caveolin family member, which functions as a component of the caveolae plasma membranes found in most cell types.                                                                                                                       | <p>Cardiomyopathy, familial hypertrophic</p> <p>Creatine phosphokinase, elevated serum</p> <p>Long QT syndrome-9</p> <p>Muscular dystrophy, limb-girdle, type IC</p> <p>Myopathy, distal, Tateyama type</p> <p>Rippling muscle disease</p> |

|  |  |  |        |         |                                                                                                                                                                                                                                                                    |  |
|--|--|--|--------|---------|--------------------------------------------------------------------------------------------------------------------------------------------------------------------------------------------------------------------------------------------------------------------|--|
|  |  |  | OXTR   | 167 055 | The protein encoded by this gene belongs to the G-protein coupled receptor family and acts as a receptor for oxytocin. Its activity is mediated by G proteins which activate a phosphatidylinositol-calcium second messenger system.                               |  |
|  |  |  | RAD18  | 605 256 | The protein encoded by this gene is highly similar to <i>S. cerevisiae</i> DNA damage repair protein Rad18. Yeast Rad18 functions through its interaction with Rad6, which is an ubiquitin-conjugating enzyme required for post-replication repair of damaged DNA. |  |
|  |  |  | SRGAP3 | 606 525 | SLIT-ROBO Rho GTPase activating protein 3                                                                                                                                                                                                                          |  |
|  |  |  | LHFPL4 | 610 240 | This gene is a member of the lipoma HMGIC fusion partner (LHFP) gene family, which is a subset of the superfamily of tetraspan                                                                                                                                     |  |

|  |  |  |        |         |                                                                                                                                                                |                                                  |
|--|--|--|--------|---------|----------------------------------------------------------------------------------------------------------------------------------------------------------------|--------------------------------------------------|
|  |  |  |        |         | transmembrane protein encoding genes.                                                                                                                          |                                                  |
|  |  |  | MTMR14 | 611 089 | This gene encodes a myotubularin-related protein.                                                                                                              | {Centronuclear myopathy, autosomal, modifier of} |
|  |  |  | BRPF1  | 602 410 | The protein encoded by this gene is expressed ubiquitously and at the highest level in testes and spermatogonia.                                               |                                                  |
|  |  |  | OGG1   | 601 982 | This gene encodes the enzyme responsible for the excision of 8-oxoguanine, a mutagenic base byproduct which occurs as a result of exposure to reactive oxygen. | Renal cell carcinoma, clear cell, somatic        |
|  |  |  | CAMK1  | 604 998 | Calcium/calmodulin-dependent protein kinase I is expressed in many tissues and is a component of a calmodulin-dependent protein kinase cascade.                |                                                  |
|  |  |  | TADA3  | 602 945 | The protein encoded by this gene is a transcriptional activator adaptor and has been found to be part of the                                                   |                                                  |

|  |  |  |        |         |                                                                                                                                                                                                                                                                                                           |  |
|--|--|--|--------|---------|-----------------------------------------------------------------------------------------------------------------------------------------------------------------------------------------------------------------------------------------------------------------------------------------------------------|--|
|  |  |  |        |         | PCAF histone acetylase complex.                                                                                                                                                                                                                                                                           |  |
|  |  |  | ARPC4  | 604 226 | This gene encodes one of seven subunits of the human Arp2/3 protein complex. This complex controls actin polymerization in cells and has been conserved throughout eukaryotic evolution. This gene encodes the p20 subunit, which is necessary for actin nucleation and high-affinity binding to F-actin. |  |
|  |  |  | CIDEA  | 612 120 | This gene encodes a member of the cell death-inducing DNA fragmentation factor-like effector family. Members of this family play important roles in apoptosis.                                                                                                                                            |  |
|  |  |  | IL17RC | 610 925 | This gene encodes a single-pass type I membrane protein that shares similarity with the interleukin-17 receptor (IL-17RA). Unlike IL-17RA, which is predominantly expressed in hemopoietic cells, and binds with high                                                                                     |  |

|  |  |  |        |                                                                                                                                                                                                                                                                                          |                                                                                                                                                                                                                                                        |                                                                                                                                 |
|--|--|--|--------|------------------------------------------------------------------------------------------------------------------------------------------------------------------------------------------------------------------------------------------------------------------------------------------|--------------------------------------------------------------------------------------------------------------------------------------------------------------------------------------------------------------------------------------------------------|---------------------------------------------------------------------------------------------------------------------------------|
|  |  |  |        | <p>affinity to only IL-17A, this protein is expressed in nonhemopoietic tissues, and binds both IL-17A and IL-17F with similar affinities.</p> <p>The proinflammatory cytokines, IL-17A and IL-17F, have been implicated in the progression of inflammatory and autoimmune diseases.</p> |                                                                                                                                                                                                                                                        |                                                                                                                                 |
|  |  |  | CRELD1 | 607 170                                                                                                                                                                                                                                                                                  | <p>This gene encodes a member of a subfamily of epidermal growth factor-related proteins. The encoded protein is characterized by a cysteine-rich with epidermal growth factor-like domain. This protein may function as a cell adhesion molecule.</p> | <p>Atrioventricular septal defect, partial, with heterotaxy syndrome {Atrioventricular septal defect, susceptibility to, 2}</p> |
|  |  |  | FANCD2 | 613 984                                                                                                                                                                                                                                                                                  | <p>This gene encodes the protein for complementation group D2.</p>                                                                                                                                                                                     | <p>Fanconi anemia, complementation group D2</p>                                                                                 |
|  |  |  | BRK1   | 611 183                                                                                                                                                                                                                                                                                  | <p>BRICK1, SCAR/WAVE actin-nucleating complex subunit</p>                                                                                                                                                                                              |                                                                                                                                 |



|  |  |  |       |         |                                                                                                                                                                                                                                                                                                                                                                                                |                                                                                                                                                                    |
|--|--|--|-------|---------|------------------------------------------------------------------------------------------------------------------------------------------------------------------------------------------------------------------------------------------------------------------------------------------------------------------------------------------------------------------------------------------------|--------------------------------------------------------------------------------------------------------------------------------------------------------------------|
|  |  |  | VHL   | 608 537 | <p>The protein encoded by this gene is a component of the protein complex that includes elongin B, elongin C, and cullin-2, and possesses ubiquitin ligase E3 activity.</p> <p>This protein is involved in the ubiquitination and degradation of hypoxia-inducible-factor (HIF), which is a transcription factor that plays a central role in the regulation of gene expression by oxygen.</p> | <p>Erythrocytosis, familial, 2<br/>Hemangioblastoma, cerebellar, somatic<br/>Pheochromocytoma<br/>Renal cell carcinoma, somatic<br/>von Hippel-Lindau syndrome</p> |
|  |  |  | IRAK2 | 603 304 | interleukin-1 receptor-associated kinase 2                                                                                                                                                                                                                                                                                                                                                     |                                                                                                                                                                    |
|  |  |  | GHRL  | 605 353 | This gene encodes ghrelin-obestatin preproprotein, which generates ghrelin and obestatin.                                                                                                                                                                                                                                                                                                      | {Obesity, susceptibility to}                                                                                                                                       |
|  |  |  | SEC13 | 600 152 | The protein encoded by this gene belongs to the SEC13 family of WD-repeat proteins. It is a constituent of the endoplasmic reticulum and the nuclear pore complex.                                                                                                                                                                                                                             |                                                                                                                                                                    |

|  |  |  |         |         |                                                                                                                                                                                                                                                                                                                 |                                                 |
|--|--|--|---------|---------|-----------------------------------------------------------------------------------------------------------------------------------------------------------------------------------------------------------------------------------------------------------------------------------------------------------------|-------------------------------------------------|
|  |  |  | ATP2B2  | 108 733 | The protein encoded by this gene belongs to the family of P-type primary ion transport ATPases characterized by the formation of an aspartyl phosphate intermediate during the reaction cycle.                                                                                                                  | {Deafness, autosomal recessive 12, modifier of} |
|  |  |  | SLC6A11 | 607 952 | Gamma-aminobutyric acid (GABA) is a major inhibitory neurotransmitter.                                                                                                                                                                                                                                          |                                                 |
|  |  |  | SLC6A1  | 137 165 | The SLC6A1 gene encodes a gamma-aminobutyric acid (GABA) transporter, which removes GABA from the synaptic cleft                                                                                                                                                                                                |                                                 |
|  |  |  | HRH1    | 600 167 | The protein encoded by this gene is an integral membrane protein and belongs to the G protein-coupled receptor superfamily.<br>It mediates the contraction of smooth muscles, the increase in capillary permeability due to contraction of terminal venules, the release of catecholamine from adrenal medulla, |                                                 |

|  |  |  |       |                                                      |                                                                                                                                                                                                                 |                                                                                                                      |
|--|--|--|-------|------------------------------------------------------|-----------------------------------------------------------------------------------------------------------------------------------------------------------------------------------------------------------------|----------------------------------------------------------------------------------------------------------------------|
|  |  |  |       | and neurotransmission in the central nervous system. |                                                                                                                                                                                                                 |                                                                                                                      |
|  |  |  | ATG7  | 608 760                                              | ATG7 autophagy related 7 homolog (S. cerevisiae)                                                                                                                                                                |                                                                                                                      |
|  |  |  | SYN2  | 600 755                                              | This gene is a member of the synapsin gene family. Synapsins encode neuronal phosphoproteins which associate with the cytoplasmic surface of synaptic vesicles.                                                 | {Schizophrenia, susceptibility to}                                                                                   |
|  |  |  | TIMP4 | 601 915                                              | This gene belongs to the TIMP gene family. The proteins encoded by this gene family are inhibitors of the matrix metalloproteinases, a group of peptidases involved in degradation of the extracellular matrix. |                                                                                                                      |
|  |  |  | PPARG | 601 487                                              | This gene encodes a member of the peroxisome proliferator-activated receptor (PPAR) subfamily of nuclear receptors.                                                                                             | Carotid intimal medial thickness 1<br>Insulin resistance, severe, digenic<br>Lipodystrophy, familial partial, type 3 |

|  |  |  |        |         |                                                                                                                                                                                                                                 |                                                                                                        |
|--|--|--|--------|---------|---------------------------------------------------------------------------------------------------------------------------------------------------------------------------------------------------------------------------------|--------------------------------------------------------------------------------------------------------|
|  |  |  |        |         |                                                                                                                                                                                                                                 | Obesity, severe<br>[Obesity, resistance to]<br>{Diabetes, type 2}<br>{Glioblastoma, susceptibility to} |
|  |  |  | TSEN2  | 608 753 | This gene encodes one of the subunits of the tRNA splicing endonuclease.                                                                                                                                                        | Pontocerebellar hypoplasia type 2B                                                                     |
|  |  |  | MKRN2  | 608 426 | makorin ring finger protein 2                                                                                                                                                                                                   |                                                                                                        |
|  |  |  | RAF1   | 164 760 | This gene is the cellular homolog of viral raf gene (v-raf). The encoded protein is a MAP kinase kinase kinase (MAP3K), which functions downstream of the Ras family of membrane associated GTPases to which it binds directly. |                                                                                                        |
|  |  |  | CAND2  | 610 403 | cullin-associated and neddylation-dissociated 2 (putative)                                                                                                                                                                      |                                                                                                        |
|  |  |  | IQSEC1 | 610 166 | IQ motif and Sec7 domain 1                                                                                                                                                                                                      |                                                                                                        |
|  |  |  | NUP210 | 607 703 | he protein encoded by this gene is a membrane-spanning glycoprotein that                                                                                                                                                        |                                                                                                        |

|  |  |  |        |         |                                                                                                                                                                       |                                                                                 |
|--|--|--|--------|---------|-----------------------------------------------------------------------------------------------------------------------------------------------------------------------|---------------------------------------------------------------------------------|
|  |  |  |        |         | is a major component of the nuclear pore complex.                                                                                                                     |                                                                                 |
|  |  |  | HDAC11 | 607 226 | This gene encodes a class IV histone deacetylase. The encoded protein is localized to the nucleus and may be involved in regulating the expression of interleukin 10. |                                                                                 |
|  |  |  | FBLN2  | 135 821 | This gene encodes an extracellular matrix protein, which belongs to the fibulin family. This protein binds various extracellular ligands and calcium.                 |                                                                                 |
|  |  |  | WNT7A  | 601 570 | This gene is a member of the WNT gene family, which consists of structurally related genes that encode secreted signaling proteins.                                   | Fuhrmann syndrome<br>Ulna and fibula, absence of,<br>with sever limb deficiency |
|  |  |  | TPRXL  | 611 167 | Homeobox genes encode DNA-binding proteins, many of which are thought to be involved in early embryonic development.                                                  |                                                                                 |
|  |  |  | CHCHD4 | 611 077 | coiled-coil-helix-coiled-coil-helix                                                                                                                                   |                                                                                 |

|  |  |  |        |         |                                                                                                                                                                                                                           |                                              |
|--|--|--|--------|---------|---------------------------------------------------------------------------------------------------------------------------------------------------------------------------------------------------------------------------|----------------------------------------------|
|  |  |  |        |         | domain containing 4                                                                                                                                                                                                       |                                              |
|  |  |  | TMEM43 | 612 048 | This gene contains a response element for PPAR gamma (an adipogenic transcription factor), which may explain the fibrofatty replacement of the myocardium, a characteristic pathological finding in ARVC.                 | Arrhythmogenic right ventricular dysplasia 5 |
|  |  |  | XPC    | 613 208 | This gene encodes a component of the nucleotide excision repair (NER) pathway.                                                                                                                                            | Xeroderma pigmentosum, group C               |
|  |  |  | LSM3   | 607 283 | The Sm-like proteins are thought to form a stable heteromer present in tri-snRNP particles, which are important for pre-mRNA splicing.[                                                                                   |                                              |
|  |  |  | SLC6A6 | 186 854 | Taurine (2-aminoethanesulfonic acid) is a major intracellular amino acid in mammals. It is involved in a number of important physiologic processes, including bile acid conjugation in hepatocytes, modulation of calcium |                                              |

|  |  |  |         |                                                                                           |                                                                                                                                                                                                                                                                                                                                                                                                                              |
|--|--|--|---------|-------------------------------------------------------------------------------------------|------------------------------------------------------------------------------------------------------------------------------------------------------------------------------------------------------------------------------------------------------------------------------------------------------------------------------------------------------------------------------------------------------------------------------|
|  |  |  |         | flux and neural excitability, osmoregulation, detoxification, and membrane stabilization. |                                                                                                                                                                                                                                                                                                                                                                                                                              |
|  |  |  | NR2C2   | 601 426                                                                                   | <p>Members of the nuclear hormone receptor family, such as NR2C2, act as ligand-activated transcription factors.</p> <p>The proteins have an N-terminal transactivation domain, a central DNA-binding domain with 2 zinc fingers, and a ligand-binding domain at the C terminus.</p> <p>The activated receptor/ligand complex is translocated to the nucleus where it binds to hormone response elements of target genes</p> |
|  |  |  | MRPS25  | 611 987                                                                                   | This gene encodes a 28S subunit protein.                                                                                                                                                                                                                                                                                                                                                                                     |
|  |  |  | ZFYVE20 | 609 511                                                                                   | zinc finger, FYVE domain containing 20                                                                                                                                                                                                                                                                                                                                                                                       |
|  |  |  | DVWA    | 612 397                                                                                   | collagen, type VI, alpha 4                                                                                                                                                                                                                                                                                                                                                                                                   |

|  |  |  |         |              |                                                                                                                                                                                                                                                                 |                                          |
|--|--|--|---------|--------------|-----------------------------------------------------------------------------------------------------------------------------------------------------------------------------------------------------------------------------------------------------------------|------------------------------------------|
|  |  |  |         | pseudogene 1 |                                                                                                                                                                                                                                                                 |                                          |
|  |  |  | CAPN7   | 606 400      | The function of the protein encoded by this gene is not known.                                                                                                                                                                                                  |                                          |
|  |  |  | SH3BP5  | 605 612      | SH3-domain binding protein 5 (BTK-associated)                                                                                                                                                                                                                   |                                          |
|  |  |  | EAF1    | 608 315      | ELL associated factor 1                                                                                                                                                                                                                                         |                                          |
|  |  |  | COLQ    | 603 033      | This gene encodes the subunit of a collagen-like molecule associated with acetylcholinesterase in skeletal muscle.                                                                                                                                              | Endplate acetylcholinesterase deficiency |
|  |  |  | HACL1   | 604 300      | 2-hydroxyacyl-CoA lyase 1                                                                                                                                                                                                                                       |                                          |
|  |  |  | BTD     | 609 019      | Biotinidase functions to recycle biotin in the body by cleaving biocytin (biotin-epsilon-lysine), a normal product of carboxylase degradation, resulting in regeneration of free biotin. Biotinidase has also been shown to have biotinyl-transferase activity. | Biotinidase deficiency                   |
|  |  |  | ANKRD28 | 611 122      | ankyrin repeat domain 28                                                                                                                                                                                                                                        |                                          |
|  |  |  | DPH3    | 608 959      | This gene encodes a CSL zinc finger-                                                                                                                                                                                                                            |                                          |



|  |  |  |       |                                                                                                                                                                                                           |                                                                                                                                                                                                                                                                                                                      |                                            |
|--|--|--|-------|-----------------------------------------------------------------------------------------------------------------------------------------------------------------------------------------------------------|----------------------------------------------------------------------------------------------------------------------------------------------------------------------------------------------------------------------------------------------------------------------------------------------------------------------|--------------------------------------------|
|  |  |  |       | containing protein that is required for diphthamide biosynthesis. The encoded protein is necessary for the initial step in the modification of a histidine residue in elongation factor-2 to diphthamide. |                                                                                                                                                                                                                                                                                                                      |                                            |
|  |  |  | DAZL  | 601 486                                                                                                                                                                                                   | The protein encoded by this gene is localized to the nucleus and cytoplasm of fetal germ cells and to the cytoplasm of developing oocytes. In the testis, this protein is localized to the nucleus of spermatogonia but relocates to the cytoplasm during meiosis where it persists in spermatids and spermatozoa. T | {Spermatogenic failure, susceptibility to} |
|  |  |  | SATB1 | 602 075                                                                                                                                                                                                   | This gene encodes a matrix protein which binds nuclear matrix and scaffold-associating DNAs through a unique nuclear architecture.                                                                                                                                                                                   |                                            |
|  |  |  | KCNH8 | 608 260                                                                                                                                                                                                   | This gene encodes a member of the potassium channel, voltage-gated,                                                                                                                                                                                                                                                  |                                            |

|  |  |  |         |              |                                                                                                                                                                                                                                                                                                                                                              |
|--|--|--|---------|--------------|--------------------------------------------------------------------------------------------------------------------------------------------------------------------------------------------------------------------------------------------------------------------------------------------------------------------------------------------------------------|
|  |  |  |         | subfamily H. |                                                                                                                                                                                                                                                                                                                                                              |
|  |  |  | RAB5A   | 179 512      | RAB5A, member RAS oncogene family                                                                                                                                                                                                                                                                                                                            |
|  |  |  | KAT2B   | 602 303      | The protein encoded by this gene associates with p300/CBP. It has in vitro and in vivo binding activity with CBP and p300, and competes with E1A for binding sites in p300/CBP. It has histone acetyl transferase activity with core histones and nucleosome core particles, indicating that this protein plays a direct role in transcriptional regulation. |
|  |  |  | SGOL1   | 609 168      | shugoshin-like 1 (S. pombe)                                                                                                                                                                                                                                                                                                                                  |
|  |  |  | UBE2E2  | 602 163      | ubiquitin-conjugating enzyme E2E 2                                                                                                                                                                                                                                                                                                                           |
|  |  |  | UBE2E1  | 602 916      | This gene encodes a member of the E2 ubiquitin-conjugating enzyme family.                                                                                                                                                                                                                                                                                    |
|  |  |  | NKIRAS1 | 604 496      | NFKB inhibitor interacting Ras-like 1                                                                                                                                                                                                                                                                                                                        |
|  |  |  | RPL15   | 604 174      | This gene encodes a ribosomal                                                                                                                                                                                                                                                                                                                                |

|  |  |  |       |         |                                                                                                                                                                                                                                                                            |                                                                                                                                                 |
|--|--|--|-------|---------|----------------------------------------------------------------------------------------------------------------------------------------------------------------------------------------------------------------------------------------------------------------------------|-------------------------------------------------------------------------------------------------------------------------------------------------|
|  |  |  |       |         | protein that is a component of the 60S subunit.                                                                                                                                                                                                                            |                                                                                                                                                 |
|  |  |  | NR1D2 | 602 304 | <p>This gene encodes a member of the nuclear hormone receptor family, specifically the NR1 subfamily of receptors.</p> <p>The encoded protein functions as a transcriptional repressor and may play a role in circadian rhythms and carbohydrate and lipid metabolism.</p> |                                                                                                                                                 |
|  |  |  | THRB  | 190 160 | <p>The protein encoded by this gene is a nuclear hormone receptor for triiodothyronine. I</p>                                                                                                                                                                              | <p>Thyroid hormone resistance</p> <p>Thyroid hormone resistance, autosomal recessive</p> <p>Thyroid hormone resistance, selective pituitary</p> |
|  |  |  | RARB  | 180 220 | <p>This gene encodes retinoic acid receptor beta, a member of the thyroid-steroid hormone receptor superfamily of nuclear transcriptional regulators.</p>                                                                                                                  |                                                                                                                                                 |
|  |  |  | TOP2B | 126431  | <p>This gene encodes a DNA</p>                                                                                                                                                                                                                                             |                                                                                                                                                 |

|  |  |  |        |        |                                                                                                                                                                                                    |  |
|--|--|--|--------|--------|----------------------------------------------------------------------------------------------------------------------------------------------------------------------------------------------------|--|
|  |  |  |        |        | topoisomerase, an enzyme that controls and alters the topologic states of DNA during transcription.                                                                                                |  |
|  |  |  | NGLY1  | 610661 | This gene encodes an enzyme that catalyzes hydrolysis of an N(4)-(acetyl-beta-D-glucosaminy) asparagine residue to N-acetyl-beta-D-glucosaminyamine and a peptide containing an aspartate residue. |  |
|  |  |  | OXSM   | 610324 | This gene encodes a beta-ketoacyl synthetase.                                                                                                                                                      |  |
|  |  |  | SLC4A7 | 603353 | solute carrier family 4, sodium bicarbonate cotransporter, member 7                                                                                                                                |  |
|  |  |  | EOMES  | 604615 | This gene encodes a member of a conserved protein family that shares a common DNA-binding domain, the T-box.                                                                                       |  |
|  |  |  | AZI2   | 609916 | 5-azacytidine induced 2                                                                                                                                                                            |  |
|  |  |  | RBMS3  | 605786 | This gene encodes an RNA-binding protein that belongs to the c-myc gene single-strand binding protein                                                                                              |  |

|  |  |  |         |        |                                                                                                                      |                                                                                                                                                    |
|--|--|--|---------|--------|----------------------------------------------------------------------------------------------------------------------|----------------------------------------------------------------------------------------------------------------------------------------------------|
|  |  |  |         |        | family.                                                                                                              |                                                                                                                                                    |
|  |  |  | TGFBR2  | 190182 | This gene encodes a member of the Ser/Thr protein kinase family and the TGFB receptor subfamily.                     | Colorectal cancer, hereditary nonpolyposis, type 6<br>Esophageal cancer, somatic<br>Loeys-Dietz syndrome, type 1B<br>Loeys-Dietz syndrome, type 2B |
|  |  |  | STT3B   | 608605 | STT3, subunit of the oligosaccharyltransferase complex, homolog B ( <i>S. cerevisiae</i> )                           |                                                                                                                                                    |
|  |  |  | OSBPL10 | 606738 | This gene encodes a member of the oxysterol-binding protein (OSBP) family, a group of intracellular lipid receptors. |                                                                                                                                                    |
|  |  |  | GPD1L   | 611778 | The protein encoded by this gene catalyzes the conversion of sn-glycerol 3-phosphate to glycerone phosphate.         | Brugada syndrome 2                                                                                                                                 |
|  |  |  | CMTM8   | 607891 | This gene belongs to the chemokine-                                                                                  |                                                                                                                                                    |

|  |  |  |       |                                                                                                                                                                                                                           |                                                                                                                                                                   |                                                                                                    |
|--|--|--|-------|---------------------------------------------------------------------------------------------------------------------------------------------------------------------------------------------------------------------------|-------------------------------------------------------------------------------------------------------------------------------------------------------------------|----------------------------------------------------------------------------------------------------|
|  |  |  |       | <p>like factor gene superfamily, a novel family that is similar to the chemokine and the transmembrane 4 superfamilies. This gene is one of several chemokine-like factor genes located in a cluster on chromosome 3.</p> |                                                                                                                                                                   |                                                                                                    |
|  |  |  | CMTM7 | 607890                                                                                                                                                                                                                    | <p>The protein encoded by this gene is highly expressed in leukocytes, but its exact function is unknown.</p>                                                     |                                                                                                    |
|  |  |  | CMTM6 | 607889                                                                                                                                                                                                                    | <p>This gene is widely expressed in many tissues, but the exact function of the encoded protein is unknown.</p>                                                   |                                                                                                    |
|  |  |  | CCR4  | 604836                                                                                                                                                                                                                    | <p>The protein encoded by this gene belongs to the G-protein-coupled receptor family . It is a receptor for the CC chemokine - MIP-1, RANTES, TARC and MCP-1.</p> |                                                                                                    |
|  |  |  | GLB1  | 611458                                                                                                                                                                                                                    | <p>This gene encodes beta-galactosidase-1, a lysosomal enzyme that hydrolyzes the terminal beta-</p>                                                              | <p>GM1-gangliosidosis, type I<br/>GM1-gangliosidosis, type II<br/>GM1-gangliosidosis, type III</p> |

|  |  |  |         |                                                                  |                                                                                                                                                                                                                                                              |                                   |
|--|--|--|---------|------------------------------------------------------------------|--------------------------------------------------------------------------------------------------------------------------------------------------------------------------------------------------------------------------------------------------------------|-----------------------------------|
|  |  |  |         | galactose from ganglioside substrates and other glycoconjugates. | Mucopolysaccharidosis type IVB (Morquio)                                                                                                                                                                                                                     |                                   |
|  |  |  | CRTAP   | 605497                                                           | The protein encoded by this gene is similar to the chicken and mouse CRTAP genes. The encoded protein is a scaffolding protein that may influence the activity of at least one member of the cytohesin/ARNO family in response to specific cellular stimuli. | Osteogenesis imperfecta, type VII |
|  |  |  | FBXL2   | 605652                                                           | This gene encodes a member of the F-box protein family which is characterized by an approximately 40 amino acid motif, the F-box.                                                                                                                            |                                   |
|  |  |  | UBP1    | 609784                                                           | upstream binding protein 1 (LBP-1a)                                                                                                                                                                                                                          |                                   |
|  |  |  | CLASP2  | 605853                                                           | cytoplasmic linker associated protein 2                                                                                                                                                                                                                      |                                   |
|  |  |  | PDCD6IP | 608074                                                           | This gene encodes a protein that functions within the ESCRT pathway in the abscission stage of cytokinesis,                                                                                                                                                  |                                   |

|  |  |  |          |        |                                                                                                                                                                                                                                                                                                                    |  |
|--|--|--|----------|--------|--------------------------------------------------------------------------------------------------------------------------------------------------------------------------------------------------------------------------------------------------------------------------------------------------------------------|--|
|  |  |  |          |        | in intraluminal endosomal vesicle formation, and in enveloped virus budding.                                                                                                                                                                                                                                       |  |
|  |  |  | ARPP-21  | 605488 | The 21-kD cAMP-regulated phosphoprotein (ARPP21), also known as regulator of calmodulin (CaM; MIM 114180) signaling (RCS), plays a central role in integration of key neurotransmitter inputs into medium spiny neurons through its regulation of CaM-dependent kinase I (CaMKI) and protein phosphatase-2B (PP2B) |  |
|  |  |  | MIR128-2 | 611769 | microRNAs (miRNAs) are short (20-24 nt) non-coding RNAs that are involved in post-transcriptional regulation of gene expression in multicellular organisms by affecting both the stability and translation of mRNAs.                                                                                               |  |
|  |  |  | STAC     | 602317 | SH3 and cysteine rich domain                                                                                                                                                                                                                                                                                       |  |



|  |              |             |       |        |                                                                                                                                                                                                                                                |                                 |
|--|--------------|-------------|-------|--------|------------------------------------------------------------------------------------------------------------------------------------------------------------------------------------------------------------------------------------------------|---------------------------------|
|  | 12q13.13     | duplication |       |        |                                                                                                                                                                                                                                                |                                 |
|  |              |             | DIP2B | 611379 | This gene encodes a member of the disco-interacting protein homolog 2 protein family. The encoded protein contains a binding site for the transcriptional regulator DNA methyltransferase 1 associated protein 1 as well as AMP-binding sites. | Mental retardation, FRA12A type |
|  | 17p11.2      | duplication |       |        |                                                                                                                                                                                                                                                |                                 |
|  |              |             | GRAP  | 604330 | This gene encodes a member of the GRB2/Sem5/Drk family.                                                                                                                                                                                        |                                 |
|  | Xp22.33p22.2 | deletion    |       |        |                                                                                                                                                                                                                                                |                                 |
|  |              |             | ZBED1 | 300178 | zinc finger, BED-type containing 1                                                                                                                                                                                                             |                                 |
|  |              |             | CD99  | 313470 | The protein encoded by this gene is a cell surface glycoprotein involved in leukocyte migration, T-cell adhesion, ganglioside GM1 and transmembrane protein transport, and T-cell death by a caspase-independent pathway.                      |                                 |
|  |              |             | XG    | 314700 | This gene encodes the XG blood                                                                                                                                                                                                                 | [Blood group, XG system]        |

|  |  |  |      |                                                                                                     |                                                                                                                                                                                                                     |                                                  |
|--|--|--|------|-----------------------------------------------------------------------------------------------------|---------------------------------------------------------------------------------------------------------------------------------------------------------------------------------------------------------------------|--------------------------------------------------|
|  |  |  |      | group antigen, and is located at the pseudoautosomal boundary on the short (p) arm of chromosome X. |                                                                                                                                                                                                                     |                                                  |
|  |  |  | GYG2 | 300198                                                                                              | This gene encodes a member of the the glycogenin family.                                                                                                                                                            |                                                  |
|  |  |  | ARSD | 300002                                                                                              | The protein encoded by this gene is a member of the sulfatase family. Sulfatases are essential for the correct composition of bone and cartilage matrix.                                                            |                                                  |
|  |  |  | ARSE | 300180                                                                                              | Arylsulfatase E is a member of the sulfatase family. It is glycosylated postranslationally and localized to the golgi apparatus. Sulfatases are essential for the correct composition of bone and cartilage matrix. | Chondrodysplasia punctata,<br>X-linked recessive |
|  |  |  | ARSH | 300586                                                                                              | Sulfatases, such as ARSH, hydrolyze sulfate esters from sulfated steroids, carbohydrates, proteoglycans, and glycolipids.                                                                                           |                                                  |

|  |  |  |        |        |                                                                                                                                                                                                                                                                                                                                                                                               |                                                                                                                         |
|--|--|--|--------|--------|-----------------------------------------------------------------------------------------------------------------------------------------------------------------------------------------------------------------------------------------------------------------------------------------------------------------------------------------------------------------------------------------------|-------------------------------------------------------------------------------------------------------------------------|
|  |  |  | ARSF   | 300003 | <p>This gene is a member of the sulfatase family, and more specifically, the arylsulfatase subfamily.</p> <p>Members of the subfamily share similarity in sequence and splice sites, and are clustered together on chromosome X, suggesting that they are derived from recent gene duplication events. Sulfatases are essential for the correct composition of bone and cartilage matrix.</p> |                                                                                                                         |
|  |  |  | PRKX   | 300083 | <p>This gene encodes a serine threonine protein kinase that has similarity to the catalytic subunit of cyclic AMP dependent protein kinases.</p>                                                                                                                                                                                                                                              |                                                                                                                         |
|  |  |  | NLGN4X | 300427 | <p>This gene encodes a member of a family of neuronal cell surface proteins.</p>                                                                                                                                                                                                                                                                                                              | <p>Mental retardation, X-linked<br/> {Asperger syndrome susceptibility, X-linked 2}<br/> {Autism susceptibility, X-</p> |

|  |  |  |        |        |                                                                                                                                                                                                                  |                      |
|--|--|--|--------|--------|------------------------------------------------------------------------------------------------------------------------------------------------------------------------------------------------------------------|----------------------|
|  |  |  |        |        |                                                                                                                                                                                                                  | linked 2}            |
|  |  |  | VCX3A  | 300533 | VCX/Y genes encode small and highly charged proteins of unknown function.                                                                                                                                        |                      |
|  |  |  | HDHD1A | 306480 | This gene encodes a member of the haloacid dehalogenase-like (HAD) hydrolase superfamily.                                                                                                                        |                      |
|  |  |  | STS    | 300747 | The protein encoded by this gene catalyzes the conversion of sulfated steroid precursors to estrogens during pregnancy. The encoded protein is found in the endoplasmic reticulum, where it acts as a homodimer. | Ichthyosis, X-linked |
|  |  |  | VCX    | 300229 | VCX/Y genes encode small and highly charged proteins of unknown function.                                                                                                                                        |                      |
|  |  |  | PNPLA4 | 300102 | This gene encodes a member of the patatin-like family of phospholipases.                                                                                                                                         |                      |
|  |  |  | VCX2   | 300532 | VCX/Y genes encode small and                                                                                                                                                                                     |                      |

|  |  |  |        |        |                                                                                                                                                                                                                                         |                             |
|--|--|--|--------|--------|-----------------------------------------------------------------------------------------------------------------------------------------------------------------------------------------------------------------------------------------|-----------------------------|
|  |  |  |        |        | highly charged proteins of unknown function.                                                                                                                                                                                            |                             |
|  |  |  | KAL1   | 300836 | The encoded protein is similar in sequence to proteins known to function in neural cell adhesion and axonal migration.                                                                                                                  | Kallmann syndrome           |
|  |  |  | FAM9A  | 300477 | This gene is a member of a gene family which arose through duplication on the X chromosome. The encoded protein may be a nuclear protein that is localized to the nucleolus, and has some similarity to a synaptonemal complex protein. |                             |
|  |  |  | FAM9B  | 300478 | his gene is a member of a gene family which arose through duplication on the X chromosome.                                                                                                                                              |                             |
|  |  |  | TBL1X  | 300196 | The protein encoded by this gene has sequence similarity with members of the WD40 repeat-containing protein family.                                                                                                                     |                             |
|  |  |  | GPR143 | 300808 | This gene encodes a protein that                                                                                                                                                                                                        | Nystagmus 6, congenital, X- |

|           |                    |                 |       |        |                                                                                                                                                                                           |                                                                                                                                                                                                                                                       |
|-----------|--------------------|-----------------|-------|--------|-------------------------------------------------------------------------------------------------------------------------------------------------------------------------------------------|-------------------------------------------------------------------------------------------------------------------------------------------------------------------------------------------------------------------------------------------------------|
|           |                    |                 |       |        | binds to heterotrimeric G proteins and is targeted to melanosomes in pigment cells.                                                                                                       | linked<br>Ocular albinism, type I,<br>Nettleship-Falls type                                                                                                                                                                                           |
| <b>11</b> | <b>9q34.2q34.3</b> | <b>deletion</b> |       |        |                                                                                                                                                                                           |                                                                                                                                                                                                                                                       |
|           |                    |                 | POMT1 | 607423 | The protein encoded by this gene is an O-mannosyltransferase that requires interaction with the product of the POMT2 gene for enzymatic function.                                         | Muscular dystrophy-dystroglycanopathy (congenital with brain and eye anomalies), type A, 1<br>Muscular dystrophy-dystroglycanopathy (congenital with mental retardation), type B, 1<br>Muscular dystrophy-dystroglycanopathy (limb-girdle), type C, 1 |
|           |                    |                 | UCK1  | 609328 | Uridine/cytidine kinase-1 (EC 2.7.1.48) is a pyrimidine ribonucleoside kinase that catalyzes the phosphorylation of uridine and cytidine to form uridine monophosphate (UMP) and cytidine |                                                                                                                                                                                                                                                       |

|  |  |  |         |         |                                                                                                                                                                                 |                                                                      |
|--|--|--|---------|---------|---------------------------------------------------------------------------------------------------------------------------------------------------------------------------------|----------------------------------------------------------------------|
|  |  |  |         |         | monophosphate (CMP)                                                                                                                                                             |                                                                      |
|  |  |  | RAPGEF1 | 600303  | This gene encodes a human guanine nucleotide exchange factor.                                                                                                                   |                                                                      |
|  |  |  | MED27   | 605044  | The protein encoded by this gene is a subunit of the CRSP (cofactor required for SP1 activation) complex, which, along with TFIID, is required for efficient activation by SP1. |                                                                      |
|  |  |  | SETX    | 608465  | This gene encodes a protein named for its homology to the Sen1p protein of fungi which has RNA helicase activity encoded by a domain at the C-terminal end of the protein.      | Amyotrophic lateral sclerosis 4, juvenile<br>Ataxia-ocular apraxia-2 |
|  |  |  | TTF1    | 600 777 | This gene encodes a transcription termination factor that is localized to the nucleolus and plays a critical role in ribosomal gene transcription.                              |                                                                      |
|  |  |  | BARHL1  | 605211  | BarH-like homeobox 1                                                                                                                                                            |                                                                      |
|  |  |  | GTF3C4  | 604892  | general transcription factor IIIC, polypeptide 4, 90kDa                                                                                                                         |                                                                      |

|  | 16p13.3 | deletion |        |        |                                                                                                                                                                                                                      |  |
|--|---------|----------|--------|--------|----------------------------------------------------------------------------------------------------------------------------------------------------------------------------------------------------------------------|--|
|  |         |          | FBXL16 | 609082 | F-box and leucine-rich repeat protein<br>16                                                                                                                                                                          |  |
|  |         |          | METR1  | 610998 | Meteorin regulates glial cell differentiation and promotes the formation of axonal networks during neurogenesis                                                                                                      |  |
|  |         |          | NARFL  | 611118 | nuclear prelamin A recognition factor-like                                                                                                                                                                           |  |
|  |         |          | MSLN   | 601051 | This gene encodes a precursor protein that is cleaved into two products, megakaryocyte potentiating factor and mesothelin.                                                                                           |  |
|  |         |          | CHTF18 | 613201 | CHTF18, CHTF8 (MIM 613202), and DCC1 (DSCC1; MIM 613203) are components of an alternative replication factor C (RFC) (see MIM 600404) complex that loads PCNA (MIM 176740) onto DNA during S phase of the cell cycle |  |



|  |              |          |        |        |                                                                                                                                                                                                          |                             |
|--|--------------|----------|--------|--------|----------------------------------------------------------------------------------------------------------------------------------------------------------------------------------------------------------|-----------------------------|
|  |              |          | GNG13  | 607298 | Heterotrimeric G proteins, which consist of alpha (see MIM 139320), beta (see MIM 139380), and gamma subunits, function as signal transducers for the 7-transmembrane-helix G protein-coupled receptors. |                             |
|  |              |          | LMF1   | 611761 | The protein encoded by this gene resides in the endoplasmic reticulum, and is involved in the maturation and transport of lipoprotein lipase through the secretory pathway.                              | Lipase deficiency, combined |
|  |              |          | SOX8   | 605923 | This gene encodes a member of the SOX (SRY-related HMG-box) family of transcription factors involved in the regulation of embryonic development and in the determination of the cell fate.               |                             |
|  | 21q22.3q22.3 | deletion |        |        |                                                                                                                                                                                                          |                             |
|  |              |          | UMODL1 | 613859 | uromodulin-like 1                                                                                                                                                                                        |                             |
|  |              |          | ABCG1  | 603076 | The protein encoded by this gene is a                                                                                                                                                                    |                             |

|  |  |  |      |        |                                                                                                                                                                                                                                             |  |
|--|--|--|------|--------|---------------------------------------------------------------------------------------------------------------------------------------------------------------------------------------------------------------------------------------------|--|
|  |  |  |      |        | member of the superfamily of ATP-binding cassette (ABC) transporters.                                                                                                                                                                       |  |
|  |  |  | TFF3 | 600633 | Members of the trefoil family are characterized by having at least one copy of the trefoil motif, a 40-amino acid domain that contains three conserved disulfides. They are stable secretory proteins expressed in gastrointestinal mucosa. |  |
|  |  |  | TFF2 | 182590 | Members of the trefoil family are characterized by having at least one copy of the trefoil motif, a 40-amino acid domain that contains three conserved disulfides. They are stable secretory proteins expressed in gastrointestinal mucosa. |  |
|  |  |  | TFF1 | 113710 | Members of the trefoil family are characterized by having at least one copy of the trefoil motif, a 40-amino acid domain that contains three conserved disulfides. They are stable                                                          |  |

|  |  |  |         |        |                                                                                                                                                                   |                                                                                               |
|--|--|--|---------|--------|-------------------------------------------------------------------------------------------------------------------------------------------------------------------|-----------------------------------------------------------------------------------------------|
|  |  |  |         |        | secretory proteins expressed in gastrointestinal mucosa.                                                                                                          |                                                                                               |
|  |  |  | TMPRSS3 | 605511 | This gene encodes a protein that belongs to the serine protease family.                                                                                           | Deafness, autosomal recessive 10, congenital Deafness, autosomal recessive 8, childhood onset |
|  |  |  | UBASH3A | 605736 | This gene encodes one of two family members belonging to the T-cell ubiquitin ligand (TULA) family. Both family members can negatively regulate T-cell signaling. |                                                                                               |
|  |  |  | RSPH1   | 609314 | radial spoke head 1 homolog (Chlamydomonas)                                                                                                                       |                                                                                               |
|  |  |  | SLC37A1 | 608094 | solute carrier family 37 (glycerol-3-phosphate transporter), member 1                                                                                             |                                                                                               |
|  |  |  | PDE9A   | 602973 | The encoded protein plays a role in signal transduction by regulating the intracellular concentration of these cyclic nucleotides.                                |                                                                                               |
|  |  |  | WDR4    | 605924 | This gene encodes a member of the WD repeat protein family. WD                                                                                                    |                                                                                               |

|  |  |  |        |        |                                                                                                                                                                                                                                                                                                                                                                                         |                                                                              |
|--|--|--|--------|--------|-----------------------------------------------------------------------------------------------------------------------------------------------------------------------------------------------------------------------------------------------------------------------------------------------------------------------------------------------------------------------------------------|------------------------------------------------------------------------------|
|  |  |  |        |        | <p>repeats are minimally conserved regions of approximately 40 amino acids typically bracketed by gly-his and trp-aspartic acid (GH-WD), which may facilitate formation of heterotrimeric or multiprotein complexes. Members of this family are involved in a variety of cellular processes, including cell cycle progression, signal transduction, apoptosis, and gene regulation.</p> |                                                                              |
|  |  |  | NDUFV3 | 602184 | <p>The encoded protein is one of three proteins found in the flavoprotein fraction of the complex. The specific function of the encoded protein is unknown.</p>                                                                                                                                                                                                                         |                                                                              |
|  |  |  | PKNOX1 | 602100 | PBX/knotted 1 homeobox 1                                                                                                                                                                                                                                                                                                                                                                |                                                                              |
|  |  |  | CBS    | 613381 | <p>The protein encoded by this gene acts as a homotetramer to catalyze the conversion of homocysteine to cystathionine, the first step in the</p>                                                                                                                                                                                                                                       | <p>Homocystinuria, B6-responsive and nonresponsive types<br/>Thrombosis,</p> |

|  |  |  |       |        |                                                                                                                                                                                                                                                                                                                                                                                                                                      |                                                                                                                                            |
|--|--|--|-------|--------|--------------------------------------------------------------------------------------------------------------------------------------------------------------------------------------------------------------------------------------------------------------------------------------------------------------------------------------------------------------------------------------------------------------------------------------|--------------------------------------------------------------------------------------------------------------------------------------------|
|  |  |  |       |        | transsulfuration pathway.                                                                                                                                                                                                                                                                                                                                                                                                            | hyperhomocysteinemic                                                                                                                       |
|  |  |  | U2AF1 | 191317 | This gene encodes the small subunit which plays a critical role in both constitutive and enhancer-dependent RNA splicing by directly mediating interactions between the large subunit and proteins bound to the enhancers                                                                                                                                                                                                            |                                                                                                                                            |
|  |  |  | CRYAA | 123580 | Alpha crystallins are composed of two gene products: alpha-A and alpha-B, for acidic and basic, respectively. Alpha crystallins can be induced by heat shock and are members of the small heat shock protein (sHSP also known as the HSP20) family. They act as molecular chaperones although they do not renature proteins and release them in the fashion of a true chaperone; instead they hold them in large soluble aggregates. | Cataract, autosomal dominant nuclear<br>Cataract, congenital, autosomal recessive<br>Cataract, zonular central nuclear, autosomal dominant |

|  |  |  |        |        |                                                                                                                                                                                                                                                               |                                                              |
|--|--|--|--------|--------|---------------------------------------------------------------------------------------------------------------------------------------------------------------------------------------------------------------------------------------------------------------|--------------------------------------------------------------|
|  |  |  | SIK1   | 605705 | salt-inducible kinase 1                                                                                                                                                                                                                                       |                                                              |
|  |  |  | HSF2BP | 604554 | heat shock transcription factor 2 binding protein                                                                                                                                                                                                             |                                                              |
|  |  |  | RRP1B  | 610654 | ribosomal RNA processing 1 homolog B ( <i>S. cerevisiae</i> )                                                                                                                                                                                                 |                                                              |
|  |  |  | PDXK   | 179020 | The protein encoded by this gene phosphorylates vitamin B6, a step required for the conversion of vitamin B6 to pyridoxal-5-phosphate, an important cofactor in intermediary metabolism. The encoded protein is cytoplasmic and probably acts as a homodimer. |                                                              |
|  |  |  | CSTB   | 601145 | This gene encodes a stefin that functions as an intracellular thiol protease inhibitor.                                                                                                                                                                       | Epilepsy, progressive myoclonic 1A (Unverricht and Lundborg) |
|  |  |  | RRP1   | 610653 | The protein encoded by this gene is the putative homolog of the yeast ribosomal RNA processing protein RRP1. The encoded protein is involved in the late stages of                                                                                            |                                                              |

|           |                     |                 |        |        |                                                                                                                                                                                                     |  |
|-----------|---------------------|-----------------|--------|--------|-----------------------------------------------------------------------------------------------------------------------------------------------------------------------------------------------------|--|
|           |                     |                 |        |        | nucleologenesis at the end of mitosis, and may be required for the generation of 28S rRNA.                                                                                                          |  |
| <b>12</b> | <b>3p22.1p21.32</b> | <b>deletion</b> |        |        |                                                                                                                                                                                                     |  |
|           |                     |                 | CCK    | 118440 | Cholecystikinin is a brain/gut peptide. In the gut, it induces the release of pancreatic enzymes and the contraction of the gallbladder. In the brain, its physiologic role is unclear.             |  |
|           |                     |                 | LYZL4  | 612750 | Lysozymes (see LYZ; MIM 153450), especially C-type lysozymes, are well-recognized bacteriolytic factors widely distributed in the animal kingdom and play a mainly protective role in host defense. |  |
|           |                     |                 | VIPR1  | 192321 | his gene encodes a receptor for vasoactive intestinal peptide, a small neuropeptide.                                                                                                                |  |
|           |                     |                 | SEC22C | 604028 | This gene encodes a member of the SEC22 family of vesicle trafficking                                                                                                                               |  |

|  |  |  |        |        |                                                                                                                                                  |  |
|--|--|--|--------|--------|--------------------------------------------------------------------------------------------------------------------------------------------------|--|
|  |  |  |        |        | proteins. The encoded protein is localized to the endoplasmic reticulum and may play a role in the early stages of ER-Golgi protein trafficking. |  |
|  |  |  | SS18L2 | 606473 | Synovial sarcomas occur most frequently in the extremities around large joints.                                                                  |  |
|  |  |  | NKTR   | 161565 | This gene encodes a membrane-anchored protein with a hydrophobic amino terminal domain and a cyclophilin-like PPlase domain.                     |  |
|  |  |  | HHATL  | 608116 | hedgehog acyltransferase-like                                                                                                                    |  |
|  |  |  | CCBP2  | 602648 | This gene encodes a beta chemokine receptor, which is predicted to be a seven transmembrane protein similar to G protein-coupled receptors.      |  |
|  |  |  | CYP8B1 | 602172 | This gene encodes a member of the cytochrome P450 superfamily of enzymes.                                                                        |  |
|  |  |  | SNRK   | 612760 | SNF related kinase                                                                                                                               |  |



|  |  |  |          |        |                                                                                                                                                                                                                                              |                                                |
|--|--|--|----------|--------|----------------------------------------------------------------------------------------------------------------------------------------------------------------------------------------------------------------------------------------------|------------------------------------------------|
|  |  |  | ANO10    | 613726 | The transmembrane protein encoded by this gene is a member of a family of calcium-activated chloride channels.                                                                                                                               | Spinocerebellar ataxia, autosomal recessive 10 |
|  |  |  | ABHD5    | 604780 | The protein encoded by this gene belongs to a large family of proteins defined by an alpha/beta hydrolase fold, and contains three sequence motifs that correspond to a catalytic triad found in the esterase/lipase/thioesterase subfamily. | Chanarin-Dorfman syndrome                      |
|  |  |  | MIR138-1 | 613394 | microRNAs (miRNAs) are short (20-24 nt) non-coding RNAs that are involved in post-transcriptional regulation of gene expression in multicellular organisms by affecting both the stability and translation of mRNAs.                         |                                                |
|  |  |  | ZNF35    | 194533 | zinc finger protein 3                                                                                                                                                                                                                        |                                                |
|  |  |  |          |        |                                                                                                                                                                                                                                              |                                                |

| 13 | 16p13.3 | duplication |         |        |                                                                                                                                                                                              |  |
|----|---------|-------------|---------|--------|----------------------------------------------------------------------------------------------------------------------------------------------------------------------------------------------|--|
|    |         |             | SOLH    | 603267 | This gene encodes a protein containing zinc-finger-like repeats and a calpain-like protease domain.                                                                                          |  |
|    |         |             | PIGQ    | 605754 | This gene is involved in the first step in glycosylphosphatidylinositol (GPI)-anchor biosynthesis.                                                                                           |  |
|    |         |             | WFIKKN1 | 608021 | This gene encodes a secreted multidomain protein consisting of a signal peptide, a WAP domain, a follistatin domain, an immunoglobulin domain, two tandem Kunitz domains, and an NTR domain. |  |
|    |         |             | RHOT2   | 613889 | This gene encodes a member of the Rho family of GTPases.                                                                                                                                     |  |
|    |         |             | RHBDL1  | 603264 | rhomboid, veinlet-like 1 (Drosophila)                                                                                                                                                        |  |
|    |         |             | STUB1   | 607207 | STUB1, or CHIP, is a ubiquitin ligase/cochaperone that participates in protein quality control by targeting a broad range of chaperone protein substrates for degradation                    |  |

|           |                    |                    |        |        |                                                                                                                                                               |                                    |
|-----------|--------------------|--------------------|--------|--------|---------------------------------------------------------------------------------------------------------------------------------------------------------------|------------------------------------|
|           |                    |                    | FBXL16 | 609082 | F-box and leucine-rich repeat protein<br>16                                                                                                                   |                                    |
|           |                    |                    | METRN  | 610998 | Meteorin regulates glial cell differentiation and promotes the formation of axonal networks during neurogenesis                                               |                                    |
|           | Xp11.23            | duplication        |        |        |                                                                                                                                                               |                                    |
|           |                    |                    | ZNF81  | 314998 | This gene encodes a protein that likely functions as a transcription factor.                                                                                  | Mental retardation, X-linked<br>45 |
|           |                    |                    | ZNF182 | 314993 | Zinc-finger proteins bind nucleic acids and play important roles in various cellular functions, including cell proliferation, differentiation, and apoptosis. |                                    |
| <b>15</b> | <b>10q25.2qter</b> | <b>duplication</b> |        |        |                                                                                                                                                               |                                    |
|           |                    |                    | DUSP5  | 603069 | This gene product inactivates ERK1, is expressed in a variety of tissues with the highest levels in pancreas and brain, and is localized in the               |                                    |

|  |  |  |        |        |                                                                                                                                                                           |                                             |
|--|--|--|--------|--------|---------------------------------------------------------------------------------------------------------------------------------------------------------------------------|---------------------------------------------|
|  |  |  |        |        | nucleus.                                                                                                                                                                  |                                             |
|  |  |  | SMC3   | 606062 | The encoded protein occurs in certain cell types as either an intracellular, nuclear protein or a secreted protein.                                                       | Cornelia de Lange syndrome 3                |
|  |  |  | RBM20  | 613171 | This gene encodes a protein that likely binds RNA                                                                                                                         | Cardiomyopathy, dilated, 1DD                |
|  |  |  | PDCD4  | 608610 | This gene is a tumor suppressor and encodes a protein that binds to the eukaryotic translation initiation factor 4A1 and inhibits its function by preventing RNA binding. |                                             |
|  |  |  | BBIP1  | 613605 | BBSome interacting protein 1                                                                                                                                              |                                             |
|  |  |  | SHOC2  | 602775 | soc-2 suppressor of clear homolog (C. elegans)                                                                                                                            | Noonan-like syndrome with loose anagen hair |
|  |  |  | ADRA2A | 104210 | This gene encodes alpha2A subtype and it contains no introns in either its coding or untranslated sequences.                                                              |                                             |
|  |  |  | GPAM   | 602395 | This gene encodes a mitochondrial enzyme which prefers saturated fatty acids as its substrate for the synthesis of glycerolipids.                                         |                                             |

|  |  |  |         |        |                                                                                                                                                |                                                                                      |
|--|--|--|---------|--------|------------------------------------------------------------------------------------------------------------------------------------------------|--------------------------------------------------------------------------------------|
|  |  |  | TECTB   | 602653 | The genes for alpha-tectorin (MIM 602574) and beta-tectorin encode the major noncollagenous proteins of the tectorial membrane of the cochlea. |                                                                                      |
|  |  |  | ACSL5   | 605677 | The protein encoded by this gene is an isozyme of the long-chain fatty-acid-coenzyme A ligase family.                                          |                                                                                      |
|  |  |  | TCF7L2  | 602228 | transcription factor 7-like 2 (T-cell specific, HMG-box)                                                                                       | {Diabetes mellitus, type 2, susceptibility to}                                       |
|  |  |  | HABP2   | 603924 | The protein encoded by this gene is an extracellular serine protease that binds hyaluronic acid and is involved in cell adhesion.              | {Carotid stenosis, susceptibility to}<br>{Venous thromboembolism, susceptibility to} |
|  |  |  | NRAP    | 602873 | nebulin-related anchoring protein                                                                                                              |                                                                                      |
|  |  |  | CASP7   | 601761 | This gene encodes a protein which is a member of the cysteine-aspartic acid protease (caspase) family.                                         |                                                                                      |
|  |  |  | DCLRE1A | 609682 | DNA cross-link repair 1A                                                                                                                       |                                                                                      |
|  |  |  | ADRB1   | 109630 | Specific polymorphisms in this gene have been shown to affect the resting heart rate and can be involved in                                    | [Resting heart rate] 607276<br>{Congestive heart failure and beta-blocker response,  |

|  |  |         |        |                                                                                                                                                                                                                                         |              |
|--|--|---------|--------|-----------------------------------------------------------------------------------------------------------------------------------------------------------------------------------------------------------------------------------------|--------------|
|  |  |         |        | heart failure.                                                                                                                                                                                                                          | modifier of} |
|  |  | TDRD1   | 605796 | This gene is similar to a mouse gene that encodes a tudor domain protein.                                                                                                                                                               |              |
|  |  | AFAP1L2 | 612420 | actin filament associated protein 1-like 2                                                                                                                                                                                              |              |
|  |  | ABLIM1  | 602330 | This gene encodes a cytoskeletal LIM protein that binds to actin filaments via a domain that is homologous to erythrocyte dematin.                                                                                                      |              |
|  |  | TRUB1   | 610726 | TruB pseudouridine (psi) synthase homolog 1 (E. coli)                                                                                                                                                                                   |              |
|  |  | ATRNL1  | 612869 | attractin-like 1                                                                                                                                                                                                                        |              |
|  |  | GFRA1   | 601496 | The protein encoded by this gene is a member of the GDNF receptor family.<br>It is a glycosylphosphatidylinositol(GPI)-linked cell surface receptor for both GDNF and NTN, and mediates activation of the RET tyrosine kinase receptor. |              |

|  |  |  |          |        |                                                                                                                                                                                                    |                                                         |
|--|--|--|----------|--------|----------------------------------------------------------------------------------------------------------------------------------------------------------------------------------------------------|---------------------------------------------------------|
|  |  |  | PNLIP    | 246600 | This gene is a member of the lipase gene family. It encodes a carboxyl esterase that hydrolyzes insoluble, emulsified triglycerides, and is essential for the efficient digestion of dietary fats. | Pancreatic lipase deficiency                            |
|  |  |  | PNLIPRP1 | 604422 | pancreatic lipase-related protein 1                                                                                                                                                                |                                                         |
|  |  |  | PNLIPRP2 | 604423 | pancreatic lipase-related protein 2                                                                                                                                                                |                                                         |
|  |  |  | HSPA12A  | 610701 | heat shock 70kDa protein 12A                                                                                                                                                                       |                                                         |
|  |  |  | KIAA1598 | 611171 | KIAA1598                                                                                                                                                                                           |                                                         |
|  |  |  | VAX1     | 604294 | This gene encodes a homeo-domain containing protein from a class of homeobox transcription factors which are conserved in vertebrates.                                                             |                                                         |
|  |  |  | KCNK18   | 613655 | This gene encodes a member of the superfamily of potassium channel proteins containing two pore-forming P domains and the encoded protein functions as an outward rectifying potassium channel.    | {Migraine, with or without aura, susceptibility to, 13} |

|  |  |  |           |        |                                                                                                                               |                |
|--|--|--|-----------|--------|-------------------------------------------------------------------------------------------------------------------------------|----------------|
|  |  |  | SLC18A2   | 193001 | solute carrier family 18 (vesicular monoamine), member 2                                                                      |                |
|  |  |  | PDZD8     | 614235 | PDZ domain containing 8                                                                                                       |                |
|  |  |  | EMX2OS    | 607637 | EMX2 opposite strand/antisense RNA (non-protein coding)                                                                       |                |
|  |  |  | EMX2      | 600035 | This gene encodes a homeobox-containing transcription factor that is the homolog to the 'empty spiracles' gene in Drosophila. | Schizencephaly |
|  |  |  | RAB11FIP2 | 608599 | RAB11 family interacting protein 2 (class I)                                                                                  |                |
|  |  |  | CASC2     | 608598 | cancer susceptibility candidate 2 (non-protein coding)                                                                        |                |
|  |  |  | PRLHR     | 600895 | prolactin releasing hormone receptor                                                                                          |                |
|  |  |  | NANOS1    | 608226 | nanos homolog 1 (Drosophila)                                                                                                  |                |
|  |  |  | EIF3A     | 602039 | eukaryotic translation initiation factor 3, subunit A                                                                         |                |
|  |  |  | PRDX3     | 604769 | This gene encodes a protein with antioxidant function and is localized in the mitochondrion.                                  |                |



|  |  |  |       |        |                                                                                                                                                                                                                                             |                                                            |
|--|--|--|-------|--------|---------------------------------------------------------------------------------------------------------------------------------------------------------------------------------------------------------------------------------------------|------------------------------------------------------------|
|  |  |  | GRK5  | 600870 | This gene encodes a member of the guanine nucleotide-binding protein (G protein)-coupled receptor kinase subfamily of the Ser/Thr protein kinase family.                                                                                    |                                                            |
|  |  |  | RGS10 | 602856 | This protein associates specifically with the activated forms of the two related G-protein subunits, G-alpha <sub>i3</sub> and G-alpha <sub>z</sub> but fails to interact with the structurally and functionally distinct G-alpha subunits. |                                                            |
|  |  |  | TIAL1 | 603413 | The protein encoded by this gene is a member of a family of RNA-binding proteins, has three RNA recognition motifs (RRMs), and binds adenine and uridine-rich elements in mRNA and pre-mRNAs of a wide range of genes.                      |                                                            |
|  |  |  | BAG3  | 603883 | The protein encoded by this gene contains a WW domain in the N-terminal region and a BAG domain in                                                                                                                                          | Cardiomyopathy, dilated,<br>1HH<br>Myopathy, myofibrillar, |

|  |  |  |           |                                                                                                                                                                  |                                                                                                                                                                                                                                                       |  |
|--|--|--|-----------|------------------------------------------------------------------------------------------------------------------------------------------------------------------|-------------------------------------------------------------------------------------------------------------------------------------------------------------------------------------------------------------------------------------------------------|--|
|  |  |  |           | <p>the C-terminal region.</p> <p>The BAG domains of BAG1, BAG2, and BAG3 interact specifically with the Hsc70 ATPase domain in vitro and in mammalian cells.</p> | BAG3-related                                                                                                                                                                                                                                          |  |
|  |  |  | INPP5F    | 609389                                                                                                                                                           | <p>The protein encoded by this gene is an inositol 1,4,5-trisphosphate (InsP3) 5-phosphatase and contains a Sac domain.</p>                                                                                                                           |  |
|  |  |  | C10orf119 | 610909                                                                                                                                                           | <p>This gene encodes a protein which is a component of the hexameric minichromosome maintenance (MCM) complex which regulates initiation and elongation of DNA.</p>                                                                                   |  |
|  |  |  | WDR11     | 606417                                                                                                                                                           | <p>This gene encodes a member of the WD repeat protein family. WD repeats are minimally conserved regions of approximately 40 amino acids typically bracketed by gly-his and trp-asp (GH-WD), which may facilitate formation of heterotrimeric or</p> |  |

|  |  |  |              |               |                                                                                                                                                                                              |                                                                                                                                                                                                                                                                                                                                                                                                                                                                                                                             |
|--|--|--|--------------|---------------|----------------------------------------------------------------------------------------------------------------------------------------------------------------------------------------------|-----------------------------------------------------------------------------------------------------------------------------------------------------------------------------------------------------------------------------------------------------------------------------------------------------------------------------------------------------------------------------------------------------------------------------------------------------------------------------------------------------------------------------|
|  |  |  |              |               | <p>multiprotein complexes.</p>                                                                                                                                                               |                                                                                                                                                                                                                                                                                                                                                                                                                                                                                                                             |
|  |  |  | <p>FGFR2</p> | <p>176943</p> | <p>The protein encoded by this gene is a member of the fibroblast growth factor receptor family, where amino acid sequence is highly conserved between members and throughout evolution.</p> | <p>Antley-Bixler syndrome without genital anomalies or disordered steroidogenesis</p> <p>Apert syndrome</p> <p>Beare-Stevenson cutis gyrata syndrome</p> <p>Craniofacial-skeletal-dermatologic dysplasia</p> <p>Craniosynostosis, nonspecific</p> <p>Crouzon syndrome</p> <p>Gastric cancer, somatic</p> <p>Jackson-Weiss syndrome</p> <p>LADD syndrome</p> <p>Pfeiffer syndrome</p> <p>Saethre-Chotzen syndrome</p> <p>Scaphocephaly and Axenfeld-Rieger anomaly</p> <p>Scaphocephaly, maxillary retrusion, and mental</p> |

|  |  |  |         |        |                                                                                                                                                                 |                                              |
|--|--|--|---------|--------|-----------------------------------------------------------------------------------------------------------------------------------------------------------------|----------------------------------------------|
|  |  |  |         |        |                                                                                                                                                                 | retardation                                  |
|  |  |  | ATE1    | 607103 | This gene encodes an arginyltransferase, an enzyme that is involved in posttranslational conjugation of arginine to N-terminal aspartate or glutamate residues. |                                              |
|  |  |  | NSMCE4A | 612987 | non-SMC element 4 homolog A ( <i>S. cerevisiae</i> )                                                                                                            |                                              |
|  |  |  | TACC2   | 605302 | This gene encodes a protein that concentrates at centrosomes throughout the cell cycle.                                                                         |                                              |
|  |  |  | PLEKHA1 | 607772 | This gene encodes a pleckstrin homology domain-containing adapter protein.                                                                                      | {Age-related maculopathy, susceptibility to} |

|  |  |  |        |        |                                                                                                                                                                                                                      |                                                                                                 |
|--|--|--|--------|--------|----------------------------------------------------------------------------------------------------------------------------------------------------------------------------------------------------------------------|-------------------------------------------------------------------------------------------------|
|  |  |  | ARMS2  | 611313 | his gene encodes a protein that is thought to play a role in diseases in the elderly.                                                                                                                                | {Macular degeneration, age-related, 8}                                                          |
|  |  |  | HTRA1  | 602194 | This gene encodes a member of the trypsin family of serine proteases.                                                                                                                                                | {Macular degeneration, age-related, 7}<br>{Macular degeneration, age-related, neovascular type} |
|  |  |  | DMBT1  | 601969 | Loss of sequences from human chromosome 10q has been associated with the progression of human cancers.                                                                                                               |                                                                                                 |
|  |  |  | PSTK   | 611310 | phosphoseryl-tRNA kinase                                                                                                                                                                                             |                                                                                                 |
|  |  |  | IKZF5  | 606238 | IKAROS family zinc finger 5 (Pegasus)                                                                                                                                                                                |                                                                                                 |
|  |  |  | ACADSB | 600301 | Short/branched chain acyl-CoA dehydrogenase(ACADSB) is a member of the acyl-CoA dehydrogenase family of enzymes that catalyze the dehydrogenation of acyl-CoA derivatives in the metabolism of fatty acids or branch | 2-methylbutyrylglycinuria                                                                       |

|  |  |  |         |                        |                                                                                                                                                                                                                                 |                                                                   |
|--|--|--|---------|------------------------|---------------------------------------------------------------------------------------------------------------------------------------------------------------------------------------------------------------------------------|-------------------------------------------------------------------|
|  |  |  |         | chained amino acids. S |                                                                                                                                                                                                                                 |                                                                   |
|  |  |  | HMX3    | 613380                 | H6 family homeobox 3                                                                                                                                                                                                            |                                                                   |
|  |  |  | HMX2    | 600647                 | H6 family homeobox 2                                                                                                                                                                                                            |                                                                   |
|  |  |  | BUB3    | 603719                 | his gene encodes a protein involved in spindle checkpoint function.                                                                                                                                                             |                                                                   |
|  |  |  | GPR26   | 604847                 | G protein-coupled receptor 26                                                                                                                                                                                                   |                                                                   |
|  |  |  | CHST15  | 608277                 | carbohydrate (N-acetylgalactosamine 4-sulfate 6-O) sulfotransferase 15                                                                                                                                                          |                                                                   |
|  |  |  | OAT     | 613349                 | This gene encodes the mitochondrial enzyme ornithine aminotransferase, which is a key enzyme in the pathway that converts arginine and ornithine into the major excitatory and inhibitory neurotransmitters glutamate and GABA. | Gyrate atrophy of choroid and retina with or without ornithinemia |
|  |  |  | FAM175B | 611144                 | family with sequence similarity 175, member B                                                                                                                                                                                   |                                                                   |
|  |  |  | ZRANB1  | 611749                 | zinc finger, RAN-binding domain containing 1                                                                                                                                                                                    |                                                                   |
|  |  |  | CTBP2   | 602619                 | This gene produces alternative transcripts encoding two distinct                                                                                                                                                                |                                                                   |

|  |  |  |       |        |                                                                                                                                                                                                                                                               |                                      |
|--|--|--|-------|--------|---------------------------------------------------------------------------------------------------------------------------------------------------------------------------------------------------------------------------------------------------------------|--------------------------------------|
|  |  |  |       |        | proteins. One protein is a transcriptional repressor, while the other isoform is a major component of specialized synapses known as synaptic ribbons.                                                                                                         |                                      |
|  |  |  | MMP21 | 608416 | This gene encodes a member of the matrix metalloproteinase family.                                                                                                                                                                                            |                                      |
|  |  |  | UROS  | 606938 | The protein encoded by this gene catalyzes the fourth step of porphyrin biosynthesis in the heme biosynthetic pathway.                                                                                                                                        | Porphyria, congenital erythropoietic |
|  |  |  | BCCIP | 611883 | This gene product was isolated on the basis of its interaction with BRCA2 and p21 proteins.                                                                                                                                                                   |                                      |
|  |  |  | DHX32 | 607960 | DEAD box proteins, characterized by the conserved motif Asp-Glu-Ala-Asp (DEAD), are putative RNA helicases. They are implicated in a number of cellular processes involving alteration of RNA secondary structure such as translation initiation, nuclear and |                                      |

|  |  |  |        |        |                                                                                                              |  |
|--|--|--|--------|--------|--------------------------------------------------------------------------------------------------------------|--|
|  |  |  |        |        | mitochondrial splicing, and ribosome and spliceosome assembly.                                               |  |
|  |  |  | FANK1  | 611640 | fibronectin type III and ankyrin repeat domains 1                                                            |  |
|  |  |  | ADAM12 | 602714 | This gene encodes a member of the ADAM (a disintegrin and metalloprotease) protein family.                   |  |
|  |  |  | DOCK1  | 601403 | dedicator of cytokinesis 1                                                                                   |  |
|  |  |  | NPS    | 609513 | neuropeptide S                                                                                               |  |
|  |  |  | PTPRE  | 600926 | The protein encoded by this gene is a member of the protein tyrosine phosphatase (PTP) family.               |  |
|  |  |  | MKI67  | 176741 | This gene encodes a nuclear protein that is associated with and may be necessary for cellular proliferation. |  |
|  |  |  | MGMT   | 156569 | O-6-methylguanine-DNA methyltransferase                                                                      |  |
|  |  |  | EBF3   | 607407 | This gene encodes a member of the early B-cell factor (EBF) family of DNA binding transcription factors.     |  |
|  |  |  | GLRX3  | 612754 | This gene encodes a member of the                                                                            |  |



|  |  |  |         |        |                                                                                                                                               |  |
|--|--|--|---------|--------|-----------------------------------------------------------------------------------------------------------------------------------------------|--|
|  |  |  |         |        | glutaredoxin family.                                                                                                                          |  |
|  |  |  | PPP2R2D | 613992 | protein phosphatase 2, regulatory subunit B, delta                                                                                            |  |
|  |  |  | BNIP3   | 603293 | his gene is a member of the BCL2/adenovirus E1B 19 kd-interacting protein (BNIP) family.                                                      |  |
|  |  |  | JAKMIP3 | 611198 | Janus kinase and microtubule interacting protein 3                                                                                            |  |
|  |  |  | DPYSL4  | 608407 | dihydropyrimidinase-like 4                                                                                                                    |  |
|  |  |  | INPP5A  | 600106 | The protein encoded by this gene is a membrane-associated type I inositol 1,4,5-trisphosphate (InsP3) 5-phosphatase.                          |  |
|  |  |  | NKX6-2  | 605955 | NK6 homeobox 2                                                                                                                                |  |
|  |  |  | GPR123  | 612302 | G protein-coupled receptor 123                                                                                                                |  |
|  |  |  | UTF1    | 604130 | undifferentiated embryonic cell transcription factor 1                                                                                        |  |
|  |  |  | VENTX   | 607158 | This gene encodes a member of the Vent family of homeodomain proteins. The encoded protein may function as a transcriptional repressor and be |  |

|  |             |          |       |        |                                                                                                                                                         |                                                                                                                               |
|--|-------------|----------|-------|--------|---------------------------------------------------------------------------------------------------------------------------------------------------------|-------------------------------------------------------------------------------------------------------------------------------|
|  |             |          |       |        | involved in mesodermal patterning and hemopoietic stem cell maintenance.                                                                                |                                                                                                                               |
|  |             |          | ADAM8 | 602267 | This gene encodes a member of the ADAM (a disintegrin and metalloprotease domain) family.                                                               |                                                                                                                               |
|  |             |          | CALY  | 604647 | The protein encoded by this gene is a type II single transmembrane protein.                                                                             |                                                                                                                               |
|  |             |          | PRAP1 | 609776 | proline-rich acidic protein 1                                                                                                                           |                                                                                                                               |
|  |             |          | ECHS1 | 602292 | The protein encoded by this gene functions in the second step of the mitochondrial fatty acid beta-oxidation pathway.                                   |                                                                                                                               |
|  | 13q33.3qter | deletion |       |        |                                                                                                                                                         |                                                                                                                               |
|  |             |          | LIG4  | 601837 | The protein encoded by this gene is a DNA ligase that joins single-strand breaks in a double-stranded polydeoxynucleotide in an ATP-dependent reaction. | LIG4 syndrome<br>Severe combined immunodeficiency with sensitivity to ionizing radiation<br>{Multiple myeloma, resistance to} |

|  |  |  |          |        |                                                                                                                                                                                                                                                                               |                                                                                                                                                                                            |
|--|--|--|----------|--------|-------------------------------------------------------------------------------------------------------------------------------------------------------------------------------------------------------------------------------------------------------------------------------|--------------------------------------------------------------------------------------------------------------------------------------------------------------------------------------------|
|  |  |  | TNFSF13B | 603969 | The protein encoded by this gene is a cytokine that belongs to the tumor necrosis factor (TNF) ligand family.                                                                                                                                                                 |                                                                                                                                                                                            |
|  |  |  | IRS2     | 600797 | This gene encodes the insulin receptor substrate 2, a cytoplasmic signaling molecule that mediates effects of insulin, insulin-like growth factor 1, and other cytokines by acting as a molecular adaptor between diverse receptor tyrosine kinases and downstream effectors. | {Diabetes mellitus, noninsulin-dependent}                                                                                                                                                  |
|  |  |  | COL4A1   | 120130 | This gene encodes the major type IV alpha collagen chain of basement membranes.                                                                                                                                                                                               | Angiopathy, hereditary, with nephropathy, aneurysms, and muscle<br>Brain small vessel disease with Axenfeld-Rieger anomaly<br>Brain small vessel disease with hemorrhage<br>Porencephaly 1 |
|  |  |  | COL4A2   | 120090 | This gene encodes one of the six                                                                                                                                                                                                                                              | 13q34 Porencephaly 2                                                                                                                                                                       |

|  |  |  |         |        |                                                                                                                                                                                                       |                                                 |
|--|--|--|---------|--------|-------------------------------------------------------------------------------------------------------------------------------------------------------------------------------------------------------|-------------------------------------------------|
|  |  |  |         |        | subunits of type IV collagen, the major structural component of basement membranes.                                                                                                                   | {Stroke, hemorrhagic}                           |
|  |  |  | CARS2   | 612800 | cysteinyl-tRNA synthetase 2, mitochondrial (putative)                                                                                                                                                 |                                                 |
|  |  |  | ING1    | 601566 | This gene encodes a tumor suppressor protein that can induce cell growth arrest and apoptosis.                                                                                                        | Squamous cell carcinoma, head and neck, somatic |
|  |  |  | ARHGEF7 | 605477 | The encoded protein belongs to a family of cytoplasmic proteins that activate the Ras-like family of Rho proteins by exchanging bound GDP for GTP.                                                    |                                                 |
|  |  |  | SOX1    | 602148 | This intronless gene encodes a member of the SOX (SRY-related HMG-box) family of transcription factors involved in the regulation of embryonic development and in the determination of the cell fate. |                                                 |
|  |  |  | ATP11A  | 605868 | The protein encoded by this gene is an integral membrane ATPase.                                                                                                                                      |                                                 |

|           |                |                 |         |        |                                                                                                                           |                                                                                  |
|-----------|----------------|-----------------|---------|--------|---------------------------------------------------------------------------------------------------------------------------|----------------------------------------------------------------------------------|
|           |                |                 | MCF2L   | 609499 | MCF.2 cell line derived transforming sequence-like                                                                        |                                                                                  |
|           |                |                 | F7      | 613878 | This gene encodes coagulation factor VII which is a vitamin K-dependent factor essential for hemostasis.                  | Factor VII deficiency<br>{Myocardial infarction,<br>decreased susceptibility to} |
|           |                |                 | F10     | 613872 | This gene encodes the vitamin K-dependent coagulation factor X of the blood coagulation cascade.                          | Factor X deficiency                                                              |
|           |                |                 | PROZ    | 176895 | This gene encodes a liver vitamin K-dependent glycoprotein that is synthesized in the liver and secreted into the plasma. | [Protein Z deficiency]                                                           |
|           |                |                 | PCID2   | 613713 | PCI domain containing 2                                                                                                   |                                                                                  |
|           |                |                 | CUL4A   | 603137 | cullin 4A                                                                                                                 |                                                                                  |
|           |                |                 | LAMP1   | 153330 | The protein encoded by this gene is a member of a family of membrane glycoproteins.                                       |                                                                                  |
|           |                |                 | ADPRHL1 | 610620 | ADP-ribosylhydrolase like 1                                                                                               |                                                                                  |
| <b>17</b> | <b>13q32.2</b> | <b>deletion</b> |         |        |                                                                                                                           |                                                                                  |
|           |                |                 | IPO5    | 602008 | The protein encoded by this gene is a member of the importin beta family.                                                 |                                                                                  |

|  | 16p13.3 | duplication |         |        |                                                                                                                                                                              |                                         |
|--|---------|-------------|---------|--------|------------------------------------------------------------------------------------------------------------------------------------------------------------------------------|-----------------------------------------|
|  |         |             | PKD1    | 601313 | This gene encodes a member of the polycystin protein family.                                                                                                                 | Polycystic kidney disease, adult type I |
|  |         |             | RAB26   | 605455 | Members of the RAB protein family, including RAB26, are important regulators of vesicular fusion and trafficking.                                                            |                                         |
|  |         |             | TRAF7   | 606692 | Tumor necrosis factor (TNF; see MIM 191160) receptor-associated factors, such as TRAF7, are signal transducers for members of the TNF receptor superfamily (see MIM 191190). |                                         |
|  |         |             | CASKIN1 | 612184 | CASK interacting protein 1                                                                                                                                                   |                                         |
|  |         |             | MLST8   | 612190 | MTOR associated protein, LST8 homolog ( <i>S. cerevisiae</i> )                                                                                                               |                                         |
|  |         |             | PGP     | 172280 | phosphoglycolate phosphatase                                                                                                                                                 |                                         |
|  |         |             | E4F1    | 603022 | The zinc finger protein encoded by this gene is one of several cellular transcription factors whose DNA-binding activities are regulated                                     |                                         |

|           |                |                    |          |        |                                                                                                                                                                             |                                                 |
|-----------|----------------|--------------------|----------|--------|-----------------------------------------------------------------------------------------------------------------------------------------------------------------------------|-------------------------------------------------|
|           |                |                    |          |        | through the action of adenovirus E1A.                                                                                                                                       |                                                 |
|           |                |                    | DNASE1L2 | 602622 | deoxyribonuclease I-like 2                                                                                                                                                  |                                                 |
|           |                |                    | DCI      | 600305 | This gene encodes a member of the hydratase/isomerase superfamily. The protein encoded is a key mitochondrial enzyme involved in beta-oxidation of unsaturated fatty acids. |                                                 |
|           |                |                    | RNPS1    | 606447 | This gene encodes a protein that is part of a post-splicing multiprotein complex involved in both mRNA nuclear export and mRNA surveillance.                                |                                                 |
|           |                |                    | ABCA3    | 601615 | The membrane-associated protein encoded by this gene is a member of the superfamily of ATP-binding cassette (ABC) transporters.                                             | Surfactant metabolism dysfunction, pulmonary, 3 |
| <b>18</b> | <b>19p13.3</b> | <b>duplication</b> |          |        |                                                                                                                                                                             |                                                 |
|           |                |                    | THEG     | 609503 | theg spermatid protein                                                                                                                                                      |                                                 |
|           |                |                    | C2CD4C   | 610336 | C2 calcium-dependent domain containing 4C                                                                                                                                   |                                                 |

|  |  |  |         |        |                                                                                                                                                                                                                                                                              |  |
|--|--|--|---------|--------|------------------------------------------------------------------------------------------------------------------------------------------------------------------------------------------------------------------------------------------------------------------------------|--|
|  |  |  | SHC2    | 605217 | SHC (Src homology 2 domain containing) transforming protein 2                                                                                                                                                                                                                |  |
|  |  |  | MADCAM1 | 102670 | The protein encoded by this gene is an endothelial cell adhesion molecule that interacts preferentially with the leukocyte beta7 integrin LPAM-1 (alpha4beta7), L-selectin, and VLA-4 (alpha4beta1) on myeloid cells to direct leukocytes into mucosal and inflamed tissues. |  |
|  |  |  | CDC34   | 116948 | The protein encoded by this gene is a member of the ubiquitin-conjugating enzyme family. Ubiquitin-conjugating enzyme catalyzes the covalent attachment of ubiquitin to other proteins.                                                                                      |  |
|  |  |  | GZMM    | 600311 | Human natural killer (NK) cells and activated lymphocytes express and store a distinct subset of neutral serine proteases together with proteoglycans and other immune                                                                                                       |  |



|  |  |  |        |        |                                                                                                                                                                           |                   |
|--|--|--|--------|--------|---------------------------------------------------------------------------------------------------------------------------------------------------------------------------|-------------------|
|  |  |  |        |        | effector molecules in large cytoplasmic granules.                                                                                                                         |                   |
|  |  |  | BSG    | 109480 | The protein encoded by this gene is a plasma membrane protein that is important in spermatogenesis, embryo implantation, neural network formation, and tumor progression. | [Blood group, OK] |
|  |  |  | HCN2   | 602781 | hyperpolarization activated cyclic nucleotide-gated potassium channel 2                                                                                                   |                   |
|  |  |  | POLRMT | 601778 | This gene encodes a mitochondrial DNA-directed RNA polymerase.                                                                                                            |                   |
|  |  |  | FGF22  | 605831 | The protein encoded by this gene is a member of the fibroblast growth factor (FGF) family.                                                                                |                   |
|  |  |  | FSTL3  | 605343 | folliculin-like 3 (secreted glycoprotein)                                                                                                                                 |                   |
|  |  |  | PALM   | 608134 | This gene encodes a member of the paralemmin protein family.                                                                                                              |                   |
|  |  |  | PTBP1  | 600693 | This gene belongs to the subfamily of ubiquitously expressed                                                                                                              |                   |

|  |  |  |       |        |                                                                                                                                                                                                                                                                                                     |                                |
|--|--|--|-------|--------|-----------------------------------------------------------------------------------------------------------------------------------------------------------------------------------------------------------------------------------------------------------------------------------------------------|--------------------------------|
|  |  |  |       |        | heterogeneous nuclear ribonucleoproteins (hnRNPs).                                                                                                                                                                                                                                                  |                                |
|  |  |  | LPPR3 | 610391 | The proteins in the lipid phosphate phosphatase (LPP) family, including PRG2, are integral membrane proteins that modulate bioactive lipid phosphates including phosphatidate, lysophosphatidate, and sphingosine-1-phosphate in the context of cell migration, neurite retraction, and mitogenesis |                                |
|  |  |  | AZU1  | 162815 | The protein encoded by this gene is an azurophil granule antibiotic protein, with monocyte chemotactic and antibacterial activity. It is also an important multifunctional inflammatory mediator.                                                                                                   |                                |
|  |  |  | PRTN3 | 177020 | proteinase 3                                                                                                                                                                                                                                                                                        |                                |
|  |  |  | ELANE | 134350 | Elastases form a subfamily of serine proteases that hydrolyze many proteins in addition to elastin.                                                                                                                                                                                                 | Complement factor D deficiency |

|  |  |  |        |        |                                                                                                                                                                                                                                 |                                                              |
|--|--|--|--------|--------|---------------------------------------------------------------------------------------------------------------------------------------------------------------------------------------------------------------------------------|--------------------------------------------------------------|
|  |  |  | CFD    | 604161 | The protein encoded by this gene is a member of the trypsin family of peptidases. The encoded protein is a component of the alternative complement pathway best known for its role in humoral suppression of infectious agents. | Hypogonadotropic hypogonadism<br>Precocious puberty, central |
|  |  |  | KISS1R | 604161 | The protein encoded by this gene is a galanin-like G protein-coupled receptor that binds metastin, a peptide encoded by the metastasis suppressor gene KISS1.                                                                   |                                                              |
|  |  |  | ARID3A | 603265 | This gene encodes a member of the ARID (AT-rich interaction domain) family of DNA binding proteins.                                                                                                                             |                                                              |
|  |  |  | GAMT   | 601240 | The protein encoded by this gene is a methyltransferase that converts guanidoacetate to creatine, using S-adenosylmethionine as the methyl donor.                                                                               |                                                              |
|  |  |  | DAZAP1 | 607430 | This gene encodes a RNA-binding                                                                                                                                                                                                 | GAMT deficiency                                              |

|  |  |  |        |                                                                                                                         |                                                                                                                                                                                                                                                   |
|--|--|--|--------|-------------------------------------------------------------------------------------------------------------------------|---------------------------------------------------------------------------------------------------------------------------------------------------------------------------------------------------------------------------------------------------|
|  |  |  |        | protein with two RNP motifs that was originally identified by its interaction with the infertility factors DAZ and DAZL |                                                                                                                                                                                                                                                   |
|  |  |  | RPS15  | 180535                                                                                                                  | This gene encodes a ribosomal protein that is a component of the 40S subunit.                                                                                                                                                                     |
|  |  |  | APC2   | 612034                                                                                                                  | adenomatosis polyposis coli 2                                                                                                                                                                                                                     |
|  |  |  | PCSK4  | 600487                                                                                                                  | This gene encodes a member of the subtilisin-like proprotein convertase family.                                                                                                                                                                   |
|  |  |  | REEP6  | 609346                                                                                                                  | receptor accessory protein 6                                                                                                                                                                                                                      |
|  |  |  | MEX3D  | 611009                                                                                                                  | mex-3 homolog D ( <i>C. elegans</i> )                                                                                                                                                                                                             |
|  |  |  | MBD3   | 603573                                                                                                                  | methyl-CpG binding domain protein 3                                                                                                                                                                                                               |
|  |  |  | UQCR11 | 609711                                                                                                                  | This gene encodes the smallest known component of the ubiquinol-cytochrome c reductase complex, which forms part of the mitochondrial respiratory chain. The encoded protein may function as a binding factor for the iron-sulfur protein in this |

|  |  |  |         |        |                                                                                                                                                                       |                               |
|--|--|--|---------|--------|-----------------------------------------------------------------------------------------------------------------------------------------------------------------------|-------------------------------|
|  |  |  |         |        | complex.                                                                                                                                                              |                               |
|  |  |  | TCF3    | 147141 | This gene encodes a member of the E protein (class I) family of helix-loop-helix transcription factors.                                                               | Leukemia, acute lymphoblastic |
|  |  |  | ONECUT3 | 611294 | one cut homeobox 3                                                                                                                                                    |                               |
|  |  |  | ATP8B3  | 605866 | The protein encoded by this gene belongs to the family of P-type cation transport ATPases, and to the subfamily of aminophospholipid-transporting ATPases.            |                               |
|  |  |  | REXO1   | 609614 | REX1, RNA exonuclease 1 homolog ( <i>S. cerevisiae</i> )                                                                                                              |                               |
|  |  |  | KLF16   | 606139 | Kruppel-like factor 16                                                                                                                                                |                               |
|  |  |  | SCAMP4  | 613764 | secretory carrier membrane protein 4                                                                                                                                  |                               |
|  |  |  | CSNK1G2 | 602214 | casein kinase 1, gamma 2                                                                                                                                              |                               |
|  |  |  | BTBD2   | 608531 | BTB (POZ) domain containing 2                                                                                                                                         |                               |
|  |  |  | MKNK2   | 605069 | This gene encodes a member of the calcium/calmodulin-dependent protein kinases (CAMK) Ser/Thr protein kinase family, which belongs to the protein kinase superfamily. |                               |

|  |  |  |       |        |                                                                                                                                                                                                  |                                            |
|--|--|--|-------|--------|--------------------------------------------------------------------------------------------------------------------------------------------------------------------------------------------------|--------------------------------------------|
|  |  |  | AP3D1 | 607246 | The protein encoded by this gene is a subunit of the AP3 adaptor-like complex, which is not clathrin-associated, but is associated with the golgi region, as well as more peripheral structures. |                                            |
|  |  |  | DOT1L | 607375 | The protein encoded by this gene is a histone methyltransferase that methylates lysine-79 of histone H3.                                                                                         |                                            |
|  |  |  | SF3A2 | 600796 | This gene encodes subunit 2 of the splicing factor 3a protein complex.                                                                                                                           |                                            |
|  |  |  | AMH   | 600957 | Anti-Mullerian hormone is a member of the transforming growth factor-beta gene family which mediates male sexual differentiation.                                                                | Persistent Mullerian duct syndrome, type I |
|  |  |  | JSRP1 | 608743 | he sarcoplasmic reticulum (SR) is an intracellular membrane compartment that controls intracellular calcium concentration and therefore plays a role in excitation-contraction coupling.         |                                            |
|  |  |  | OAZ1  | 601579 | The antizyme encoded by this gene                                                                                                                                                                |                                            |

|  |  |  |         |        |                                                                                                                                                                                                          |                                                       |
|--|--|--|---------|--------|----------------------------------------------------------------------------------------------------------------------------------------------------------------------------------------------------------|-------------------------------------------------------|
|  |  |  |         |        | inhibits ornithine decarboxylase and accelerates its degradation.                                                                                                                                        |                                                       |
|  |  |  | LINGO3  | 609792 | leucine rich repeat and Ig domain containing 3                                                                                                                                                           |                                                       |
|  |  |  | LSM7    | 607287 | LSM7 homolog, U6 small nuclear RNA associated ( <i>S. cerevisiae</i> )                                                                                                                                   |                                                       |
|  |  |  | SPPL2B  | 608239 | This gene encodes a member of the GXGD family of aspartic proteases.                                                                                                                                     |                                                       |
|  |  |  | TMPRSS9 | 610477 | transmembrane protease, serine 9                                                                                                                                                                         |                                                       |
|  |  |  | TIMM13  | 607383 | This gene encodes a translocase with similarity to yeast mitochondrial proteins that are involved in the import of metabolite transporters from the cytoplasm and into the mitochondrial inner membrane. |                                                       |
|  |  |  | LMNB2   | 150341 | The nuclear lamina consists of a two-dimensional matrix of proteins located next to the inner nuclear membrane.                                                                                          | {Lipodystrophy, partial, acquired, susceptibility to} |
|  |  |  | GADD45B | 604948 | This gene is a member of a group of genes whose transcript levels are increased following stressful growth                                                                                               |                                                       |

|  |  |  |         |                                                                                                                                                                     |                                                                                                                                                                                               |
|--|--|--|---------|---------------------------------------------------------------------------------------------------------------------------------------------------------------------|-----------------------------------------------------------------------------------------------------------------------------------------------------------------------------------------------|
|  |  |  |         | arrest conditions and treatment with DNA-damaging agents. The genes in this group respond to environmental stresses by mediating activation of the p38/JNK pathway. |                                                                                                                                                                                               |
|  |  |  | GNG7    | 604430                                                                                                                                                              | guanine nucleotide binding protein (G protein), gamma 7                                                                                                                                       |
|  |  |  | DIRAS1  | 607862                                                                                                                                                              | DIRAS family, GTP-binding RAS-like 1                                                                                                                                                          |
|  |  |  | SLC39A3 | 612168                                                                                                                                                              | solute carrier family 39 (zinc transporter), member 3                                                                                                                                         |
|  |  |  | SGTA    | 603419                                                                                                                                                              | This gene encodes a protein which is capable of interacting with the major nonstructural protein of parvovirus H-1 and 70-kDa heat shock cognate protein; however, its function is not known. |
|  |  |  | THOP1   | 601117                                                                                                                                                              | thimet oligopeptidase 1                                                                                                                                                                       |
|  |  |  | ZNF77   | 194551                                                                                                                                                              | zinc finger protein 77                                                                                                                                                                        |
|  |  |  | TLE6    | 612399                                                                                                                                                              | transducin-like enhancer of split 6 (E(sp1) homolog, Drosophila)                                                                                                                              |



|  |  |  |       |        |                                                                                                                                                                                                                                                 |  |
|--|--|--|-------|--------|-------------------------------------------------------------------------------------------------------------------------------------------------------------------------------------------------------------------------------------------------|--|
|  |  |  | TLE2  | 601041 | transducin-like enhancer of split 2 (E(sp1) homolog, Drosophila)                                                                                                                                                                                |  |
|  |  |  | AES   | 600188 | The encoded protein, which belongs to the groucho/TLE family of proteins, can function as a homooligomer or as a heterooligomer with other family members to dominantly repress the expression of other family member genes.                    |  |
|  |  |  | GNA11 | 139313 | guanine nucleotide binding protein (G protein), alpha 11 (Gq class)                                                                                                                                                                             |  |
|  |  |  | GNA15 | 139314 | guanine nucleotide binding protein (G protein), alpha 15 (Gq class)                                                                                                                                                                             |  |
|  |  |  | S1PR4 | 603751 | This gene is a member of the endothelial differentiation, G-protein-coupled (EDG) receptor gene family. EDG receptors bind lysophospholipids or lysosphingolipids as ligands, and are involved in cell signalling in many different cell types. |  |

|  |  |  |        |        |                                                                                                                                                                                                                                                |                                  |
|--|--|--|--------|--------|------------------------------------------------------------------------------------------------------------------------------------------------------------------------------------------------------------------------------------------------|----------------------------------|
|  |  |  | NCLN   | 609156 | nicalin                                                                                                                                                                                                                                        |                                  |
|  |  |  | CELF5  | 612680 | This gene encodes a member of the the CELF/BRUNOL protein family, which contain two N-terminal RNA recognition motif (RRM) domains, one C-terminal RRM domain, and a divergent segment of 160-230 aa between the second and third RRM domains. |                                  |
|  |  |  | NFIC   | 600729 | The protein encoded by this gene belongs to the CTF/NF-I family.                                                                                                                                                                               |                                  |
|  |  |  | DOHH   | 611262 | This gene encodes a metalloenzyme that catalyzes the last step in the conversion of lysine to the unique amino acid hypusine in eukaryotic initiation factor 5A.                                                                               |                                  |
|  |  |  | FZR1   | 603619 | fizzy/cell division cycle 20 related 1 (Drosophila)                                                                                                                                                                                            |                                  |
|  |  |  | HMG20B | 605535 | high mobility group 20B                                                                                                                                                                                                                        |                                  |
|  |  |  | GIPC3  | 608792 | The protein encoded by this gene belongs to the GIPC family.                                                                                                                                                                                   | Deafness, autosomal recessive 15 |

|  |  |  |         |        |                                                                                                                                                                                                                                     |                                                               |
|--|--|--|---------|--------|-------------------------------------------------------------------------------------------------------------------------------------------------------------------------------------------------------------------------------------|---------------------------------------------------------------|
|  |  |  | TBXA2R  | 188070 | This gene encodes a member of the G protein-coupled receptor family.                                                                                                                                                                | {Bleeding disorder, platelet-type, 13, susceptibility to}     |
|  |  |  | PIP5K1C | 606102 | This locus encodes a type I phosphatidylinositol 4-phosphate 5-kinase.                                                                                                                                                              | Lethal congenital contractural syndrome 3                     |
|  |  |  | TJP3    | 612689 | tight junction protein 3 (zona occludens 3)                                                                                                                                                                                         |                                                               |
|  |  |  | APBA3   | 604262 | The protein encoded by this gene is a member of the X11 protein family                                                                                                                                                              |                                                               |
|  |  |  | MRPL54  | 611858 | This gene encodes a 39S subunit protein.                                                                                                                                                                                            |                                                               |
|  |  |  | RAX2    | 610362 | This gene encodes a homeodomain-containing protein that plays a role in eye development.                                                                                                                                            | Cone-rod dystrophy 11<br>Macular degeneration, age-related, 6 |
|  |  |  | MATK    | 600038 | The protein encoded by this gene has amino acid sequence similarity to Csk tyrosine kinase and has the structural features of the CSK subfamily: SRC homology SH2 and SH3 domains, a catalytic domain, a unique N terminus, lack of |                                                               |

|  |  |  |          |                                                                                                                                                                                                                           |                                                                                                                                        |                                 |
|--|--|--|----------|---------------------------------------------------------------------------------------------------------------------------------------------------------------------------------------------------------------------------|----------------------------------------------------------------------------------------------------------------------------------------|---------------------------------|
|  |  |  |          | myristylation signals, lack of a negative regulatory phosphorylation site, and lack of an autophosphorylation site. This protein is thought to play a significant role in the signal transduction of hematopoietic cells. |                                                                                                                                        |                                 |
|  |  |  | ATCAY    | 608179                                                                                                                                                                                                                    | This gene encodes a neuron-restricted protein that contains a CRAL-TRIO motif common to proteins that bind small lipophilic molecules. | Ataxia, cerebellar, Cayman type |
|  |  |  | ITGB1BP3 | 608705                                                                                                                                                                                                                    | integrin beta 1 binding protein 3                                                                                                      |                                 |
|  |  |  | DAPK3    | 603289                                                                                                                                                                                                                    | Death-associated protein kinase 3 (DAPK3) induces morphological changes in apoptosis when overexpressed in mammalian cells.            |                                 |
|  |  |  | EEF2     | 130610                                                                                                                                                                                                                    | This gene encodes a member of the GTP-binding translation elongation factor family.                                                    |                                 |
|  |  |  | PIAS4    | 605989                                                                                                                                                                                                                    | protein inhibitor of activated STAT, 4                                                                                                 |                                 |

|  |  |         |        |                                                                                                                              |                               |
|--|--|---------|--------|------------------------------------------------------------------------------------------------------------------------------|-------------------------------|
|  |  | ZBTB7A  | 605878 | zinc finger and BTB domain containing 7A                                                                                     |                               |
|  |  | MAP2K2  | 601263 | The protein encoded by this gene is a dual specificity protein kinase that belongs to the MAP kinase kinase family.          | Cardiofaciocutaneous syndrome |
|  |  | CREB3L3 | 611998 | cAMP responsive element binding protein 3-like 3                                                                             |                               |
|  |  | SIRT6   | 606211 | This gene encodes a member of the sirtuin family of proteins, homologs to the yeast Sir2 protein.                            |                               |
|  |  | EBI3    | 605816 | This gene was identified by its induced expression in B lymphocytes in response Epstein-Barr virus infection.                |                               |
|  |  | SHD     | 610481 | Src homology 2 domain containing transforming protein D                                                                      |                               |
|  |  | FSD1    | 609828 | This gene encodes a centrosome associated protein that is characterized by an N-terminal coiled-coil region downstream of B- |                               |

|  |  |  |        |        |                                                                                                                                                                                          |                         |
|--|--|--|--------|--------|------------------------------------------------------------------------------------------------------------------------------------------------------------------------------------------|-------------------------|
|  |  |  |        |        | box (BBC) domain, a central fibronectin type III domain, and a C-terminal repeats in splA and RyR (SPRY) domain.                                                                         |                         |
|  |  |  | STAP2  | 607881 | This gene encodes the substrate of breast tumor kinase, an Src-type non-receptor tyrosine kinase.                                                                                        |                         |
|  |  |  | SH3GL1 | 601768 | This gene encodes a member of the endophilin family of Src homology 3 domain-containing proteins.                                                                                        | Leukemia, acute myeloid |
|  |  |  | CHAF1A | 601246 | chromatin assembly factor 1, subunit A (p150)                                                                                                                                            |                         |
|  |  |  | UBXN6  | 611946 | UBX domain protein 6                                                                                                                                                                     |                         |
|  |  |  | PLIN4  | 613247 | perilipin 4                                                                                                                                                                              |                         |
|  |  |  | PLIN5  | 613248 | perilipin 5                                                                                                                                                                              |                         |
|  |  |  | LRG1   | 611289 | The leucine-rich repeat (LRR) family of proteins, including LRG1, have been shown to be involved in protein-protein interaction, signal transduction, and cell adhesion and development. |                         |

|  |  |  |          |        |                                                                                                                                                                                                                                                           |  |
|--|--|--|----------|--------|-----------------------------------------------------------------------------------------------------------------------------------------------------------------------------------------------------------------------------------------------------------|--|
|  |  |  | SEMA6B   | 608873 | This gene encodes a member of the semaphorin family, a group of proteins characterized by the presence of a conserved semaphorin (sema) domain.                                                                                                           |  |
|  |  |  | C19orf10 | 606746 | The protein encoded by this gene was previously thought to support proliferation of lymphoid cells and was considered an interleukin.                                                                                                                     |  |
|  |  |  | DPP9     | 608258 | This gene encodes a protein that is a member of the S9B family in clan SC of the serine proteases.                                                                                                                                                        |  |
|  |  |  | FEM1A    | 613538 | fem-1 homolog a ( <i>C. elegans</i> )                                                                                                                                                                                                                     |  |
|  |  |  | TICAM1   | 607601 | This gene encodes an adaptor protein containing a Toll/interleukin-1 receptor (TIR) homology domain, which is an intracellular signaling domain that mediates protein-protein interactions between the Toll-like receptors (TLRs) and signal-transduction |  |

|           |               |                    |         |        |                                                                                                                                                                                                                                                                                                                   |                                                                                           |
|-----------|---------------|--------------------|---------|--------|-------------------------------------------------------------------------------------------------------------------------------------------------------------------------------------------------------------------------------------------------------------------------------------------------------------------|-------------------------------------------------------------------------------------------|
|           |               |                    |         |        | components.                                                                                                                                                                                                                                                                                                       |                                                                                           |
|           |               |                    | PLIN3   | 602702 | Mannose 6-phosphate receptors (MPRs) deliver lysosomal hydrolase from the Golgi to endosomes and then return to the Golgi complex. The protein encoded by this gene interacts with the cytoplasmic domains of both cation-independent and cation-dependent MPRs, and is required for endosome-to-Golgi transport. |                                                                                           |
|           |               |                    | UHRF1   | 607990 | This gene encodes a member of a subfamily of RING-finger type E3 ubiquitin ligases.                                                                                                                                                                                                                               |                                                                                           |
|           |               |                    | KDM4B   | 609765 | lysine (K)-specific demethylase 4B                                                                                                                                                                                                                                                                                |                                                                                           |
| <b>19</b> | <b>5q35.3</b> | <b>duplication</b> |         |        |                                                                                                                                                                                                                                                                                                                   |                                                                                           |
|           |               |                    | SLC34A1 | 182309 | This gene encodes a member of the type II sodium-phosphate cotransporter family.                                                                                                                                                                                                                                  | Fanconi renal tubular syndrome 2<br>Nephrolithiasis/osteoporosis<br>, hypophosphatemic, 1 |



|  |  |  |        |        |                                                                                                                                                          |                                                           |
|--|--|--|--------|--------|----------------------------------------------------------------------------------------------------------------------------------------------------------|-----------------------------------------------------------|
|  |  |  | PFN3   | 612812 | The product of this gene belongs to the profilin family of proteins. This protein binds to actin and affects the structure of the cytoskeleton.          |                                                           |
|  |  |  | F12    | 610619 | This gene encodes coagulation factor XII which circulates in blood as a zymogen.                                                                         | Angioedema, hereditary, type III<br>Factor XII deficiency |
|  |  |  | GRK6   | 600869 | This gene encodes a member of the guanine nucleotide-binding protein (G protein)-coupled receptor kinase subfamily of the Ser/Thr protein kinase family. |                                                           |
|  |  |  | DBN1   | 126660 | The protein encoded by this gene is a cytoplasmic actin-binding protein thought to play a role in the process of neuronal growth.                        |                                                           |
|  |  |  | PDLIM7 | 605903 | The protein encoded by this gene is representative of a family of proteins composed of conserved PDZ and LIM domains.                                    |                                                           |
|  |  |  | DOK3   | 611435 | docking protein 3                                                                                                                                        |                                                           |

|  |          |             |        |        |                                                                                                                                                                                                                                                                                                                                      |                     |
|--|----------|-------------|--------|--------|--------------------------------------------------------------------------------------------------------------------------------------------------------------------------------------------------------------------------------------------------------------------------------------------------------------------------------------|---------------------|
|  |          |             | DDX41  | 608170 | <p>DEAD box proteins, characterized by the conserved motif Asp-Glu-Ala-Asp (DEAD), are putative RNA helicases. They are implicated in a number of cellular processes involving alteration of RNA secondary structure, such as translation initiation, nuclear and mitochondrial splicing, and ribosome and spliceosome assembly.</p> |                     |
|  | 12q24.11 | duplication |        |        |                                                                                                                                                                                                                                                                                                                                      |                     |
|  |          |             | PPTC7  | 609668 | PTC7 protein phosphatase homolog ( <i>S. cerevisiae</i> )                                                                                                                                                                                                                                                                            |                     |
|  |          |             | TCTN1  | 609863 | This gene encodes a member of the tectonic family of secreted and transmembrane proteins.                                                                                                                                                                                                                                            | Joubert syndrome 13 |
|  |          |             | HVCN1  | 611227 | This gene encodes a voltage-gated protein channel protein expressed more highly in certain cells of the immune system.                                                                                                                                                                                                               |                     |
|  |          |             | PPP1CC | 176914 | The protein encoded by this gene belongs to the protein phosphatase                                                                                                                                                                                                                                                                  |                     |

|           |                     |                 |       |        |                                                                                                                                                                                                                                                                            |  |
|-----------|---------------------|-----------------|-------|--------|----------------------------------------------------------------------------------------------------------------------------------------------------------------------------------------------------------------------------------------------------------------------------|--|
|           |                     |                 |       |        | family, PP1 subfamily. PP1 is an ubiquitous serine/threonine phosphatase that regulates many cellular processes, including cell division.                                                                                                                                  |  |
|           | 16q12.1             | deletion        |       |        |                                                                                                                                                                                                                                                                            |  |
|           |                     |                 | ITFG1 | 611803 | integrin alpha FG-GAP repeat containing 1                                                                                                                                                                                                                                  |  |
| <b>20</b> | <b>10q26.2q26.3</b> | <b>deletion</b> |       |        |                                                                                                                                                                                                                                                                            |  |
|           |                     |                 | DOCK1 | 601403 | This gene product binds to the SH3 domain of CRK protein.                                                                                                                                                                                                                  |  |
|           |                     |                 | NPS   | 609513 | neuropeptide S                                                                                                                                                                                                                                                             |  |
|           |                     |                 | PTPRE | 600926 | The protein encoded by this gene is a member of the protein tyrosine phosphatase (PTP) family. PTPs are known to be signaling molecules that regulate a variety of cellular processes including cell growth, differentiation, mitotic cycle, and oncogenic transformation. |  |

|  |  |  |         |        |                                                                                                                                                                                           |  |
|--|--|--|---------|--------|-------------------------------------------------------------------------------------------------------------------------------------------------------------------------------------------|--|
|  |  |  | MKI67   | 176741 | This gene encodes a nuclear protein that is associated with and may be necessary for cellular proliferation.                                                                              |  |
|  |  |  | MGMT    | 156569 | O-6-methylguanine-DNA methyltransferase                                                                                                                                                   |  |
|  |  |  | EBF3    | 607407 | This gene encodes a member of the early B-cell factor (EBF) family of DNA binding transcription factors.                                                                                  |  |
|  |  |  | GLRX3   | 612754 | This gene encodes a member of the glutaredoxin family.                                                                                                                                    |  |
|  |  |  | PPP2R2D | 613992 | protein phosphatase 2, regulatory subunit B, delta                                                                                                                                        |  |
|  |  |  | BNIP3   | 603293 | This gene is a member of the BCL2/adenovirus E1B 19 kd-interacting protein (BNIP) family. It interacts with the E1B 19 kDa protein, which protects cells from virally-induced cell death. |  |
|  |  |  | JAKMIP3 | 611198 | Janus kinase and microtubule interacting protein 3                                                                                                                                        |  |
|  |  |  | DPYSL4  | 608407 | dihydropyrimidinase-like 4                                                                                                                                                                |  |

|           |               |                    |         |         |                                                                                                                                                                                                                                   |                                                                                                                  |
|-----------|---------------|--------------------|---------|---------|-----------------------------------------------------------------------------------------------------------------------------------------------------------------------------------------------------------------------------------|------------------------------------------------------------------------------------------------------------------|
|           | 17q12         | deletion           |         |         |                                                                                                                                                                                                                                   |                                                                                                                  |
|           |               |                    | TBC1D3C | 610806  | The proteins encoded by this gene family contain a TBC (Tre-2, Bub2p, and Cdc16p) domain, which is found in proteins involved in RAB GTPase signaling and vesicle trafficking.                                                    |                                                                                                                  |
|           |               |                    | CCL3L2  | 609467  | chemokine (C-C motif) ligand 3 pseudogene 1                                                                                                                                                                                       |                                                                                                                  |
|           |               |                    | CCL3L1  | 601 395 | This protein binds to several chemokine receptors including chemokine binding protein 2 and chemokine (C-C motif) receptor 5 (CCR5).                                                                                              | {HIV/AIDS, susceptibility to}                                                                                    |
| <b>21</b> | <b>5q13.2</b> | <b>duplication</b> |         |         |                                                                                                                                                                                                                                   |                                                                                                                  |
|           |               |                    | SMN1    | 600354  | The protein encoded by this gene localizes to both the cytoplasm and the nucleus.<br>Within the nucleus, the protein localizes to subnuclear bodies called gems which are found near coiled bodies containing high concentrations | Spinal muscular atrophy-1<br>Spinal muscular atrophy-2<br>Spinal muscular atrophy-3<br>Spinal muscular atrophy-4 |

|  |  |  |      |        |                                                                                                                                                                                                                                                                                                                                                                                                                                                                             |  |
|--|--|--|------|--------|-----------------------------------------------------------------------------------------------------------------------------------------------------------------------------------------------------------------------------------------------------------------------------------------------------------------------------------------------------------------------------------------------------------------------------------------------------------------------------|--|
|  |  |  |      |        | <p>of small ribonucleoproteins (snRNPs).</p> <p>This protein forms heteromeric complexes with proteins such as SIP1 and GEMIN4, and also interacts with several proteins known to be involved in the biogenesis of snRNPs, such as hnRNP U protein and the small nucleolar RNA binding protein.</p>                                                                                                                                                                         |  |
|  |  |  | NAIP | 600355 | <p>This copy of the gene is full length; additional copies with truncations and internal deletions are also present in this region of chromosome 5q13.</p> <p>It is thought that this gene is a modifier of spinal muscular atrophy caused by mutations in a neighboring gene, SMN1. The protein encoded by this gene contains regions of homology to two baculovirus inhibitor of apoptosis proteins, and it is able to suppress apoptosis induced by various signals.</p> |  |

|           |                |                    |        |        |                                                                                                                                                                             |                                                                                                                                                                             |
|-----------|----------------|--------------------|--------|--------|-----------------------------------------------------------------------------------------------------------------------------------------------------------------------------|-----------------------------------------------------------------------------------------------------------------------------------------------------------------------------|
|           |                |                    | GTF2H2 | 601748 | This gene encodes the 44 kDa subunit of RNA polymerase II transcription initiation factor IIH which is involved in basal transcription and nucleotide excision repair.      |                                                                                                                                                                             |
|           | Yq11.223       | duplication        |        |        |                                                                                                                                                                             |                                                                                                                                                                             |
|           |                |                    | DAZ3   | 400027 | This gene is a member of the DAZ gene family and is a candidate for the human Y-chromosomal azoospermia factor (AZF).                                                       |                                                                                                                                                                             |
| <b>22</b> | <b>1p36.33</b> | <b>duplication</b> |        |        |                                                                                                                                                                             |                                                                                                                                                                             |
|           |                |                    | GABRD  | 137163 | Gamma-aminobutyric acid (GABA) is the major inhibitory neurotransmitter in the mammalian brain where it acts at GABA-A receptors, which are ligand-gated chloride channels. | {Epilepsy, idiopathic generalized, 10}<br>{Epilepsy, juvenile myoclonic, susceptibility to}<br>{Generalized epilepsy with febrile seizures plus, type 5, susceptibility to} |
|           |                |                    | PRKCZ  | 176982 | Protein kinase C (PKC) zeta is a member of the PKC family of serine/threonine kinases which are                                                                             |                                                                                                                                                                             |

|  |        |             |         |        |                                                                                                                                                                                                                                    |  |
|--|--------|-------------|---------|--------|------------------------------------------------------------------------------------------------------------------------------------------------------------------------------------------------------------------------------------|--|
|  |        |             |         |        | involved in a variety of cellular processes such as proliferation, differentiation and secretion.                                                                                                                                  |  |
|  |        |             | SKI     | 164780 | This gene encodes the nuclear protooncogene protein homolog of avian sarcoma viral (v-ski) oncogene. It functions as a repressor of TGF-beta signaling, and may play a role in neural tube development and muscle differentiation. |  |
|  | 7p22.3 | duplication |         |        |                                                                                                                                                                                                                                    |  |
|  |        |             | GPER    | 601805 | This gene is a member of the G-protein coupled receptor 1 family and encodes a multi-pass membrane protein that localizes to the endoplasmic reticulum.                                                                            |  |
|  |        |             | ZFAND2A | 610699 | zinc finger, AN1-type domain 2A                                                                                                                                                                                                    |  |
|  |        |             | INTS1   | 611345 | INTS1 is a subunit of the Integrator complex, which associates with the C-terminal domain of RNA polymerase II large subunit                                                                                                       |  |



|  |         |             |           |        |                                                                                                                                                                        |                                               |
|--|---------|-------------|-----------|--------|------------------------------------------------------------------------------------------------------------------------------------------------------------------------|-----------------------------------------------|
|  |         |             |           |        | (POLR2A; MIM 180660) and mediates 3-prime end processing of small nuclear RNAs U1                                                                                      |                                               |
|  |         |             | MAFK      | 600197 | The developmentally regulated expression of the globin genes depends on upstream regulatory elements termed locus control regions (LCRs).                              |                                               |
|  |         |             | MAD1L1    | 602686 | MAD1L1 is a component of the mitotic spindle-assembly checkpoint that prevents the onset of anaphase until all chromosome are properly aligned at the metaphase plate. | Lymphoma, somatic<br>Prostate cancer, somatic |
|  | 16p13.3 | duplication |           |        |                                                                                                                                                                        |                                               |
|  |         |             | RAB11FIP3 | 608738 | Proteins of the large Rab GTPase family (see RAB1A; MIM 179508) have regulatory roles in the formation, targeting, and fusion of intracellular transport vesicles.     |                                               |
|  |         |             | SOLH      | 603267 | This gene is involved in the first step in glycosylphosphatidylinositol (GPI)-                                                                                         |                                               |

|  |  |  |         |        |                                                                                                                                                                                              |  |
|--|--|--|---------|--------|----------------------------------------------------------------------------------------------------------------------------------------------------------------------------------------------|--|
|  |  |  |         |        | anchor biosynthesis.                                                                                                                                                                         |  |
|  |  |  | PIGQ    | 605754 | This gene encodes a secreted multidomain protein consisting of a signal peptide, a WAP domain, a follistatin domain, an immunoglobulin domain, two tandem Kunitz domains, and an NTR domain. |  |
|  |  |  | WFIKKN1 | 608021 | This gene encodes a member of the Rho family of GTPases.                                                                                                                                     |  |
|  |  |  | RHOT2   | 613889 | rhomboid, veinlet-like 1 (Drosophila)                                                                                                                                                        |  |
|  |  |  | RHBDL1  | 603264 | STIP1 homology and U-box containing protein 1, E3 ubiquitin protein ligase                                                                                                                   |  |
|  |  |  | STUB1   | 607207 | STUB1, or CHIP, is a ubiquitin ligase/cochaperone that participates in protein quality control by targeting a broad range of chaperone protein substrates for degradation                    |  |
|  |  |  | FBXL16  | 609082 | F-box and leucine-rich repeat protein                                                                                                                                                        |  |

|  |  |  |        |        |                                                                                                                                                      |                             |
|--|--|--|--------|--------|------------------------------------------------------------------------------------------------------------------------------------------------------|-----------------------------|
|  |  |  | METRN  | 610998 | Meteorin regulates glial cell differentiation and promotes the formation of axonal networks during neurogenesis                                      |                             |
|  |  |  | NARFL  | 611118 | nuclear prelamin A recognition factor-like                                                                                                           |                             |
|  |  |  | MSLN   | 601051 | This gene encodes a precursor protein that is cleaved into two products, megakaryocyte potentiating factor and mesothelin.                           |                             |
|  |  |  | CTHF18 | 613201 | CTF18, chromosome transmission fidelity factor 18 homolog ( <i>S. cerevisiae</i> )                                                                   |                             |
|  |  |  | GNG13  | 607298 | GNG13 is a gamma subunit that is expressed in taste, retinal, and neuronal tissues and plays a key role in taste transduction                        |                             |
|  |  |  | LMF1   | 611761 | The protein encoded by this gene resides in the endoplasmic reticulum, and is involved in the maturation and transport of lipoprotein lipase through | Lipase deficiency, combined |

|  |         |             |         |        |                                                                                                                                                                                                                                                                                                                                  |                                    |
|--|---------|-------------|---------|--------|----------------------------------------------------------------------------------------------------------------------------------------------------------------------------------------------------------------------------------------------------------------------------------------------------------------------------------|------------------------------------|
|  |         |             |         |        | the secretory pathway.                                                                                                                                                                                                                                                                                                           |                                    |
|  |         |             | SOX8    | 605923 | This gene encodes a member of the SOX (SRY-related HMG-box) family of transcription factors involved in the regulation of embryonic development and in the determination of the cell fate.                                                                                                                                       |                                    |
|  |         |             | SSTR5   | 182455 | Somatostatin and its related peptide cortistatin exert multiple biological actions on normal and tumoral tissue targets by interacting with somatostatin receptors (SSTRs). The protein encoded by this gene is one of the SSTRs, which is a multi-pass membrane protein and belongs to the G-protein coupled receptor 1 family. | Somatostatin analog, resistance to |
|  |         |             | C1QTNF8 | 614147 | C1q and tumor necrosis factor related protein 8                                                                                                                                                                                                                                                                                  |                                    |
|  | 17p13.3 | duplication |         |        |                                                                                                                                                                                                                                                                                                                                  |                                    |
|  |         |             | NXN     | 612895 | nucleoredoxin                                                                                                                                                                                                                                                                                                                    |                                    |

|  |          |             |        |        |                                                                                                                                                    |  |
|--|----------|-------------|--------|--------|----------------------------------------------------------------------------------------------------------------------------------------------------|--|
|  |          |             | TIMM22 | 607251 | translocase of inner mitochondrial membrane 22 homolog (yeast)                                                                                     |  |
|  |          |             | ABR    | 600365 | The protein encoded by this gene contains a GTPase-activating protein domain, a domain found in members of the Rho family of GTP-binding proteins. |  |
|  | 20q13.33 | duplication |        |        |                                                                                                                                                    |  |
|  |          |             | OSBPL2 | 606731 | This gene encodes a member of the oxysterol-binding protein (OSBP) family, a group of intracellular lipid receptors.                               |  |
|  |          |             | ADRM1  | 610650 | The protein encoded by this gene is an integral plasma membrane protein which promotes cell adhesion.                                              |  |
|  |          |             | LAMA5  | 601033 | The protein encoded by this gene belongs to the alpha subfamily of laminin chains and is a major component of basement membranes.                  |  |
|  |          |             | RPS21  | 180477 | This gene encodes a ribosomal protein that is a component of the                                                                                   |  |

|  |  |  |          |        |                                                                                                                                                                                                                      |  |
|--|--|--|----------|--------|----------------------------------------------------------------------------------------------------------------------------------------------------------------------------------------------------------------------|--|
|  |  |  |          |        | 40S subunit.                                                                                                                                                                                                         |  |
|  |  |  | GATA5    | 611496 | The protein encoded by this gene is a transcription factor that contains two GATA-type zinc fingers.                                                                                                                 |  |
|  |  |  | MIR1-1   | 609326 | microRNAs (miRNAs) are short (20-24 nt) non-coding RNAs that are involved in post-transcriptional regulation of gene expression in multicellular organisms by affecting both the stability and translation of mRNAs. |  |
|  |  |  | MIR133A2 | 610255 | microRNAs (miRNAs) are short (20-24 nt) non-coding RNAs that are involved in post-transcriptional regulation of gene expression in multicellular organisms by affecting both the stability and translation of mRNAs. |  |
|  |  |  | SLCO4A1  | 612436 | solute carrier organic anion transporter family, member 4A1                                                                                                                                                          |  |

|  |  |  |          |        |                                                                                                                                                                                                                                                                                                                                                |  |
|--|--|--|----------|--------|------------------------------------------------------------------------------------------------------------------------------------------------------------------------------------------------------------------------------------------------------------------------------------------------------------------------------------------------|--|
|  |  |  | NTSR1    | 162651 | <p>Neurotensin receptor 1 belongs to the large superfamily of G-protein coupled receptors.</p> <p>NTSR1 mediates the multiple functions of neurotensin, such as hypotension, hyperglycemia, hypothermia, antinociception, and regulation of intestinal motility and secretion.</p>                                                             |  |
|  |  |  | C20orf20 | 611157 | chromosome 20 open reading frame 20                                                                                                                                                                                                                                                                                                            |  |
|  |  |  | OGFR     | 606459 | <p>The protein encoded by this gene is a receptor for opioid growth factor (OGF), also known as [Met(5)]-enkephalin.</p> <p>OGF is a negative regulator of cell proliferation and tissue organization in a variety of processes. The encoded unbound receptor for OGF has been localized to the outer nuclear envelope, where it binds OGF</p> |  |

|  |  |  |          |        |                                                                                                                         |                                                                                                                                     |
|--|--|--|----------|--------|-------------------------------------------------------------------------------------------------------------------------|-------------------------------------------------------------------------------------------------------------------------------------|
|  |  |  |          |        | and is translocated into the nucleus.                                                                                   |                                                                                                                                     |
|  |  |  | COL9A3   | 120270 | This gene encodes one of the three alpha chains of type IX collagen, the major collagen component of hyaline cartilage. | Epiphyseal dysplasia, multiple, 3<br>Epiphyseal dysplasia, multiple, with myopathy {Intervertebral disc disease, susceptibility to} |
|  |  |  | TCFL5    | 604745 | transcription factor-like 5 (basic helix-loop-helix)                                                                    |                                                                                                                                     |
|  |  |  | DIDO1    | 604140 | This gene is similar to the mouse gene and therefore is thought to be involved in apoptosis.                            |                                                                                                                                     |
|  |  |  | C20orf11 | 611625 | chromosome 20 open reading frame 11                                                                                     |                                                                                                                                     |
|  |  |  | SLC17A9  | 612107 | solute carrier family 17, member 9                                                                                      |                                                                                                                                     |
|  |  |  | BHLHE23  | 609331 | basic helix-loop-helix family, member e23                                                                               |                                                                                                                                     |
|  |  |  | HAR1B    | 610557 | highly accelerated region 1B (non-protein coding)                                                                       |                                                                                                                                     |
|  |  |  | HAR1A    | 610556 | highly accelerated region 1A (non-                                                                                      |                                                                                                                                     |



|  |  |  |         |        | protein coding)                                                                                                                                                                                             |                                                                                |
|--|--|--|---------|--------|-------------------------------------------------------------------------------------------------------------------------------------------------------------------------------------------------------------|--------------------------------------------------------------------------------|
|  |  |  | BIRC7   | 605737 | The protein encoded by this gene is a member of the family of inhibitor of apoptosis proteins (IAP) and contains a single copy of a baculovirus IAP repeat (BIR) as well as a RING-type zinc finger domain. |                                                                                |
|  |  |  | NKAIN4  | 612873 | Na <sup>+</sup> /K <sup>+</sup> transporting ATPase interacting 4                                                                                                                                           |                                                                                |
|  |  |  | ARFGAP1 | 608377 | The protein encoded by this gene is a GTPase-activating protein (GAP) which associates with the Golgi apparatus and which interacts with ADP-ribosylation factor 1 (ARF1).                                  |                                                                                |
|  |  |  | CHRNA4  | 118504 | This gene encodes a nicotinic acetylcholine receptor, which belongs to a superfamily of ligand-gated ion channels that play a role in fast signal transmission at synapses.                                 | Epilepsy, nocturnal frontal lobe, 1<br>{Nicotine addiction, susceptibility to} |
|  |  |  | KCNQ2   | 602235 | The M channel is a slowly activating and deactivating potassium channel                                                                                                                                     | Epileptic encephalopathy, early infantile, 7                                   |

|  |  |  |         |        |                                                                                                                                                                          |                                          |
|--|--|--|---------|--------|--------------------------------------------------------------------------------------------------------------------------------------------------------------------------|------------------------------------------|
|  |  |  |         |        | that plays a critical role in the regulation of neuronal excitability.                                                                                                   | Myokymia<br>Seizures, benign neonatal, 1 |
|  |  |  | EEF1A2  | 602959 | This gene encodes an isoform of the alpha subunit of the elongation factor-1 complex, which is responsible for the enzymatic delivery of aminoacyl tRNAs to the ribosome |                                          |
|  |  |  | PTK6    | 602004 | The protein encoded by this gene is a cytoplasmic nonreceptor protein kinase which may function as an intracellular signal transducer in epithelial tissues.             |                                          |
|  |  |  | PRIC285 | 611265 | The protein encoded by this gene is a nuclear transcriptional co-activator for peroxisome proliferator activated receptor alpha.                                         |                                          |
|  |  |  | GMEB2   | 607451 | glucocorticoid modulatory element binding protein 2                                                                                                                      |                                          |
|  |  |  | STMN3   | 608362 | The protein encoded by this gene belongs to the stathmin/oncoprotein 18 family of microtubule-destabilizing                                                              |                                          |

|  |  |  |          |        |                                                                                                                                                                                                                                                                                              |  |
|--|--|--|----------|--------|----------------------------------------------------------------------------------------------------------------------------------------------------------------------------------------------------------------------------------------------------------------------------------------------|--|
|  |  |  |          |        | phosphoproteins.                                                                                                                                                                                                                                                                             |  |
|  |  |  | RTEL1    | 608833 | regulator of telomere elongation<br>helicase 1                                                                                                                                                                                                                                               |  |
|  |  |  | TNFRSF6B | 603361 | This gene belongs to the tumor<br>necrosis factor receptor superfamily.<br>The encoded protein is postulated to<br>play a regulatory role in suppressing<br>FasL- and LIGHT-mediated cell<br>death. It acts as a decoy receptor that<br>competes with death receptors for<br>ligand binding. |  |
|  |  |  | ARFRP1   | 604699 | The protein encoded by this gene is a<br>membrane-associated GTP-ase and<br>localizes to the plasma membrane.                                                                                                                                                                                |  |
|  |  |  | LIME1    | 609809 | Lck interacting transmembrane<br>adaptor 1                                                                                                                                                                                                                                                   |  |
|  |  |  | SLC2A4RG | 609493 | The protein encoded by this gene is a<br>nuclear transcription factor involved in<br>the activation of the solute carrier<br>family 2 member 4 gene.                                                                                                                                         |  |
|  |  |  | TPD52L2  | 603747 | This gene encodes a member of the                                                                                                                                                                                                                                                            |  |

|  |          |             |        |        |                                                                                                                                                                                                                                                                                                            |                                                |
|--|----------|-------------|--------|--------|------------------------------------------------------------------------------------------------------------------------------------------------------------------------------------------------------------------------------------------------------------------------------------------------------------|------------------------------------------------|
|  |          |             |        |        | tumor protein D52-like family.                                                                                                                                                                                                                                                                             |                                                |
|  |          |             | DNAJC5 | 611203 | This gene is a member of the J protein family. J proteins function in many cellular processes by regulating the ATPase activity of 70 kDa heat shock proteins. The encoded protein plays a role in membrane trafficking and protein folding, and has been shown to have anti-neurodegenerative properties. | Ceroid lipofuscinosis, neuronal, 4, Parry type |
|  |          |             | UCKL1  | 610866 | uridine-cytidine kinase 1-like 1                                                                                                                                                                                                                                                                           |                                                |
|  |          |             | PRPF6  | 613979 | The protein encoded by this gene appears to be involved in pre-mRNA splicing, possibly acting as a bridging factor between U5 and U4/U6 snRNPs in formation of the spliceosome.                                                                                                                            | Retinitis pigmentosa 60                        |
|  | 22q13.33 | duplication |        |        |                                                                                                                                                                                                                                                                                                            |                                                |
|  |          |             | BRD1   | 604589 | This gene encodes a protein of unknown function.                                                                                                                                                                                                                                                           |                                                |

|           |                |                    |         |        |                                                                                           |                                                            |
|-----------|----------------|--------------------|---------|--------|-------------------------------------------------------------------------------------------|------------------------------------------------------------|
|           |                |                    | ZBED4   | 612552 | zinc finger, BED-type containing 4                                                        |                                                            |
|           |                |                    | ALG12   | 607144 | This gene encodes a member of the glycosyltransferase 22 family.                          | Congenital disorder of glycosylation, type Ig              |
|           |                |                    | CRELD2  | 607171 | cysteine-rich with EGF-like domains 2                                                     |                                                            |
|           |                |                    | PIM3    | 610580 | PIM3 belongs to a family of protooncogenes that encode serine/threonine protein kinases   |                                                            |
|           |                |                    | IL17REL | 613414 | interleukin 17 receptor E-like                                                            |                                                            |
|           |                |                    | MLC1    | 605908 | The function of this gene product is unknown                                              | Megalencephalic leukoencephalopathy with subcortical cysts |
| <b>23</b> | <b>14q32.2</b> | <b>duplication</b> |         |        |                                                                                           |                                                            |
|           |                |                    | DLK1    | 176290 | This gene encodes a transmembrane protein containing six epidermal growth factor repeats. |                                                            |
|           |                |                    | MEG3    | 605636 | This gene is a maternally expressed imprinted gene.                                       |                                                            |
|           | 16p13.3        | duplication        |         |        |                                                                                           |                                                            |
|           |                |                    | MSLN    | 601051 | This gene encodes a precursor protein that is cleaved into two                            |                                                            |

|  |         |             |        |        |                                                                                                                                                                                                          |                             |
|--|---------|-------------|--------|--------|----------------------------------------------------------------------------------------------------------------------------------------------------------------------------------------------------------|-----------------------------|
|  |         |             |        |        | products, megakaryocyte potentiating factor and mesothelin.                                                                                                                                              |                             |
|  |         |             | CHTF18 | 613201 | CTF18, chromosome transmission fidelity factor 18 homolog ( <i>S. cerevisiae</i> )                                                                                                                       |                             |
|  |         |             | GNG13  | 607298 | Heterotrimeric G proteins, which consist of alpha (see MIM 139320), beta (see MIM 139380), and gamma subunits, function as signal transducers for the 7-transmembrane-helix G protein-coupled receptors. |                             |
|  |         |             | LMF1   | 611761 | The protein encoded by this gene resides in the endoplasmic reticulum, and is involved in the maturation and transport of lipoprotein lipase through the secretory pathway.                              | Lipase deficiency, combined |
|  | 22q13.1 | duplication |        |        |                                                                                                                                                                                                          |                             |
|  |         |             | GGA1   | 606004 | This gene encodes a member of the Golgi-localized, gamma adaptin ear-containing, ARF-binding (GGA)                                                                                                       |                             |

|  |      |             |         |        | protein family.                                                                                                                                                                                                                         |                                                                                                                                                                                                                                         |
|--|------|-------------|---------|--------|-----------------------------------------------------------------------------------------------------------------------------------------------------------------------------------------------------------------------------------------|-----------------------------------------------------------------------------------------------------------------------------------------------------------------------------------------------------------------------------------------|
|  | Xq28 | duplication |         |        |                                                                                                                                                                                                                                         |                                                                                                                                                                                                                                         |
|  |      |             | L1CAM   | 308840 | The protein encoded by this gene is an axonal glycoprotein belonging to the immunoglobulin supergene family.                                                                                                                            | Corpus callosum, partial agenesis of<br>CRASH syndrome<br>Hydrocephalus due to aqueductal stenosis<br>Hydrocephalus with congenital idiopathic intestinal pseudoobstruction<br>Hydrocephalus with Hirschsprung disease<br>MASA syndrome |
|  |      |             | AVPR2   | 300538 | This gene encodes the vasopressin receptor, type 2, also known as the V2 receptor, which belongs to the seven-transmembrane-domain G protein-coupled receptor (GPCR) superfamily, and couples to Gs thus stimulating adenylate cyclase. | Diabetes insipidus, nephrogenic<br>Nephrogenic syndrome of inappropriate antidiuresis                                                                                                                                                   |
|  |      |             | ARHGAP4 | 300023 | This gene encodes a member of the                                                                                                                                                                                                       |                                                                                                                                                                                                                                         |

|  |  |  |         |        |                                                                                                                                                                                                              |                                         |
|--|--|--|---------|--------|--------------------------------------------------------------------------------------------------------------------------------------------------------------------------------------------------------------|-----------------------------------------|
|  |  |  |         |        | rhoGAP family of proteins which play a role in the regulation of small GTP-binding proteins belonging to the RAS superfamily.                                                                                |                                         |
|  |  |  | NAA10   | 300013 | N-alpha-acetylation is among the most common post-translational protein modifications in eukaryotic cells.                                                                                                   | N-terminal acetyltransferase deficiency |
|  |  |  | RENBP   | 312420 | The gene product inhibits renin activity by forming a dimer with renin, a complex known as high molecular weight renin.                                                                                      |                                         |
|  |  |  | HCFC1   | 300019 | This gene is a member of the host cell factor family and encodes a protein with five Kelch repeats, a fibronectin-like motif, and six HCF repeats, each of which contains a highly specific cleavage signal. |                                         |
|  |  |  | TMEM187 | 300059 | This gene consists of two exons and encodes a multi-pass membrane protein.                                                                                                                                   |                                         |



|  |  |  |        |         |                                                                                                                                                                                                                                                                                       |                                                                                                                                                                                                                                                            |
|--|--|--|--------|---------|---------------------------------------------------------------------------------------------------------------------------------------------------------------------------------------------------------------------------------------------------------------------------------------|------------------------------------------------------------------------------------------------------------------------------------------------------------------------------------------------------------------------------------------------------------|
|  |  |  | IRAK1  | 300283  | This gene encodes the interleukin-1 receptor-associated kinase 1, one of two putative serine/threonine kinases that become associated with the interleukin-1 receptor (IL1R) upon stimulation.                                                                                        |                                                                                                                                                                                                                                                            |
|  |  |  | MECP2  | 300 005 | DNA methylation is the major modification of eukaryotic genomes and plays an essential role in mammalian development.<br>Human proteins MECP2, MBD1, MBD2, MBD3, and MBD4 comprise a family of nuclear proteins related by the presence in each of a methyl-CpG binding domain (MBD). | Angelman syndrome<br>Encephalopathy, neonatal severe<br>Mental retardation, X-linked syndromic, Lubs type<br>Mental retardation, X-linked, syndromic 13<br>Rett syndrome<br>Rett syndrome, preserved speech variant<br>{Autism susceptibility, X-linked 3} |
|  |  |  | OPN1LW | 300822  | This gene encodes for a light absorbing visual pigment of the opsin gene family.                                                                                                                                                                                                      | Blue cone monochromacy<br>Colorblindness, protan                                                                                                                                                                                                           |

|  |  |  |        |        |                                                                                                                                                                                                                             |                                                                                                                                                                           |
|--|--|--|--------|--------|-----------------------------------------------------------------------------------------------------------------------------------------------------------------------------------------------------------------------------|---------------------------------------------------------------------------------------------------------------------------------------------------------------------------|
|  |  |  | OPN1MW | 300821 | This gene encodes for a light absorbing visual pigment of the opsin gene family. The encoded protein is called green cone photopigment or medium-wavelength sensitive opsin.                                                | Blue cone monochromacy<br>Colorblindness, protan                                                                                                                          |
|  |  |  | TEX28  | 300092 | testis expressed 28                                                                                                                                                                                                         |                                                                                                                                                                           |
|  |  |  | TKTL1  | 300044 | The protein encoded by this gene is a transketolase that acts as a homodimer and catalyzes the conversion of sedoheptulose 7-phosphate and D-glyceraldehyde 3-phosphate to D-ribose 5-phosphate and D-xylulose 5-phosphate. |                                                                                                                                                                           |
|  |  |  | FLNA   | 300017 | The protein encoded by this gene is an actin-binding protein that crosslinks actin filaments and links actin filaments to membrane glycoproteins.                                                                           | Cardiac valvular dysplasia,<br>X-linked<br>FG syndrome 2<br>Frontometaphyseal<br>dysplasia<br>Heterotopia, periventricular<br>Heterotopia, periventricular,<br>ED variant |

|  |  |  |          |        |                                                                                                                                                                                            |                                               |
|--|--|--|----------|--------|--------------------------------------------------------------------------------------------------------------------------------------------------------------------------------------------|-----------------------------------------------|
|  |  |  |          |        | <p>Intestinal pseudoobstruction, neuronal<br/> Melnick-Needles syndrome<br/> Otopalatodigital syndrome, type I<br/> Otopalatodigital syndrome, type II<br/> Terminal osseous dysplasia</p> |                                               |
|  |  |  | EMD      | 300384 | <p>Emerin is a serine-rich nuclear membrane protein and a member of the nuclear lamina-associated protein family. It mediates membrane anchorage to the cytoskeleton.</p>                  | Emery-Dreifuss muscular dystrophy 1, X-linked |
|  |  |  | RPL10    | 312173 | <p>This gene encodes a ribosomal protein that is a component of the 60S subunit.</p>                                                                                                       | {Autism, susceptibility to, X-linked 5}       |
|  |  |  | DNASE1L1 | 300081 | <p>This gene encodes a member of the deoxyribonuclease family and the protein shows high sequence similarity to lysosomal DNase I.</p>                                                     |                                               |

|           |                |                    |        |        |                                                                                                                                                                       |                                                                                           |
|-----------|----------------|--------------------|--------|--------|-----------------------------------------------------------------------------------------------------------------------------------------------------------------------|-------------------------------------------------------------------------------------------|
|           |                |                    | TAZ    | 300394 | This gene encodes a protein that is expressed at high levels in cardiac and skeletal muscle.                                                                          | Barth syndrome<br>Cardiomyopathy, dilated, 3A<br>Left ventricular noncompaction, X-linked |
| <b>24</b> | <b>16p13.3</b> | <b>duplication</b> |        |        |                                                                                                                                                                       |                                                                                           |
|           |                |                    | SLX4   | 613278 | This gene encodes a structure-specific endonuclease subunit.                                                                                                          | Fanconi anemia, complementation group P                                                   |
|           |                |                    | DNASE1 | 125505 | This gene encodes a member of the DNase family.                                                                                                                       | {Systemic lupus erythematosus, susceptibility to}                                         |
|           |                |                    | TRAP1  | 606219 | HSP90 proteins are highly conserved molecular chaperones that have key roles in signal transduction, protein folding, protein degradation, and morphologic evolution. |                                                                                           |
|           |                |                    | CREBBP | 600140 | This gene is ubiquitously expressed and is involved in the transcriptional coactivation of many different transcription factors.                                      | Rubinstein-Taybi syndrome                                                                 |
|           |                |                    |        |        |                                                                                                                                                                       |                                                                                           |

| 26 | 9q34.2q34.3 | deletion |        |        |                                                                                                                                                                          |                                                                                                       |
|----|-------------|----------|--------|--------|--------------------------------------------------------------------------------------------------------------------------------------------------------------------------|-------------------------------------------------------------------------------------------------------|
|    |             |          | GTF3C4 | 604892 | general transcription factor IIIC,<br>polypeptide 4, 90kDa                                                                                                               |                                                                                                       |
|    |             |          | TSC1   | 605284 | This gene encodes a growth<br>inhibitory protein thought to play a<br>role in the stabilization of tuberin.                                                              | Focal cortical dysplasia,<br>Taylor balloon cell type<br>Lymphangiomyomatosis<br>Tuberous sclerosis-1 |
|    |             |          | GFI1B  | 604383 | growth factor independent 1B<br>transcription repressor                                                                                                                  |                                                                                                       |
|    |             |          | GTF3C5 | 604890 | general transcription factor IIIC,<br>polypeptide 5, 63kDa                                                                                                               |                                                                                                       |
|    |             |          | CEL    | 114840 | The protein encoded by this gene is a<br>glycoprotein secreted from the<br>pancreas into the digestive tract and<br>from the lactating mammary gland<br>into human milk. | Maturity-onset diabetes of<br>the young, type VIII                                                    |
|    |             |          | RALGDS | 601619 | ral guanine nucleotide dissociation<br>stimulator                                                                                                                        |                                                                                                       |
|    |             |          | GBGT1  | 606074 | This gene encodes a member of the<br>histo-blood group ABO gene family<br>that encodes glycosyltransferases                                                              |                                                                                                       |

|  |  |  |       |        |                                                                                                                                                             |                                       |
|--|--|--|-------|--------|-------------------------------------------------------------------------------------------------------------------------------------------------------------|---------------------------------------|
|  |  |  |       |        | with related but distinct substrate specificity.                                                                                                            |                                       |
|  |  |  | OBP2B | 604606 | odorant binding protein 2B                                                                                                                                  |                                       |
|  |  |  | ABO   | 110300 | This gene encodes proteins related to the first discovered blood group system, ABO.                                                                         | [Blood group, ABO system]             |
|  |  |  | SURF6 | 185642 | This gene is located in the surfeit gene cluster, a group of very tightly linked genes that do not share sequence similarity.                               |                                       |
|  |  |  | MED22 | 185641 | This gene is located in the surfeit gene cluster, a group of very tightly linked housekeeping genes that do not share sequence similarity.                  |                                       |
|  |  |  | RPL7A | 185640 | ribosomal protein L7a                                                                                                                                       |                                       |
|  |  |  | SURF1 | 185620 | This gene encodes a protein localized to the inner mitochondrial membrane and thought to be involved in the biogenesis of the cytochrome c oxidase complex. | Leigh syndrome, due to COX deficiency |
|  |  |  | SURF2 | 185630 | This gene is located in the surfeit                                                                                                                         |                                       |

|  |  |  |          |        |                                                                                                                                                                                                                                                                        |                                               |
|--|--|--|----------|--------|------------------------------------------------------------------------------------------------------------------------------------------------------------------------------------------------------------------------------------------------------------------------|-----------------------------------------------|
|  |  |  |          |        | gene cluster, a group of very tightly linked genes that do not share sequence similarity.                                                                                                                                                                              |                                               |
|  |  |  | SURF4    | 185660 | This gene is located in the surfait gene cluster, which is comprised of very tightly linked housekeeping genes that do not share sequence similarity. The encoded protein is a conserved integral membrane protein containing multiple putative transmembrane regions. |                                               |
|  |  |  | REXO4    | 602930 | REX4, RNA exonuclease 4 homolog ( <i>S. cerevisiae</i> )                                                                                                                                                                                                               |                                               |
|  |  |  | ADAMTS13 | 604134 | This gene encodes a member of the ADAMTS (a disintegrin and metalloproteinase with thrombospondin motif) protein family.                                                                                                                                               | Thrombotic thrombocytopenic purpura, familial |
|  |  |  | C9orf7   | 613104 | calcium channel flower domain containing 1                                                                                                                                                                                                                             |                                               |
|  |  |  | SLC2A6   | 606813 | solute carrier family 2 (facilitated glucose transporter), member 6                                                                                                                                                                                                    |                                               |

|  |  |  |          |        |                                                                                                                                           |                                                                                             |
|--|--|--|----------|--------|-------------------------------------------------------------------------------------------------------------------------------------------|---------------------------------------------------------------------------------------------|
|  |  |  | ADAMTSL2 | 612277 | This gene encodes a member of the ADAMTS (a disintegrin and metalloproteinase with thrombospondin motifs) and ADAMTS-like protein family. | Geleophysic dysplasia 1                                                                     |
|  |  |  | DBH      | 609312 | The protein encoded by this gene is an oxidoreductase belonging to the copper type II, ascorbate-dependent monooxygenase family.          | Dopamine beta-hydroxylase deficiency<br>[Dopamine-beta-hydroxylase activity levels, plasma] |
|  |  |  | SARDH    | 604455 | This gene encodes an enzyme localized to the mitochondrial matrix which catalyzes the oxidative demethylation of sarcosine.               | Sarcosinemia]                                                                               |
|  |  |  | VAV2     | 600428 | VAV2 is the second member of the VAV guanine nucleotide exchange factor family of oncogenes.                                              |                                                                                             |
|  |  |  | BRD3     | 601541 | The function of the encoded protein is not known.                                                                                         |                                                                                             |
|  |  |  | WDR5     | 609012 | This gene encodes a member of the WD repeat protein family. WD                                                                            |                                                                                             |



|  |  |  |          |        |                                                                                                                                                                                                         |                                                                   |
|--|--|--|----------|--------|---------------------------------------------------------------------------------------------------------------------------------------------------------------------------------------------------------|-------------------------------------------------------------------|
|  |  |  |          |        | repeats are minimally conserved regions of approximately 40 amino acids typically bracketed by gly-his and trp-asp (GH-WD), which may facilitate formation of heterotrimeric or multiprotein complexes. |                                                                   |
|  |  |  | RNU6ATAC | 601429 | RNA, U6atac small nuclear (U12-dependent splicing)                                                                                                                                                      |                                                                   |
|  |  |  | RXRA     | 180245 | Retinoid X receptors (RXRs) and retinoic acid receptors (RARs), are nuclear receptors that mediate the biological effects of retinoids by their involvement in retinoic acid-mediated gene activation.  |                                                                   |
|  |  |  | COL5A1   | 120215 | This gene encodes an alpha chain for one of the low abundance fibrillar collagens.                                                                                                                      | Ehlers-Danlos syndrome, type I<br>Ehlers-Danlos syndrome, type II |
|  |  |  | FCN2     | 601624 | The product of this gene belongs to the ficolin family of proteins.                                                                                                                                     |                                                                   |
|  |  |  | FCN1     | 601252 | The ficolin family of proteins are                                                                                                                                                                      |                                                                   |

|  |         |          |          |        |                                                                                                                                                                                                                      |                         |
|--|---------|----------|----------|--------|----------------------------------------------------------------------------------------------------------------------------------------------------------------------------------------------------------------------|-------------------------|
|  |         |          |          |        | characterized by the presence of a leader peptide, a short N-terminal segment, followed by a collagen-like region, and a C-terminal fibrinogen-like domain.                                                          |                         |
|  |         |          | OLFM1    | 605366 | the exact function of the encoded protein is not known                                                                                                                                                               |                         |
|  | 14q13.1 | deletion |          |        |                                                                                                                                                                                                                      |                         |
|  |         |          | NPAS3    | 609430 | This gene encodes a member of the basic helix-loop-helix and PAS domain-containing family of transcription factors. The encoded protein is localized to the nucleus and may regulate genes involved in neurogenesis. |                         |
|  | 15q25.2 | deletion |          |        |                                                                                                                                                                                                                      |                         |
|  |         |          | ARNT2    | 606036 | This gene encodes a member of the basic-helix-loop-helix-Per-Arnt-Sim (bHLH-PAS) superfamily of transcription factors.                                                                                               |                         |
|  |         |          | KIAA1199 | 608366 | KIAA1199                                                                                                                                                                                                             | ?Deafness, nonsyndromic |

|  |         |          |       |        |                                                                                                                                                                                                                                         |                       |
|--|---------|----------|-------|--------|-----------------------------------------------------------------------------------------------------------------------------------------------------------------------------------------------------------------------------------------|-----------------------|
|  | 17p11.2 | deletion |       |        |                                                                                                                                                                                                                                         |                       |
|  |         |          | TOP3A | 601243 | This gene encodes a DNA topoisomerase, an enzyme that controls and alters the topologic states of DNA during transcription.                                                                                                             |                       |
|  |         |          | SHMT1 | 182144 | This gene encodes the cellular form of serine hydroxymethyltransferase, a pyridoxal phosphate-containing enzyme that catalyzes the reversible conversion of serine and tetrahydrofolate to glycine and 5,10-methylene tetrahydrofolate. |                       |
|  | 21q22.3 | deletion |       |        |                                                                                                                                                                                                                                         |                       |
|  |         |          | PDXK  | 179020 | The protein encoded by this gene phosphorylates vitamin B6, a step required for the conversion of vitamin B6 to pyridoxal-5-phosphate, an important cofactor in intermediary metabolism.                                                |                       |
|  |         |          | CSTB  | 601145 | The cystatin superfamily                                                                                                                                                                                                                | Epilepsy, progressive |

|           |                    |                 |        |         |                                                                                                                                                                                  |                                                  |
|-----------|--------------------|-----------------|--------|---------|----------------------------------------------------------------------------------------------------------------------------------------------------------------------------------|--------------------------------------------------|
|           |                    |                 |        |         | encompasses proteins that contain multiple cystatin-like sequences.                                                                                                              | myoclonic 1A (Unverricht and Lundborg)           |
|           |                    |                 | RRP1   | 610 653 | The protein encoded by this gene is the putative homolog of the yeast ribosomal RNA processing protein RRP1.                                                                     |                                                  |
| <b>27</b> | <b>7q36.2q36.3</b> | <b>deletion</b> |        |         |                                                                                                                                                                                  |                                                  |
|           |                    |                 | DPP6   | 126141  | This gene encodes a single-pass type II membrane protein that is a member of the S9B family in clan SC of the serine proteases.                                                  | Ventricular fibrillation, paroxysmal familial, 2 |
|           |                    |                 | PAXIP1 | 608254  | This protein plays a critical role in maintaining genome stability, condensation of chromatin and progression through mitosis.                                                   | {Alzheimer disease, susceptibility to}           |
|           |                    |                 | HTR5A  | 601 305 | The neurotransmitter serotonin (5-hydroxytryptamine, 5-HT) has been implicated in a wide range of psychiatric conditions and also has vasoconstrictive and vasodilatory effects. |                                                  |

|           |               |                    |        |        |                                                                                                                                                                               |                                                                                                                    |
|-----------|---------------|--------------------|--------|--------|-------------------------------------------------------------------------------------------------------------------------------------------------------------------------------|--------------------------------------------------------------------------------------------------------------------|
|           |               |                    | INSIG1 | 602055 | This gene is an insulin-induced gene. It encodes an endoplasmic reticulum (ER) membrane protein that plays a critical role in regulating cholesterol concentrations in cells. |                                                                                                                    |
|           |               |                    | EN2    | 131310 | engrailed homeobox 2                                                                                                                                                          | {Autism susceptibility 10}                                                                                         |
|           |               |                    | CNPY1  | 612493 | canopy 1 homolog (zebrafish)                                                                                                                                                  |                                                                                                                    |
|           |               |                    | SHH    | 600725 | This gene encodes a protein that is instrumental in patterning the early embryo.                                                                                              | Holoprosencephaly-3<br>Microphthalmia with coloboma 5<br>Schizencephaly<br>Single median maxillary central incisor |
|           |               |                    | PTPRN2 | 601698 | The protein encoded by this gene is a member of the protein tyrosine phosphatase (PTP) family.                                                                                |                                                                                                                    |
| <b>28</b> | <b>7p11.2</b> | <b>duplication</b> |        |        |                                                                                                                                                                               |                                                                                                                    |
|           |               |                    | LANCL2 | 612919 | LanC lantibiotic synthetase component C-like 2 (bacterial)                                                                                                                    |                                                                                                                    |
|           |               |                    | VOPP1  | 611915 | vesicular, overexpressed in cancer, prosurvival protein 1                                                                                                                     |                                                                                                                    |

|  |         |             |          |        |                                                                                                                                                                          |                                         |
|--|---------|-------------|----------|--------|--------------------------------------------------------------------------------------------------------------------------------------------------------------------------|-----------------------------------------|
|  | 9q32    | duplication |          |        |                                                                                                                                                                          |                                         |
|  |         |             | ZFP37    | 602951 | zinc finger protein 37 homolog<br>(mouse)                                                                                                                                |                                         |
|  | 11p15.5 | duplication |          |        |                                                                                                                                                                          |                                         |
|  |         |             | ASCL2    | 601886 | This gene is a member of the basic<br>helix-loop-helix (BHLH) family of<br>transcription factors.                                                                        |                                         |
|  |         |             | C11orf21 | 611033 | chromosome 11 open reading frame<br>21                                                                                                                                   |                                         |
|  |         |             | TSPAN32  | 603853 | This gene may play a role in<br>malignancies and diseases that<br>involve this region, and it is also<br>involved in hematopoietic cell<br>function.                     |                                         |
|  |         |             | CD81     | 186845 | CD81 molecule                                                                                                                                                            | Immunodeficiency, common<br>variable, 6 |
|  |         |             | TSSC4    | 603852 | This gene is one of several tumor-<br>suppressing subtransferable<br>fragments located in the imprinted<br>gene domain of 11p15.5, an<br>important tumor-suppressor gene |                                         |

|           |               |                 |       |        |                                                                                                                                                                             |  |
|-----------|---------------|-----------------|-------|--------|-----------------------------------------------------------------------------------------------------------------------------------------------------------------------------|--|
|           |               |                 |       |        | region. A                                                                                                                                                                   |  |
|           |               |                 | TRPM5 | 604600 | This gene encodes a member of the transient receptor potential (TRP) protein family, which is a diverse group of proteins with structural features typical of ion channels. |  |
|           | 17q21.31      | duplication     |       |        |                                                                                                                                                                             |  |
|           |               |                 | DHX8  | 600396 | DEAD box proteins, characterized by the conserved motif Asp-Glu-Ala-Asp (DEAD), are putative RNA helicases.                                                                 |  |
|           |               |                 | ETV4  | 600711 | ets variant 4                                                                                                                                                               |  |
|           |               |                 | MEOX1 | 600147 | This gene encodes a member of a subfamily of non-clustered, diverged, antennapedia-like homeobox-containing genes.                                                          |  |
| <b>30</b> | <b>3q22.3</b> | <b>deletion</b> |       |        |                                                                                                                                                                             |  |
|           |               |                 | NCK1  | 600508 | The protein encoded by this gene is one of the signaling and transforming proteins containing Src homology 2 and 3 (SH2 and SH3) domains.                                   |  |

|  |          |          |        |        |                                                                                                                                                                                                                                                                                        |  |
|--|----------|----------|--------|--------|----------------------------------------------------------------------------------------------------------------------------------------------------------------------------------------------------------------------------------------------------------------------------------------|--|
|  | 4p16.3   | deletion |        |        |                                                                                                                                                                                                                                                                                        |  |
|  |          |          | CPLX1  | 605032 | Proteins encoded by the complexin/synaphin gene family are cytosolic proteins that function in synaptic vesicle exocytosis.                                                                                                                                                            |  |
|  |          |          | GAK    | 602052 | In all eukaryotes, the cell cycle is governed by cyclin-dependent protein kinases (CDKs), whose activities are regulated by cyclins and CDK inhibitors in a diverse array of mechanisms that involve the control of phosphorylation and dephosphorylation of Ser, Thr or Tyr residues. |  |
|  | Yq11.223 | deletion |        |        |                                                                                                                                                                                                                                                                                        |  |
|  |          |          | TTY17A | 400040 | testis-specific transcript, Y-linked 17A (non-protein coding)                                                                                                                                                                                                                          |  |
|  |          |          | TTY4   | 400037 | testis-specific transcript, Y-linked 4 (non-protein coding)                                                                                                                                                                                                                            |  |
|  |          |          | BPY2   | 400013 | he encoded protein interacts with ubiquitin protein ligase E3A and may                                                                                                                                                                                                                 |  |



|           |                |                 |               |        |                                                                                                |                             |
|-----------|----------------|-----------------|---------------|--------|------------------------------------------------------------------------------------------------|-----------------------------|
|           |                |                 |               |        | be involved in male germ cell development and male infertility.                                |                             |
|           |                |                 | DAZ1          | 400003 | deleted in azoospermia 1                                                                       | ?Sertoli-cell-only syndrome |
|           |                |                 | DAZ2          | 400026 | deleted in azoospermia 2                                                                       |                             |
|           |                |                 | GOLGA2LY<br>1 | 400035 | golgin A2 pseudogene 2, Y-linked                                                               |                             |
|           |                |                 | DAZ3          | 400027 | deleted in azoospermia 3                                                                       |                             |
| <b>31</b> | <b>1p36.32</b> | <b>deletion</b> |               |        |                                                                                                |                             |
|           |                |                 | PLCH2         | 612836 | phospholipase C, eta 2                                                                         |                             |
|           |                |                 | PANK4         | 606162 | This gene encodes a protein belonging to the pantothenate kinase family.                       |                             |
|           |                |                 | HES5          | 607348 | This gene encodes a member of a family of basic helix-loop-helix transcriptional repressors.   |                             |
|           |                |                 | TNFRSF14      | 602746 | tumor necrosis factor receptor superfamily, member 14                                          |                             |
|           | 4p16.3         | deletion        |               |        |                                                                                                |                             |
|           |                |                 | CPLX1         | 605032 | Proteins encoded by the complexin/synaphin gene family are cytosolic proteins that function in |                             |

|  |          |          |      |        |                                                                                                                                                                                                                                                                                                                                                                                         |  |
|--|----------|----------|------|--------|-----------------------------------------------------------------------------------------------------------------------------------------------------------------------------------------------------------------------------------------------------------------------------------------------------------------------------------------------------------------------------------------|--|
|  |          |          |      |        | synaptic vesicle exocytosis.                                                                                                                                                                                                                                                                                                                                                            |  |
|  |          |          | GAK  | 602052 | <p>Cyclins are molecules that possess a consensus domain called the 'cyclin box.'</p> <p>In mammalian cells, 9 cyclin species have been identified, and they are referred to as cyclins A through I. Cyclin G is a direct transcriptional target of the p53 tumor suppressor gene product and thus functions downstream of p53. GAK is an association partner of cyclin G and CDK5.</p> |  |
|  | 20q13.33 | deletion |      |        |                                                                                                                                                                                                                                                                                                                                                                                         |  |
|  |          |          | CDH4 | 603006 | <p>This gene is a classical cadherin from the cadherin superfamily. The encoded protein is a calcium-dependent cell-cell adhesion glycoprotein comprised of five extracellular cadherin repeats, a transmembrane region and a highly</p>                                                                                                                                                |  |

|           |              |                 |          |        |                                                                                                                                                              |                             |
|-----------|--------------|-----------------|----------|--------|--------------------------------------------------------------------------------------------------------------------------------------------------------------|-----------------------------|
|           |              |                 |          |        | conserved cytoplasmic tail.                                                                                                                                  |                             |
| <b>32</b> | <b>14q12</b> | <b>deletion</b> |          |        |                                                                                                                                                              |                             |
|           |              |                 | CEBPE    | 600749 | The protein encoded by this gene is a bZIP transcription factor which can bind as a homodimer to certain DNA regulatory regions.                             | Specific granule deficiency |
|           |              |                 | SLC7A8   | 604235 | solute carrier family 7 (amino acid transporter light chain, L system), member 8                                                                             |                             |
|           | Xq13.1       | deletion        |          |        |                                                                                                                                                              |                             |
|           |              |                 | ZMYM3    | 300061 | This gene is located on the X chromosome and is subject to X inactivation. It is highly conserved in vertebrates and most abundantly expressed in the brain. |                             |
|           |              |                 | NONO     | 300084 | This gene encodes an RNA-binding protein which plays various roles in the nucleus, including transcriptional regulation and RNA splicing.                    |                             |
|           |              |                 | ITGB1BP2 | 300332 | integrin beta 1 binding protein (melusin) 2                                                                                                                  |                             |

|  |        |          |         |        |                                                                                                                                                                                                                                         |                                                                                       |
|--|--------|----------|---------|--------|-----------------------------------------------------------------------------------------------------------------------------------------------------------------------------------------------------------------------------------------|---------------------------------------------------------------------------------------|
|  |        |          | TAF1    | 313650 | This gene encodes the largest subunit of TFIID.                                                                                                                                                                                         | Dystonia-Parkinsonism, X-linked                                                       |
|  | Xq22.1 | deletion |         |        |                                                                                                                                                                                                                                         |                                                                                       |
|  |        |          | CSTF2   | 600368 | This gene encodes a nuclear protein with an RRM (RNA recognition motif) domain.                                                                                                                                                         |                                                                                       |
|  |        |          | NOX1    | 300225 | Voltage-gated proton (hydrogen) channels play an important role in cellular defense against acidic stress.                                                                                                                              |                                                                                       |
|  | Xq28   | deletion |         |        |                                                                                                                                                                                                                                         |                                                                                       |
|  |        |          | AVPR2   | 300538 | This gene encodes the vasopressin receptor, type 2, also known as the V2 receptor, which belongs to the seven-transmembrane-domain G protein-coupled receptor (GPCR) superfamily, and couples to Gs thus stimulating adenylate cyclase. | Diabetes insipidus, nephrogenic<br>Nephrogenic syndrome of inappropriate antidiuresis |
|  |        |          | ARHGAP4 | 300023 | This gene encodes a member of the rhoGAP family of proteins which play a role in the regulation of small GTP-binding proteins belonging to the RAS                                                                                      |                                                                                       |

|  |  |  |         |        |                                                                                                                                                                                                              |                                         |
|--|--|--|---------|--------|--------------------------------------------------------------------------------------------------------------------------------------------------------------------------------------------------------------|-----------------------------------------|
|  |  |  |         |        | superfamily.                                                                                                                                                                                                 |                                         |
|  |  |  | NAA10   | 300013 | N-alpha-acetylation is among the most common post-translational protein modifications in eukaryotic cells.                                                                                                   | N-terminal acetyltransferase deficiency |
|  |  |  | RENBP   | 312420 | The gene product inhibits renin activity by forming a dimer with renin, a complex known as high molecular weight renin.                                                                                      |                                         |
|  |  |  | HCFC1   | 300019 | This gene is a member of the host cell factor family and encodes a protein with five Kelch repeats, a fibronectin-like motif, and six HCF repeats, each of which contains a highly specific cleavage signal. |                                         |
|  |  |  | TMEM187 | 300059 | This gene consists of two exons and encodes a multi-pass membrane protein.                                                                                                                                   |                                         |
|  |  |  | IRAK1   | 300283 | This gene encodes the interleukin-1 receptor-associated kinase 1, one of two putative serine/threonine kinases                                                                                               |                                         |

|           |               |                    |        |         |                                                                                                                                                                                                                                                                                                  |                                                                                                                                                                                                                                                                                           |
|-----------|---------------|--------------------|--------|---------|--------------------------------------------------------------------------------------------------------------------------------------------------------------------------------------------------------------------------------------------------------------------------------------------------|-------------------------------------------------------------------------------------------------------------------------------------------------------------------------------------------------------------------------------------------------------------------------------------------|
|           |               |                    |        |         | that become associated with the interleukin-1 receptor (IL1R) upon stimulation.                                                                                                                                                                                                                  |                                                                                                                                                                                                                                                                                           |
|           |               |                    | MECP2  | 300 005 | <p>DNA methylation is the major modification of eukaryotic genomes and plays an essential role in mammalian development.</p> <p>Human proteins MECP2, MBD1, MBD2, MBD3, and MBD4 comprise a family of nuclear proteins related by the presence in each of a methyl-CpG binding domain (MBD).</p> | <p>Angelman syndrome</p> <p>Encephalopathy, neonatal severe</p> <p>Mental retardation, X-linked syndromic, Lubs type</p> <p>Mental retardation, X-linked, syndromic 13</p> <p>Rett syndrome</p> <p>Rett syndrome, preserved speech variant</p> <p>{Autism susceptibility, X-linked 3}</p> |
| <b>34</b> | <b>9q34.3</b> | <b>duplication</b> |        |         |                                                                                                                                                                                                                                                                                                  |                                                                                                                                                                                                                                                                                           |
|           |               |                    | COL5A1 | 120215  | This gene encodes an alpha chain for one of the low abundance fibrillar collagens.                                                                                                                                                                                                               | <p>Ehlers-Danlos syndrome, type I</p> <p>Ehlers-Danlos syndrome, type II</p>                                                                                                                                                                                                              |
|           |               |                    | FCN2   | 601624  | The product of this gene belongs to                                                                                                                                                                                                                                                              |                                                                                                                                                                                                                                                                                           |

|           |             |                 |        |        |                                                                                                                                                                                                                          |  |
|-----------|-------------|-----------------|--------|--------|--------------------------------------------------------------------------------------------------------------------------------------------------------------------------------------------------------------------------|--|
|           |             |                 |        |        | <p>the ficolin family of proteins.</p> <p>This family is characterized by the presence of a leader peptide, a short N-terminal segment, followed by a collagen-like region, and a C-terminal fibrinogen-like domain.</p> |  |
|           |             |                 | FCN1   | 601252 | <p>The ficolin family of proteins are characterized by the presence of a leader peptide, a short N-terminal segment, followed by a collagen-like region, and a C-terminal fibrinogen-like domain.</p>                    |  |
| <b>35</b> | <b>Xq25</b> | <b>deletion</b> |        |        |                                                                                                                                                                                                                          |  |
|           |             |                 | BCORL1 | 300688 | <p>The protein encoded by this gene is a transcriptional corepressor that is found tethered to promoter regions by DNA-binding proteins.</p>                                                                             |  |
|           |             |                 | ELF4   | 300775 | <p>The protein encoded by this gene is a transcriptional activator that binds and activates the promoters of the CSF2, IL3, IL8, and PRF1 genes.</p>                                                                     |  |

|  |      |          |         |        |                                                                                                                                                                                                                                         |                                                                                          |
|--|------|----------|---------|--------|-----------------------------------------------------------------------------------------------------------------------------------------------------------------------------------------------------------------------------------------|------------------------------------------------------------------------------------------|
|  |      |          | AIFM1   | 300169 | This gene encodes a flavoprotein essential for nuclear disassembly in apoptotic cells, and it is found in the mitochondrial intermembrane space in healthy cells.                                                                       | Combined oxidative phosphorylation deficiency 6                                          |
|  | Xq28 | deletion |         |        |                                                                                                                                                                                                                                         |                                                                                          |
|  |      |          | AVPR2   | 300538 | This gene encodes the vasopressin receptor, type 2, also known as the V2 receptor, which belongs to the seven-transmembrane-domain G protein-coupled receptor (GPCR) superfamily, and couples to Gs thus stimulating adenylate cyclase. | Diabetes insipidus,<br>nephrogenic<br>Nephrogenic syndrome of inappropriate antidiuresis |
|  |      |          | ARHGAP4 | 300023 | This gene encodes a member of the rhoGAP family of proteins which play a role in the regulation of small GTP-binding proteins belonging to the RAS superfamily.                                                                         |                                                                                          |
|  |      |          | NAA10   | 300013 | N-alpha-acetylation is among the most common post-translational protein modifications in eukaryotic                                                                                                                                     | N-terminal acetyltransferase deficiency                                                  |



|  |  |  |         |        |                                                                                                                                                                                                              |  |
|--|--|--|---------|--------|--------------------------------------------------------------------------------------------------------------------------------------------------------------------------------------------------------------|--|
|  |  |  |         |        | cells.                                                                                                                                                                                                       |  |
|  |  |  | RENBP   | 312420 | The gene product inhibits renin activity by forming a dimer with renin, a complex known as high molecular weight renin.                                                                                      |  |
|  |  |  | HCFC1   | 300019 | This gene is a member of the host cell factor family and encodes a protein with five Kelch repeats, a fibronectin-like motif, and six HCF repeats, each of which contains a highly specific cleavage signal. |  |
|  |  |  | TMEM187 | 300059 | This gene consists of two exons and encodes a multi-pass membrane protein.                                                                                                                                   |  |
|  |  |  | IRAK1   | 300283 | This gene encodes the interleukin-1 receptor-associated kinase 1, one of two putative serine/threonine kinases that become associated with the interleukin-1 receptor (IL1R) upon stimulation.               |  |

|           |             |                 |       |         |                                                                                                                                                                                                                                                                                                  |                                                                                                                                                                                                                                                                                           |
|-----------|-------------|-----------------|-------|---------|--------------------------------------------------------------------------------------------------------------------------------------------------------------------------------------------------------------------------------------------------------------------------------------------------|-------------------------------------------------------------------------------------------------------------------------------------------------------------------------------------------------------------------------------------------------------------------------------------------|
|           |             |                 | MECP2 | 300 005 | <p>DNA methylation is the major modification of eukaryotic genomes and plays an essential role in mammalian development.</p> <p>Human proteins MECP2, MBD1, MBD2, MBD3, and MBD4 comprise a family of nuclear proteins related by the presence in each of a methyl-CpG binding domain (MBD).</p> | <p>Angelman syndrome</p> <p>Encephalopathy, neonatal severe</p> <p>Mental retardation, X-linked syndromic, Lubs type</p> <p>Mental retardation, X-linked, syndromic 13</p> <p>Rett syndrome</p> <p>Rett syndrome, preserved speech variant</p> <p>{Autism susceptibility, X-linked 3}</p> |
| <b>38</b> | <b>Xq12</b> | <b>deletion</b> |       |         |                                                                                                                                                                                                                                                                                                  |                                                                                                                                                                                                                                                                                           |
|           |             |                 | AR    | 313700  | <p>The androgen receptor gene is more than 90 kb long and codes for a protein that has 3 major functional domains: the N-terminal domain, DNA-binding domain, and androgen-binding domain. The protein functions as a steroid-hormone activated transcription factor.</p>                        | <p>Androgen insensitivity</p> <p>Androgen insensitivity, partial, with or without breast cancer</p> <p>Hypospadias 1, X-linked</p> <p>Spinal and bulbar muscular atrophy of Kennedy</p> <p>{Prostate cancer,</p>                                                                          |

|           |                |                 |        |        |                                                                                                                                                                |                                                                                                                                            |
|-----------|----------------|-----------------|--------|--------|----------------------------------------------------------------------------------------------------------------------------------------------------------------|--------------------------------------------------------------------------------------------------------------------------------------------|
|           |                |                 |        |        |                                                                                                                                                                | susceptibility to}                                                                                                                         |
| <b>39</b> | <b>13q14.3</b> | <b>deletion</b> |        |        |                                                                                                                                                                |                                                                                                                                            |
|           |                |                 | RB1    | 614041 | The protein encoded by this gene is a negative regulator of the cell cycle and was the first tumor suppressor gene found.                                      | Bladder cancer, somatic<br>Osteosarcoma, somatic<br>Retinoblastoma<br>Retinoblastoma, trilateral<br>Small cell cancer of the lung, somatic |
|           |                |                 | LPAR6  | 609239 | The protein encoded by this gene belongs to the family of G-protein coupled receptors, that are preferentially activated by adenosine and uridine nucleotides. | Hypotrichosis 8<br>Woolly hair, autosomal recessive 1, with or without hypotrichosis                                                       |
|           |                |                 | RCBTB2 | 603524 | This gene encodes a member of the RCC1-related GEF family.                                                                                                     |                                                                                                                                            |
|           | Xp22.2         | deletion        |        |        |                                                                                                                                                                |                                                                                                                                            |
|           |                |                 | MID1   | 300552 | The protein encoded by this gene is a member of the tripartite motif (TRIM) family, also known as the 'RING-B                                                  | Opitz GBBB syndrome, type I                                                                                                                |

|           |               |                    |        |        |                                                                                                                                                                                                                                                 |                                                  |
|-----------|---------------|--------------------|--------|--------|-------------------------------------------------------------------------------------------------------------------------------------------------------------------------------------------------------------------------------------------------|--------------------------------------------------|
|           |               |                    |        |        | box-coiled coil' (RBCC) subgroup of RING finger proteins.                                                                                                                                                                                       |                                                  |
| <b>40</b> | <b>5q13.2</b> | <b>duplication</b> |        |        |                                                                                                                                                                                                                                                 |                                                  |
|           |               |                    | SMN2   | 601627 | This protein forms heteromeric complexes with proteins such as SIP1 and GEMIN4, and also interacts with several proteins known to be involved in the biogenesis of snRNPs, such as hnRNP U protein and the small nucleolar RNA binding protein. | {Spinal muscular atrophy, type III, modifier of} |
|           |               |                    | SERF1A | 603011 | The function of this protein is not known                                                                                                                                                                                                       |                                                  |
|           |               |                    | NAIP   | 600355 | The protein encoded by this gene contains regions of homology to two baculovirus inhibitor of apoptosis proteins, and it is able to suppress apoptosis induced by various signals.                                                              |                                                  |
|           |               |                    | GTF2H2 | 601748 | pro-melanin-concentrating hormone-like 2, pseudogene                                                                                                                                                                                            |                                                  |
|           |               |                    | PMCHL2 | 176794 | . The encoded protein localizes to concentrated aggregates in the                                                                                                                                                                               |                                                  |

|           |                 |                 |        |        |                                                                                                                                                                                                           |                                                 |
|-----------|-----------------|-----------------|--------|--------|-----------------------------------------------------------------------------------------------------------------------------------------------------------------------------------------------------------|-------------------------------------------------|
|           |                 |                 |        |        | nucleus, and is required for transcription from all three types of polymerase III promoters.                                                                                                              |                                                 |
|           |                 |                 | BDP1   | 607012 | The product of this gene is a subunit of the TFIIIB transcription initiation complex, which recruits RNA polymerase III to target promoters in order to initiate transcription.                           |                                                 |
|           |                 |                 | MCCC2  | 609014 | This gene encodes the small subunit of 3-methylcrotonyl-CoA carboxylase.                                                                                                                                  | 3-Methylcrotonyl-CoA carboxylase 2 deficiency   |
| <b>41</b> | <b>12q24.31</b> | <b>deletion</b> |        |        |                                                                                                                                                                                                           |                                                 |
|           |                 |                 | EIF2B1 | 606686 | This gene encodes one of five subunits of eukaryotic translation initiation factor 2B (EIF2B), a GTP exchange factor for eukaryotic initiation factor 2 and an essential regulator for protein synthesis. | Leukoencephalopathy with vanishing white matter |
|           |                 |                 | GTF2H3 | 601750 | general transcription factor IIH, polypeptide 3, 34kDa                                                                                                                                                    |                                                 |
|           |                 |                 | TCTN2  | 613846 | This gene encodes a type I membrane protein that belongs to the                                                                                                                                           | Meckel syndrome, type 8                         |

|  |          |          |          |        |                                                                                                                                                                                                                                                                                     |                                                                    |
|--|----------|----------|----------|--------|-------------------------------------------------------------------------------------------------------------------------------------------------------------------------------------------------------------------------------------------------------------------------------------|--------------------------------------------------------------------|
|  |          |          |          |        | tectonic family.                                                                                                                                                                                                                                                                    |                                                                    |
|  |          |          | ATP6V0A2 | 611716 | The protein encoded by this gene is a subunit of the vacuolar ATPase (v-ATPase), an heteromultimeric enzyme that is present in intracellular vesicles and in the plasma membrane of specialized cells, and which is essential for the acidification of diverse cellular components. | Cutis laxa, autosomal recessive, type IIA<br>Wrinkly skin syndrome |
|  | 20q13.13 | deletion |          |        |                                                                                                                                                                                                                                                                                     |                                                                    |
|  |          |          | KCNB1    | 600397 | Voltage-gated potassium (Kv) channels represent the most complex class of voltage-gated ion channels from both functional and structural standpoints.                                                                                                                               |                                                                    |
|  |          |          | PTGIS    | 601699 | This gene encodes a member of the cytochrome P450 superfamily of enzymes. The cytochrome P450 proteins are monooxygenases which catalyze many reactions involved in drug metabolism and synthesis of                                                                                | Hypertension, essential                                            |

|           |                |                 |         |        |                                                                                                                                                                                                                                |                                                                                         |
|-----------|----------------|-----------------|---------|--------|--------------------------------------------------------------------------------------------------------------------------------------------------------------------------------------------------------------------------------|-----------------------------------------------------------------------------------------|
|           |                |                 |         |        | cholesterol, steroids and other lipids.                                                                                                                                                                                        |                                                                                         |
|           | Xq21.1         | deletion        |         |        |                                                                                                                                                                                                                                |                                                                                         |
|           |                |                 | DMD     | 300377 | Dystrophin is part of the dystrophin-glycoprotein complex (DGC), which bridges the inner cytoskeleton (F-actin) and the extra-cellular matrix.                                                                                 | Becker muscular dystrophy<br>Cardiomyopathy, dilated, 3B<br>Duchenne muscular dystrophy |
|           | Xq13.3         | deletion        |         |        |                                                                                                                                                                                                                                |                                                                                         |
|           |                |                 | ZDHHC15 | 300576 | The protein encoded by this gene belongs to the DHHC palmitoyltransferase family.                                                                                                                                              | Mental retardation, X-linked<br>91                                                      |
| <b>42</b> | <b>1p36.32</b> | <b>deletion</b> |         |        |                                                                                                                                                                                                                                |                                                                                         |
|           |                |                 | PLCH2   | 612836 | PLCH2 is a member of the PLC-eta family of the phosphoinositide-specific phospholipase C (PLC) superfamily of enzymes that cleave PtdIns(4,5) P2 to generate second messengers inositol 1,4,5-trisphosphate and diacylglycerol |                                                                                         |
|           |                |                 | PANK4   | 606162 | This gene encodes a protein belonging to the pantothenate kinase family. Pantothenate kinase is a key                                                                                                                          |                                                                                         |

|  |  |  |          |        |                                                                                                                                                                                                                                        |  |
|--|--|--|----------|--------|----------------------------------------------------------------------------------------------------------------------------------------------------------------------------------------------------------------------------------------|--|
|  |  |  |          |        | regulatory enzyme in the biosynthesis of coenzyme A (CoA) in bacteria and mammalian cells.                                                                                                                                             |  |
|  |  |  | HES5     | 607348 | This gene encodes a member of a family of basic helix-loop-helix transcriptional repressors. The protein product of this gene, which is activated downstream of the Notch pathway, regulates cell differentiation in multiple tissues. |  |
|  |  |  | TNFRSF14 | 602746 | The protein encoded by this gene is a member of the TNF-receptor superfamily. This receptor was identified as a cellular mediator of herpes simplex virus (HSV) entry.                                                                 |  |
|  |  |  | ACTRT2   | 608535 | The protein encoded by this intronless gene belongs to the actin family.                                                                                                                                                               |  |
|  |  |  | PRDM16   | 605557 | The protein encoded by this gene is a zinc finger transcription factor and contains an N-terminal PR domain.                                                                                                                           |  |



|  | 5p15.33 | deletion |        |        |                                                                                                                                                                                                           |  |
|--|---------|----------|--------|--------|-----------------------------------------------------------------------------------------------------------------------------------------------------------------------------------------------------------|--|
|  |         |          | AHRR   | 606517 | The protein encoded by this gene participates in the aryl hydrocarbon receptor (AhR) signaling cascade, which mediates dioxin toxicity, and is involved in regulation of cell growth and differentiation. |  |
|  |         |          | EXOC3  | 608186 | The protein encoded by this gene is a component of the exocyst complex, a multiple protein complex essential for targeting exocytic vesicles to specific docking sites on the plasma membrane.            |  |
|  |         |          | SLC9A3 | 182307 | solute carrier family 9, subfamily A (NHE3, cation proton antiporter 3), member 3                                                                                                                         |  |
|  |         |          | TPPP   | 608773 | tubulin polymerization promoting protein                                                                                                                                                                  |  |
|  |         |          | TRIP13 | 604507 | This gene encodes a protein that interacts with thyroid hormone receptors, also known as hormone-                                                                                                         |  |

|  |  |  |         |        |                                                                                                                                                                                                                                                                                                                                           |                                                                 |
|--|--|--|---------|--------|-------------------------------------------------------------------------------------------------------------------------------------------------------------------------------------------------------------------------------------------------------------------------------------------------------------------------------------------|-----------------------------------------------------------------|
|  |  |  |         |        | dependent transcription factors.                                                                                                                                                                                                                                                                                                          |                                                                 |
|  |  |  | NKD2    | 607852 | naked cuticle homolog 2 (Drosophila)                                                                                                                                                                                                                                                                                                      |                                                                 |
|  |  |  | SLC12A7 | 604879 | solute carrier family 12<br>(potassium/chloride transporters),<br>member 7                                                                                                                                                                                                                                                                |                                                                 |
|  |  |  | SLC6A19 | 608893 | This gene encodes a system B(0)<br>transmembrane protein that actively<br>transports most neutral amino acids<br>across the apical membrane of<br>epithelial cells.                                                                                                                                                                       | Hartnup disorder<br>Hyperglycinuria<br>Iminoglycinuria, digenic |
|  |  |  | SLC6A18 | 610300 | The SLC6 family of proteins, which<br>includes SLC6A18, act as specific<br>transporters for neurotransmitters,<br>amino acids, and osmolytes like<br>betaine,<br>taurine, and creatine. SLC6 proteins<br>are sodium cotransporters that derive<br>the energy for solute transport from<br>the electrochemical gradient for<br>sodium ions |                                                                 |

|  |  |  |         |        |                                                                                                                                       |                                                                                                                                                                                                                                              |
|--|--|--|---------|--------|---------------------------------------------------------------------------------------------------------------------------------------|----------------------------------------------------------------------------------------------------------------------------------------------------------------------------------------------------------------------------------------------|
|  |  |  | TERT    | 187270 | Telomerase is a ribonucleoprotein polymerase that maintains telomere ends by addition of the telomere repeat TTAGGG.                  | Dyskeratosis congenita, autosomal dominant 2<br>Dyskeratosis congenita, autosomal recessive 4<br>{Aplastic anemia, susceptibility to}<br>{Coronary artery disease, susceptibility to}<br>{Pulmonary fibrosis, idiopathic, susceptibility to} |
|  |  |  | CLPTM1L | 612585 | CLPTM1-like                                                                                                                           |                                                                                                                                                                                                                                              |
|  |  |  | SLC6A3  | 126455 | This gene encodes a dopamine transporter which is a member of the sodium- and chloride-dependent neurotransmitter transporter family. | Parkinsonism-dystonia, infantile<br>{Attention-deficit hyperactivity disorder, susceptibility to}<br>{Major affective disorder}<br>{Nicotine dependence, protection against}                                                                 |
|  |  |  | LPCAT1  | 610472 | lysophosphatidylcholine                                                                                                               |                                                                                                                                                                                                                                              |

|           |               |                 |        |        |                                                                                                                                                                          |                                                                                                          |
|-----------|---------------|-----------------|--------|--------|--------------------------------------------------------------------------------------------------------------------------------------------------------------------------|----------------------------------------------------------------------------------------------------------|
|           |               |                 |        |        | acyltransferase 1                                                                                                                                                        |                                                                                                          |
| <b>43</b> | <b>9q34.2</b> | <b>deletion</b> |        |        |                                                                                                                                                                          |                                                                                                          |
|           |               |                 | GTF3C4 | 604892 | general transcription factor IIIC,<br>polypeptide 4, 90kDa                                                                                                               |                                                                                                          |
|           |               |                 | TSC1   | 605284 | This gene encodes a growth<br>inhibitory protein thought to play a<br>role in the stabilization of tuberin.                                                              | Focal cortical dysplasia,<br>Taylor balloon cell type<br>Lymphangioliomyomatosis<br>Tuberous sclerosis-1 |
|           |               |                 | GFI1B  | 604383 | growth factor independent 1B<br>transcription repressor                                                                                                                  |                                                                                                          |
|           |               |                 | GTF3C5 | 604890 | general transcription factor IIIC,<br>polypeptide 5, 63kDa                                                                                                               |                                                                                                          |
|           |               |                 | CEL    | 114840 | The protein encoded by this gene is a<br>glycoprotein secreted from the<br>pancreas into the digestive tract and<br>from the lactating mammary gland<br>into human milk. | Maturity-onset diabetes of<br>the young, type VIII                                                       |
|           |               |                 | RALGDS | 601619 | Guanine nucleotide dissociation<br>stimulators (GDSs, or exchange<br>factors), such as RALGDS,<br>are effectors of Ras-related GTPases                                   |                                                                                                          |

|  |  |  |       |        |                                                                                                                                                            |                           |
|--|--|--|-------|--------|------------------------------------------------------------------------------------------------------------------------------------------------------------|---------------------------|
|  |  |  |       |        | (see MIM 190020) that participate in signaling for a variety of cellular processes.                                                                        |                           |
|  |  |  | GBGT1 | 606074 | This gene encodes a member of the histo-blood group ABO gene family that encodes glycosyltransferases with related but distinct substrate specificity.     |                           |
|  |  |  | OBP2B | 604606 | odorant binding protein 2B                                                                                                                                 |                           |
|  |  |  | ABO   | 110300 | This gene encodes proteins related to the first discovered blood group system, ABO. Which allele is present in an individual determines the blood group. T | [Blood group, ABO system] |
|  |  |  | SURF6 | 185642 | The gene demonstrates features of a housekeeping gene, being ubiquitously expressed, and the encoded protein has been localized to the nucleolus.          |                           |
|  |  |  | MED22 | 185641 | The encoded proteins are localized to the cytoplasm.                                                                                                       |                           |

|  |  |  |       |        |                                                                                                                                                                                                                               |                                       |
|--|--|--|-------|--------|-------------------------------------------------------------------------------------------------------------------------------------------------------------------------------------------------------------------------------|---------------------------------------|
|  |  |  | RPL7A | 185640 | This gene rearranges with the trk proto-oncogene to form the chimeric oncogene trk-2h, which encodes an oncoprotein consisting of the N terminus of ribosomal protein L7a fused to the receptor tyrosine kinase domain of trk |                                       |
|  |  |  | SURF1 | 185620 | This gene encodes a protein localized to the inner mitochondrial membrane and thought to be involved in the biogenesis of the cytochrome c oxidase complex.                                                                   | Leigh syndrome, due to COX deficiency |
|  |  |  | SURF2 | 185630 | This gene is located in the surfait gene cluster, a group of very tightly linked genes that do not share sequence similarity.                                                                                                 |                                       |
|  |  |  | SURF4 | 185660 | This gene is located in the surfait gene cluster, which is comprised of very tightly linked housekeeping genes that do not share sequence similarity. The encoded protein is a                                                |                                       |

|  |         |          |          |        |                                                                                                                          |                                               |
|--|---------|----------|----------|--------|--------------------------------------------------------------------------------------------------------------------------|-----------------------------------------------|
|  |         |          |          |        | conserved integral membrane protein containing multiple putative transmembrane regions.                                  |                                               |
|  |         |          | REXO4    | 602930 | REX4, RNA exonuclease 4 homolog ( <i>S. cerevisiae</i> )                                                                 |                                               |
|  |         |          | ADAMTS13 | 604134 | This gene encodes a member of the ADAMTS (a disintegrin and metalloproteinase with thrombospondin motif) protein family. | Thrombotic thrombocytopenic purpura, familial |
|  |         |          | C9orf7   | 613104 | calcium channel flower domain containing 1                                                                               |                                               |
|  |         |          | SLC2A6   | 606813 | solute carrier family 2 (facilitated glucose transporter), member 6                                                      |                                               |
|  | 21q22.3 | deletion |          |        |                                                                                                                          |                                               |
|  |         |          | HSF2BP   | 604554 | heat shock transcription factor 2 binding protein                                                                        |                                               |
|  |         |          | RRP1B    | 610654 | ribosomal RNA processing 1 homolog B ( <i>S. cerevisiae</i> )                                                            |                                               |
|  |         |          | PDXK     | 179020 | The protein encoded by this gene phosphorylates vitamin B6, a step required for the conversion of vitamin                |                                               |

|           |                |                 |        |        |                                                                                                                                                                                                                                                                  |                                                              |
|-----------|----------------|-----------------|--------|--------|------------------------------------------------------------------------------------------------------------------------------------------------------------------------------------------------------------------------------------------------------------------|--------------------------------------------------------------|
|           |                |                 |        |        | B6 to pyridoxal-5-phosphate, an important cofactor in intermediary metabolism.                                                                                                                                                                                   |                                                              |
|           |                |                 | CSTB   | 601145 | This gene encodes a stefin that functions as an intracellular thiol protease inhibitor.                                                                                                                                                                          | Epilepsy, progressive myoclonic 1A (Unverricht and Lundborg) |
|           |                |                 | RRP1   | 610653 | The protein encoded by this gene is the putative homolog of the yeast ribosomal RNA processing protein RRP1.<br>The encoded protein is involved in the late stages of nucleologenesis at the end of mitosis, and may be required for the generation of 28S rRNA. |                                                              |
| <b>44</b> | <b>11q23.3</b> | <b>deletion</b> |        |        |                                                                                                                                                                                                                                                                  |                                                              |
|           |                |                 | POU2F3 | 607394 | This gene encodes a member of the POU domain family of transcription factors. POU domain transcription factors bind to a specific octamer DNA motif and regulate cell type-                                                                                      |                                                              |



|  |       |             |          |        |                                                                                                                                                 |                                                                               |
|--|-------|-------------|----------|--------|-------------------------------------------------------------------------------------------------------------------------------------------------|-------------------------------------------------------------------------------|
|  |       |             |          |        | specific differentiation pathways.                                                                                                              |                                                                               |
|  |       |             | ARHGEF12 | 604763 | The encoded protein may form a complex with G proteins and stimulate Rho-dependent signals.                                                     | Leukemia, acute myeloid                                                       |
|  | 16q21 | duplication |          |        |                                                                                                                                                 |                                                                               |
|  |       |             | HERPUD1  | 608070 | This gene may play a role in both UPR and ERAD                                                                                                  |                                                                               |
|  |       |             | CETP     | 118470 | Cholesteryl ester transfer protein (CETP) transfers cholesteryl esters between lipoproteins. CETP may effect susceptibility to atherosclerosis. | Hyperalphalipoproteinemia [High density lipoprotein cholesterol level QTL 10] |
|  |       |             | NLRC5    | 613537 | This gene encodes a member of the caspase recruitment domain-containing NLR family.                                                             |                                                                               |
|  |       |             | CPNE2    | 604206 | Calcium-dependent membrane-binding proteins may regulate molecular events at the interface of the cell membrane and cytoplasm.                  |                                                                               |
|  |       |             | CPNE2    | 600340 | plasmolipin                                                                                                                                     |                                                                               |
|  |       |             | CCL22    | 602957 | The product of this gene binds to chemokine receptor CCR4.                                                                                      |                                                                               |

|  |  |  |         |        |                                                                                                                                                                                                   |                                          |
|--|--|--|---------|--------|---------------------------------------------------------------------------------------------------------------------------------------------------------------------------------------------------|------------------------------------------|
|  |  |  | CX3CL1  | 601880 | chemokine (C-X3-C motif) ligand 1                                                                                                                                                                 |                                          |
|  |  |  | CCL17   | 601520 | The product of this gene binds to chemokine receptors CCR4 and CCR8.                                                                                                                              |                                          |
|  |  |  | CIAPIN1 | 608943 | cytokine induced apoptosis inhibitor 1                                                                                                                                                            |                                          |
|  |  |  | COQ9    | 612837 | The encoded protein is likely necessary for biosynthesis of coenzyme Q10, as mutations at this locus have been associated with autosomal-recessive neonatal-onset primary coenzyme Q10 deficiency | Coenzyme Q10 deficiency                  |
|  |  |  | POLR2C  | 180663 | This gene encodes the third largest subunit of RNA polymerase II, the polymerase responsible for synthesizing messenger RNA in eukaryotes.                                                        |                                          |
|  |  |  | DOK4    | 608333 | docking protein 4                                                                                                                                                                                 |                                          |
|  |  |  | GPR56   | 604110 | This gene encodes a member of the G protein-coupled receptor family.                                                                                                                              | Polymicrogyria, bilateral frontoparietal |
|  |  |  |         |        |                                                                                                                                                                                                   |                                          |

| 45 | 17q21.31 | duplication |       |        |                                                                                                                                                                                                                                                                                                                              |                                                                                        |
|----|----------|-------------|-------|--------|------------------------------------------------------------------------------------------------------------------------------------------------------------------------------------------------------------------------------------------------------------------------------------------------------------------------------|----------------------------------------------------------------------------------------|
|    |          |             | DHX8  | 600396 | DEAD box proteins, characterized by the conserved motif Asp-Glu-Ala-Asp (DEAD), are putative RNA helicases. They are implicated in a number of cellular processes involving alteration of RNA secondary structure such as translation initiation, nuclear and mitochondrial splicing, and ribosome and spliceosome assembly. |                                                                                        |
|    |          |             | ETV4  | 600711 | ets variant 4                                                                                                                                                                                                                                                                                                                |                                                                                        |
|    |          |             | MEOX1 | 600147 | This gene encodes a member of a subfamily of non-clustered, diverged, antenapedia-like homeobox-containing genes.                                                                                                                                                                                                            |                                                                                        |
|    | Xq13.1   | deletion    |       |        |                                                                                                                                                                                                                                                                                                                              |                                                                                        |
|    |          |             | EDA   | 300451 | The protein encoded by this gene is a type II membrane protein that can be cleaved by furin to produce a secreted form.                                                                                                                                                                                                      | Ectodermal dysplasia, anhidrotic, X-linked<br>Tooth agenesis, selective,<br>X-linked 1 |
|    |          |             |       |        |                                                                                                                                                                                                                                                                                                                              |                                                                                        |

|           |               |                    |        |        |                                                                                                                       |                                                                             |
|-----------|---------------|--------------------|--------|--------|-----------------------------------------------------------------------------------------------------------------------|-----------------------------------------------------------------------------|
| <b>46</b> | <b>2q36.1</b> | <b>duplication</b> |        |        |                                                                                                                       |                                                                             |
|           |               |                    | EPHA4  | 602188 | This gene belongs to the ephrin receptor subfamily of the protein-tyrosine kinase family.                             |                                                                             |
|           | 10q26.3       | duplication        |        |        |                                                                                                                       |                                                                             |
|           |               |                    | ADAM8  | 602267 | This gene encodes a member of the ADAM (a disintegrin and metalloprotease domain) family.                             |                                                                             |
|           |               |                    | CALY   | 604647 | The protein encoded by this gene is a type II single transmembrane protein.                                           |                                                                             |
|           |               |                    | PRAP1  | 609776 | proline-rich acidic protein 1                                                                                         |                                                                             |
|           |               |                    | ECHS1  | 602292 | The protein encoded by this gene functions in the second step of the mitochondrial fatty acid beta-oxidation pathway. |                                                                             |
|           |               |                    | SPRN   | 610447 | shadow of prion protein homolog (zebrafish)                                                                           |                                                                             |
|           | Xp22.31       | deletion           |        |        |                                                                                                                       |                                                                             |
|           |               |                    | NLGN4X | 300427 | This gene encodes a member of a family of neuronal cell surface proteins.                                             | Mental retardation, X-linked {Asperger syndrome susceptibility, X-linked 2} |

|           |                |                    |        |        |                                                                                                                                                                                                                      |                                     |
|-----------|----------------|--------------------|--------|--------|----------------------------------------------------------------------------------------------------------------------------------------------------------------------------------------------------------------------|-------------------------------------|
|           |                |                    |        |        |                                                                                                                                                                                                                      | {Autism susceptibility, X-linked 2} |
| <b>47</b> | <b>7q11.23</b> | <b>duplication</b> |        |        |                                                                                                                                                                                                                      |                                     |
|           |                |                    | UPK3B  | 611887 | UPK3B is a minor component of the apical plaques of mammalian urothelium that binds and dimerizes with uroplakin-1b (UPK1B; MIM 602380), one of the major conserved urothelium membrane proteins.                    |                                     |
|           |                |                    | POMZP3 | 600587 | This gene appears to have resulted from a fusion of DNA sequences derived from 2 distinct loci, specifically through the duplication of two internal exons from the POM121 gene and four 3' exons from the ZP3 gene. |                                     |
|           | 17q21.31       | duplications       |        |        |                                                                                                                                                                                                                      |                                     |
|           |                |                    | DHX8   | 600396 | DEAD box proteins, characterized by the conserved motif Asp-Glu-Ala-Asp (DEAD), are putative RNA helicases.                                                                                                          |                                     |
|           |                |                    | ETV4   | 600711 | ets variant 4                                                                                                                                                                                                        |                                     |

|           |             |                    |         |        |                                                                                                                                                                                                                                               |                                                     |
|-----------|-------------|--------------------|---------|--------|-----------------------------------------------------------------------------------------------------------------------------------------------------------------------------------------------------------------------------------------------|-----------------------------------------------------|
|           |             |                    | MEOX1   | 600147 | This gene encodes a member of a subfamily of non-clustered, diverged, antennapedia-like homeobox-containing genes.                                                                                                                            |                                                     |
| <b>48</b> | <b>Xq28</b> | <b>deletion</b>    |         |        |                                                                                                                                                                                                                                               |                                                     |
|           |             |                    | RAB39B  | 300774 | This gene encodes a member of the Rab family of proteins.                                                                                                                                                                                     | Mental retardation, X-linked<br>72                  |
|           |             |                    | CLIC2   | 300138 | Chloride channels are a diverse group of proteins that regulate fundamental cellular processes including stabilization of cell membrane potential, transepithelial transport, maintenance of intracellular pH, and regulation of cell volume. |                                                     |
| <b>49</b> | <b>6q27</b> | <b>duplication</b> |         |        |                                                                                                                                                                                                                                               |                                                     |
|           |             |                    | RNASET2 | 612944 | ribonuclease T2                                                                                                                                                                                                                               | Leukoencephalopathy, cystic, without megalencephaly |
|           |             |                    | FGFR1OP | 605392 | This gene encodes a largely hydrophilic protein postulated to be a                                                                                                                                                                            | Myeloproliferative disorder                         |

|  |          |             |          |        |                                                                                                                                                   |                                                                                                                                              |
|--|----------|-------------|----------|--------|---------------------------------------------------------------------------------------------------------------------------------------------------|----------------------------------------------------------------------------------------------------------------------------------------------|
|  |          |             |          |        | leucine-rich protein family member                                                                                                                |                                                                                                                                              |
|  | 13q12.13 | duplication |          |        |                                                                                                                                                   |                                                                                                                                              |
|  |          |             | SPATA13  | 613324 | spermatogenesis associated 13                                                                                                                     |                                                                                                                                              |
|  | 21q22.3  | duplication |          |        |                                                                                                                                                   |                                                                                                                                              |
|  |          |             |          |        |                                                                                                                                                   |                                                                                                                                              |
|  |          |             | ABCG1    | 603076 | The protein encoded by this gene is a member of the superfamily of ATP-binding cassette (ABC) transporters.                                       |                                                                                                                                              |
|  |          |             | TFF3     | 600633 | trefoil factor 3 (intestinal)                                                                                                                     |                                                                                                                                              |
|  |          |             | TFF2     | 182590 | trefoil factor 2                                                                                                                                  |                                                                                                                                              |
|  | Xp11.22  | deletion    |          |        |                                                                                                                                                   |                                                                                                                                              |
|  |          |             | SMC1A    | 300040 | Proper cohesion of sister chromatids is a prerequisite for the correct segregation of chromosomes during cell division.                           | Cornelia de Lange syndrome 2                                                                                                                 |
|  |          |             | HSD17B10 | 300256 | This gene encodes 3-hydroxyacyl-CoA dehydrogenase type II, a member of the short-chain dehydrogenase/reductase superfamily. The gene product is a | 17-beta-hydroxysteroid dehydrogenase X deficiency<br>Mental retardation, X-linked<br>17/31, microduplication<br>Mental retardation, X-linked |

|  |      |  |        |        |                                                                                                                                                                                                                             |                                                          |
|--|------|--|--------|--------|-----------------------------------------------------------------------------------------------------------------------------------------------------------------------------------------------------------------------------|----------------------------------------------------------|
|  |      |  |        |        | mitochondrial protein that catalyzes the oxidation of a wide variety of fatty acids, alcohols, and steroids.                                                                                                                | syndromic 10                                             |
|  |      |  | HUWE1  | 300697 | This gene encodes a member of the HECT E3 ubiquitin ligase family.                                                                                                                                                          | Mental retardation, X-linked syndromic, Turner type      |
|  | Xq28 |  |        |        |                                                                                                                                                                                                                             |                                                          |
|  |      |  | OPN1MW | 300821 | This gene encodes for a light absorbing visual pigment of the opsin gene family.                                                                                                                                            | Blue cone monochromacy<br>Colorblindness, deutan         |
|  |      |  | TEX28  | 300092 | testis expressed 28                                                                                                                                                                                                         |                                                          |
|  |      |  | TKTL1  | 300044 | The protein encoded by this gene is a transketolase that acts as a homodimer and catalyzes the conversion of sedoheptulose 7-phosphate and D-glyceraldehyde 3-phosphate to D-ribose 5-phosphate and D-xylulose 5-phosphate. |                                                          |
|  |      |  | FLNA   | 300017 | The protein encoded by this gene is an actin-binding protein that crosslinks actin filaments and links                                                                                                                      | Cardiac valvular dysplasia,<br>X-linked<br>FG syndrome 2 |



|  |  |  |       |                                            |                                                                                                                                                                                                                                                                                                                           |                                               |
|--|--|--|-------|--------------------------------------------|---------------------------------------------------------------------------------------------------------------------------------------------------------------------------------------------------------------------------------------------------------------------------------------------------------------------------|-----------------------------------------------|
|  |  |  |       | actin filaments to membrane glycoproteins. | <p>Frontometaphyseal dysplasia</p> <p>Heterotopia, periventricular</p> <p>Heterotopia, periventricular, ED variant</p> <p>Intestinal pseudoobstruction, neuronal</p> <p>Melnick-Needles syndrome</p> <p>Otopalatodigital syndrome, type I</p> <p>Otopalatodigital syndrome, type II</p> <p>Terminal osseous dysplasia</p> |                                               |
|  |  |  | EMD   | 300384                                     | <p>Emerin is a serine-rich nuclear membrane protein and a member of the nuclear lamina-associated protein family.</p>                                                                                                                                                                                                     | Emery-Dreifuss muscular dystrophy 1, X-linked |
|  |  |  | RPL10 | 312173                                     | <p>This gene encodes a ribosomal protein that is a component of the 60S subunit.</p>                                                                                                                                                                                                                                      | {Autism, susceptibility to, X-linked 5}       |
|  |  |  | TAZ   | 300394                                     | <p>This gene encodes a protein that is</p>                                                                                                                                                                                                                                                                                | Barth syndrome                                |

|           |                |                 |          |        |                                                                                                                        |                                                                                                                                                                          |
|-----------|----------------|-----------------|----------|--------|------------------------------------------------------------------------------------------------------------------------|--------------------------------------------------------------------------------------------------------------------------------------------------------------------------|
|           |                |                 |          |        | expressed at high levels in cardiac and skeletal muscle.                                                               | Cardiomyopathy, dilated, 3A<br>Left ventricular noncompaction, X-linked                                                                                                  |
| <b>50</b> | <b>11p15.5</b> | <b>deletion</b> |          |        |                                                                                                                        |                                                                                                                                                                          |
|           |                |                 | KCNQ1OT1 | 604115 | KCNQ1 opposite strand/antisense transcript 1 (non-protein coding)                                                      | Beckwith-Wiedemann syndrome                                                                                                                                              |
|           |                |                 | KCNQ1    | 607542 | This gene encodes a voltage-gated potassium channel required for repolarization phase of the cardiac action potential. | Atrial fibrillation, familial, 3<br>Jervell and Lange-Nielsen syndrome<br>Long QT syndrome-1<br>Short QT syndrome-2<br>{Long QT syndrome 1, acquired, susceptibility to} |
|           | 17p11.2        | deletion        |          |        |                                                                                                                        |                                                                                                                                                                          |
|           |                |                 | GRAP     | 604330 | This gene encodes a member of the GRB2/Sem5/Drk family.                                                                |                                                                                                                                                                          |
|           | Xp11.22        | deletion        |          |        |                                                                                                                        |                                                                                                                                                                          |
|           |                |                 | SMC1A    | 300040 | structural maintenance of chromosomes 1A                                                                               | Cornelia de Lange syndrome 2                                                                                                                                             |
|           | Xq21.1         | deletion        |          |        |                                                                                                                        |                                                                                                                                                                          |

|  |      |          |       |        |                                                                                                                                                                                                                                                       |                                                                                                                                                                           |
|--|------|----------|-------|--------|-------------------------------------------------------------------------------------------------------------------------------------------------------------------------------------------------------------------------------------------------------|---------------------------------------------------------------------------------------------------------------------------------------------------------------------------|
|  |      |          | ATRX  | 300032 | The protein encoded by this gene contains an ATPase/helicase domain, and thus it belongs to the SWI/SNF family of chromatin remodeling proteins.                                                                                                      | Alpha-thalassemia<br>myelodysplasia syndrome,<br>somatic<br>Alpha-thalassemia/mental<br>retardation syndrome<br>Mental retardation-hypotonic<br>facies syndrome, X-linked |
|  | Xq24 | deletion |       |        |                                                                                                                                                                                                                                                       |                                                                                                                                                                           |
|  |      |          | SEPT6 | 300683 | This gene is a member of the septin family of GTPases. Members of this family are required for cytokinesis.                                                                                                                                           |                                                                                                                                                                           |
|  |      |          | RPL39 | 601904 | This gene is co-transcribed with the U69 small nucleolar RNA gene, which is located in its second intron.<br>As is typical for genes encoding ribosomal proteins, there are multiple processed pseudogenes of this gene dispersed through the genome. |                                                                                                                                                                           |
|  |      |          | UPF3B | 300298 | This gene encodes a protein that is part of a post-splicing multiprotein complex involved in both mRNA                                                                                                                                                | Mental retardation, X-linked,<br>syndromic 14                                                                                                                             |

|  |      |          |        |        |                                                                                                                                                                                                                                                                                                     |                                    |
|--|------|----------|--------|--------|-----------------------------------------------------------------------------------------------------------------------------------------------------------------------------------------------------------------------------------------------------------------------------------------------------|------------------------------------|
|  |      |          |        |        | nuclear export and mRNA surveillance.                                                                                                                                                                                                                                                               |                                    |
|  |      |          | NDUFA1 | 300078 | The human NDUFA1 gene codes for an essential component of complex I of the respiratory chain, which transfers electrons from NADH to ubiquinone.                                                                                                                                                    | Mitochondrial complex I deficiency |
|  |      |          | AKAP14 | 300462 | The A-kinase anchor proteins (AKAPs) are a group of structurally diverse proteins, which have the common function of binding to the regulatory subunit of protein kinase A (PKA) and confining the holoenzyme to discrete locations within the cell. This gene encodes a member of the AKAP family. |                                    |
|  |      |          | NKAP   | 300766 | This gene encodes a protein that is involved in the activation of the ubiquitous transcription factor NF-kappaB.                                                                                                                                                                                    |                                    |
|  | Xq28 | deletion |        |        |                                                                                                                                                                                                                                                                                                     |                                    |

|  |  |  |        |        |                                                                                                                                                                                                                             |                                                                                                                                                                                         |
|--|--|--|--------|--------|-----------------------------------------------------------------------------------------------------------------------------------------------------------------------------------------------------------------------------|-----------------------------------------------------------------------------------------------------------------------------------------------------------------------------------------|
|  |  |  | OPN1MW | 300821 | This gene encodes for a light absorbing visual pigment of the opsin gene family.                                                                                                                                            | Blue cone monochromacy<br>Colorblindness, deutan                                                                                                                                        |
|  |  |  | TEX28  | 300092 | testis expressed 28                                                                                                                                                                                                         |                                                                                                                                                                                         |
|  |  |  | TKTL1  | 300044 | The protein encoded by this gene is a transketolase that acts as a homodimer and catalyzes the conversion of sedoheptulose 7-phosphate and D-glyceraldehyde 3-phosphate to D-ribose 5-phosphate and D-xylulose 5-phosphate. |                                                                                                                                                                                         |
|  |  |  | FLNA   | 300017 | The protein encoded by this gene is an actin-binding protein that crosslinks actin filaments and links actin filaments to membrane glycoproteins.                                                                           | Cardiac valvular dysplasia,<br>X-linked<br>FG syndrome 2<br>Frontometaphyseal<br>dysplasia<br>Heterotopia, periventricular<br>Heterotopia, periventricular,<br>ED variant<br>Intestinal |

|  |  |  |         |        |                                                                                                                       |                                                                                                                                                                                           |
|--|--|--|---------|--------|-----------------------------------------------------------------------------------------------------------------------|-------------------------------------------------------------------------------------------------------------------------------------------------------------------------------------------|
|  |  |  |         |        |                                                                                                                       | <p>pseudoobstruction, neuronal<br/> Melnick-Needles syndrome<br/> Otopalatodigital syndrome,<br/> type I<br/> Otopalatodigital syndrome,<br/> type II<br/> Terminal osseous dysplasia</p> |
|  |  |  | EMD     | 300384 | <p>Emerin is a serine-rich nuclear membrane protein and a member of the nuclear lamina-associated protein family.</p> | <p>Emery-Dreifuss muscular dystrophy 1, X-linked</p>                                                                                                                                      |
|  |  |  | RPL10   | 312173 | <p>This gene encodes a ribosomal protein that is a component of the 60S subunit.</p>                                  | <p>{Autism, susceptibility to, X-linked 5}</p>                                                                                                                                            |
|  |  |  | TAZ     | 300394 | <p>This gene encodes a protein that is expressed at high levels in cardiac and skeletal muscle.</p>                   | <p>Barth syndrome<br/> Cardiomyopathy, dilated, 3A<br/> Left ventricular noncompaction, X-linked</p>                                                                                      |
|  |  |  | ATP6AP1 | 300197 | <p>This gene encodes a component of a multisubunit enzyme (1 mDa MW) that mediates acidification of</p>               |                                                                                                                                                                                           |

|  |  |  |        |        |                                                                                                                                                                                                                                                                        |                                    |
|--|--|--|--------|--------|------------------------------------------------------------------------------------------------------------------------------------------------------------------------------------------------------------------------------------------------------------------------|------------------------------------|
|  |  |  |        |        | eukaryotic intracellular organelles.                                                                                                                                                                                                                                   |                                    |
|  |  |  | GDI1   | 300104 | GDP dissociation inhibitors are proteins that regulate the GDP-GTP exchange reaction of members of the rab family, small GTP-binding proteins of the ras superfamily, that are involved in vesicular trafficking of molecules between cellular organelles.             | Mental retardation, X-linked<br>41 |
|  |  |  | FAM50A | 300453 | This gene belongs to the FAM50 family. The encoded protein is highly conserved in length and sequence across different species. It is a basic protein containing a nuclear localization signal, and may function as a DNA-binding protein or a transcriptional factor. |                                    |
|  |  |  | PLXNA3 | 300022 | The protein encoded by this gene is a member of the plexin class of proteins.                                                                                                                                                                                          |                                    |
|  |  |  | LAGE3  | 300060 | L antigen family, member 3                                                                                                                                                                                                                                             |                                    |

|  |  |  |         |        |                                                                                                                                                                                                                             |                                                                                                                                                                                                                                                              |
|--|--|--|---------|--------|-----------------------------------------------------------------------------------------------------------------------------------------------------------------------------------------------------------------------------|--------------------------------------------------------------------------------------------------------------------------------------------------------------------------------------------------------------------------------------------------------------|
|  |  |  | UBL4A   | 312070 | ubiquitin-like 4A                                                                                                                                                                                                           |                                                                                                                                                                                                                                                              |
|  |  |  | SLC10A3 | 312090 | solute carrier family 10 (sodium/bile acid cotransporter family), member 3                                                                                                                                                  |                                                                                                                                                                                                                                                              |
|  |  |  | FAM3A   | 300492 | family with sequence similarity 3, member A                                                                                                                                                                                 |                                                                                                                                                                                                                                                              |
|  |  |  | G6PD    | 305900 | This gene encodes glucose-6-phosphate dehydrogenase.                                                                                                                                                                        | Favism<br>G6PD deficiency<br>Hemolytic anemia due to G6PD deficiency                                                                                                                                                                                         |
|  |  |  | IKBKG   | 300248 | This gene encodes the regulatory subunit of the inhibitor of kappaB kinase (IKK) complex, which activates NF-kappaB resulting in activation of genes involved in inflammation, immunity, cell survival, and other pathways. | Ectodermal dysplasia, hypohidrotic, with immune deficiency<br>Ectodermal, dysplasia, anhidrotic, lymphedema and immunodeficiency<br>Immunodeficiency, isolated<br>Incontinentia pigmenti, type II<br>Invasive pneumococcal disease, recurrent isolated,<br>2 |



|           |                 |                 |         |        |                                                                                                                                          |                                                                                   |
|-----------|-----------------|-----------------|---------|--------|------------------------------------------------------------------------------------------------------------------------------------------|-----------------------------------------------------------------------------------|
|           |                 |                 |         |        |                                                                                                                                          | {Atypical mycobacteriosis, familial}                                              |
|           |                 |                 | CTAG1A  | 300657 | cancer/testis antigen 1A                                                                                                                 |                                                                                   |
|           |                 |                 | CTAG1B  | 300156 | The protein encoded by this gene is an antigen that is overexpressed in many cancers but that is also expressed in normal testis.        |                                                                                   |
|           | Xq13.3          | deletion        |         |        |                                                                                                                                          |                                                                                   |
|           |                 |                 | ZDHHC15 | 300576 | The protein encoded by this gene belongs to the DHHC palmitoyltransferase family.                                                        | Mental retardation, X-linked 91                                                   |
|           | Xq25            | deletion        |         |        |                                                                                                                                          |                                                                                   |
|           |                 |                 | SMARCA1 | 300012 | This gene encodes a member of the SWI/SNF family of proteins.                                                                            |                                                                                   |
| <b>51</b> | <b>14q32.33</b> | <b>deletion</b> |         |        |                                                                                                                                          |                                                                                   |
|           |                 |                 | INF2    | 610982 | This gene represents a member of the formin family of proteins. It is considered a diaphanous formin due to the presence of a diaphanous | Charcot-Marie-Tooth disease, dominant intermediate E<br>Glomerulosclerosis, focal |

|  |         |          |        |        |                                                                                                                                                                                                     |                                                                                                                                                       |
|--|---------|----------|--------|--------|-----------------------------------------------------------------------------------------------------------------------------------------------------------------------------------------------------|-------------------------------------------------------------------------------------------------------------------------------------------------------|
|  |         |          |        |        | inhibitory domain located at the N-terminus of the encoded protein.                                                                                                                                 | segmental, 5                                                                                                                                          |
|  |         |          | ADSSL1 | 612498 | adenylosuccinate synthase like 1                                                                                                                                                                    |                                                                                                                                                       |
|  |         |          | SIVA1  | 605567 | This gene encodes a protein with an important role in the apoptotic (programmed cell death) pathway induced by the CD27 antigen, a member of the tumor necrosis factor receptor (TNFR) superfamily. |                                                                                                                                                       |
|  |         |          | AKT1   | 164730 | v-akt murine thymoma viral oncogene homolog 1                                                                                                                                                       | Breast cancer, somatic<br>Colorectal cancer, somatic<br>Ovarian cancer, somatic<br>Proteus syndrome, somatic<br>{Schizophrenia,<br>susceptibility to} |
|  |         |          | ZBTB42 | 613915 | zinc finger and BTB domain containing 42                                                                                                                                                            |                                                                                                                                                       |
|  | 21q22.3 | deletion |        |        |                                                                                                                                                                                                     |                                                                                                                                                       |
|  |         |          | ABCG1  | 603076 | The protein encoded by this gene is a member of the superfamily of ATP-binding cassette (ABC) transporters.                                                                                         |                                                                                                                                                       |

|  |      |          |        |        |                                                                                                                                                                              |                                                  |
|--|------|----------|--------|--------|------------------------------------------------------------------------------------------------------------------------------------------------------------------------------|--------------------------------------------------|
|  |      |          | TFF3   | 603076 | Members of the trefoil family are characterized by having at least one copy of the trefoil motif, a 40-amino acid domain that contains three conserved disulfides.           |                                                  |
|  |      |          | TFF2   | 182590 | The encoded protein inhibits gastric acid secretion.                                                                                                                         |                                                  |
|  | Xq28 | deletion |        |        |                                                                                                                                                                              |                                                  |
|  |      |          | OPN1LW | 300822 | This gene encodes for a light absorbing visual pigment of the opsin gene family.                                                                                             | Blue cone monochromacy<br>Colorblindness, protan |
|  |      |          | OPN1MW | 300821 | This gene encodes for a light absorbing visual pigment of the opsin gene family. The encoded protein is called green cone photopigment or medium-wavelength sensitive opsin. | Blue cone monochromacy<br>Colorblindness, protan |
|  |      |          | TEX28  | 300092 | testis expressed 28                                                                                                                                                          |                                                  |
|  |      |          | TKTL1  | 300044 | The protein encoded by this gene is a transketolase that acts as a homodimer and catalyzes the conversion of sedoheptulose 7-                                                |                                                  |

|  |      |          |       |        |                                                                                                                                                   |                                                                                                                                                                                                                                                                                                                                                                   |
|--|------|----------|-------|--------|---------------------------------------------------------------------------------------------------------------------------------------------------|-------------------------------------------------------------------------------------------------------------------------------------------------------------------------------------------------------------------------------------------------------------------------------------------------------------------------------------------------------------------|
|  |      |          |       |        | phosphate and D-glyceraldehyde 3-phosphate to D-ribose 5-phosphate and D-xylulose 5-phosphate.                                                    |                                                                                                                                                                                                                                                                                                                                                                   |
|  |      |          | FLNA  | 300017 | The protein encoded by this gene is an actin-binding protein that crosslinks actin filaments and links actin filaments to membrane glycoproteins. | Cardiac valvular dysplasia,<br>X-linked<br>FG syndrome 2<br>Frontometaphyseal<br>dysplasia<br>Heterotopia, periventricular<br>Heterotopia, periventricular,<br>ED variant<br>Intestinal<br>pseudoobstruction, neuronal<br>Melnick-Needles syndrome<br>Otopalatodigital syndrome,<br>type I<br>Otopalatodigital syndrome,<br>type II<br>Terminal osseous dysplasia |
|  | Xq28 | deletion |       |        |                                                                                                                                                   |                                                                                                                                                                                                                                                                                                                                                                   |
|  |      |          | HAUS7 | 300540 | This gene encodes a protein                                                                                                                       |                                                                                                                                                                                                                                                                                                                                                                   |

|  |  |  |        |                                                                                                                                             |                                                                                                                                                                                                |               |
|--|--|--|--------|---------------------------------------------------------------------------------------------------------------------------------------------|------------------------------------------------------------------------------------------------------------------------------------------------------------------------------------------------|---------------|
|  |  |  |        | identified by interaction with ubiquitin C-terminal hydrolase 37, which functions to edit polyubiquitin chains on ubiquitinated substrates. |                                                                                                                                                                                                |               |
|  |  |  | BGN    | 301870                                                                                                                                      | The protein encoded by this gene is a small cellular or pericellular matrix proteoglycan that is closely related in structure to two other small proteoglycans, decorin and fibromodulin.      |               |
|  |  |  | ATP2B3 | 300014                                                                                                                                      | The protein encoded by this gene belongs to the family of P-type primary ion transport ATPases characterized by the formation of an aspartyl phosphate intermediate during the reaction cycle. |               |
|  |  |  | FAM58A | 300708                                                                                                                                      | The protein encoded by this gene contains a cyclin-box-fold domain which suggests it may have a role in controlling nuclear cell division cycles.                                              | STAR syndrome |

|           |                |                 |        |        |                                                                                                      |                                                                                                                  |
|-----------|----------------|-----------------|--------|--------|------------------------------------------------------------------------------------------------------|------------------------------------------------------------------------------------------------------------------|
|           |                |                 | DUSP9  | 300134 | The protein encoded by this gene is a member of the dual specificity protein phosphatase subfamily.  |                                                                                                                  |
|           |                |                 | PNCK   | 300680 | pregnancy up-regulated non-ubiquitously expressed CaM kinase                                         |                                                                                                                  |
| <b>52</b> | <b>1p36.33</b> | <b>deletion</b> |        |        |                                                                                                      |                                                                                                                  |
|           |                |                 | SKI    | 164780 | This gene encodes the nuclear protooncogene protein homolog of avian sarcoma viral (v-ski) oncogene. |                                                                                                                  |
|           | 5q13.2         | deletion        |        |        |                                                                                                      |                                                                                                                  |
|           |                |                 | SMN2   | 601627 | survival of motor neuron 2, centromeric                                                              | {Spinal muscular atrophy, type III, modifier of}                                                                 |
|           |                |                 | SERF1A | 603011 | small EDRK-rich factor 1A (telomeric)                                                                |                                                                                                                  |
|           |                |                 | SMN1   | 600354 | survival of motor neuron 1, telomeric                                                                | Spinal muscular atrophy-1<br>Spinal muscular atrophy-2<br>Spinal muscular atrophy-3<br>Spinal muscular atrophy-4 |
|           |                |                 | NAIP   | 600355 | NLR family, apoptosis inhibitory protein                                                             |                                                                                                                  |
|           |                |                 | GTF2H2 | 601748 | general transcription factor IIH, polypeptide 2, 44kDa                                               |                                                                                                                  |

|  | Yq11.223 | deletion |         |        |                                                                                                                                                                                                                                |  |
|--|----------|----------|---------|--------|--------------------------------------------------------------------------------------------------------------------------------------------------------------------------------------------------------------------------------|--|
|  |          |          | RBMV1A1 | 400006 | This gene encodes a protein containing an RNA-binding motif in the N-terminus and four SRGY (serine, arginine, glycine, tyrosine) boxes in the C-terminus.                                                                     |  |
|  |          |          | PRY2    | 400041 | This gene is located in the nonrecombining portion of the Y chromosome, and expressed specifically in testis. It encodes a protein which has a low degree of similarity to protein tyrosine phosphatase, non-receptor type 13. |  |
|  |          |          | TTY5    | 400038 | testis-specific transcript, Y-linked 5 (non-protein coding)                                                                                                                                                                    |  |
|  |          |          | TTY6    | 400039 | testis-specific transcript, Y-linked 6 (non-protein coding)                                                                                                                                                                    |  |
|  |          |          | PRY     | 400019 | This gene is located in the nonrecombining portion of the Y chromosome, and expressed specifically in testis. It encodes a                                                                                                     |  |

|           |             |                 |        |        |                                                                                                                                    |                             |
|-----------|-------------|-----------------|--------|--------|------------------------------------------------------------------------------------------------------------------------------------|-----------------------------|
|           |             |                 |        |        | protein which has a low degree of similarity to protein tyrosine phosphatase, non-receptor type 13.                                |                             |
|           |             |                 | TTY17A | 400040 | testis-specific transcript, Y-linked 17A (non-protein coding)                                                                      |                             |
|           |             |                 | TTY4   | 400037 | testis-specific transcript, Y-linked 4 (non-protein coding)                                                                        |                             |
|           |             |                 | BPY2   | 400013 | basic charge, Y-linked, 2                                                                                                          |                             |
|           |             |                 | DAZ1   | 400003 | This gene is a member of the DAZ gene family and is a candidate for the human Y-chromosomal azoospermia factor (AZF).              | ?Sertoli-cell-only syndrome |
|           |             |                 | DAZ2   | 400026 | This gene is a member of the DAZ gene family and is a candidate for the human Y-chromosomal azoospermia factor (AZF).              |                             |
| <b>53</b> | <b>1q44</b> | <b>deletion</b> |        |        |                                                                                                                                    |                             |
|           |             |                 | SMYD3  | 608783 | This gene encodes a histone methyltransferase which functions in RNA polymerase II complexes by an interaction with a specific RNA |                             |



|  |      |          |        |        |                                                                                                                                                  |                                                                                             |
|--|------|----------|--------|--------|--------------------------------------------------------------------------------------------------------------------------------------------------|---------------------------------------------------------------------------------------------|
|  |      |          |        |        | helicase.                                                                                                                                        |                                                                                             |
|  |      |          | TFB2M  | 607055 | transcription factor B2, mitochondrial                                                                                                           |                                                                                             |
|  |      |          | CNST   | 613439 | consortin, connexin sorting protein                                                                                                              |                                                                                             |
|  |      |          | AHCTF1 | 610853 | AT hook containing transcription factor 1                                                                                                        |                                                                                             |
|  |      |          | ZNF124 | 194631 | This gene encodes a member of the Kruppel-type (C2H2) zinc finger protein family.                                                                |                                                                                             |
|  |      |          | ZNF496 | 613911 | zinc finger protein 496                                                                                                                          |                                                                                             |
|  |      |          | NLRP3  | 606416 | This gene encodes a pyrin-like protein containing a pyrin domain, a nucleotide-binding site (NBS) domain, and a leucine-rich repeat (LRR) motif. | CINCA syndrome<br>Cold-induced autoinflammatory syndrome, familial<br>Muckle-Wells syndrome |
|  |      |          | OR13G1 | 611677 | olfactory receptor, family 13, subfamily G, member 1                                                                                             |                                                                                             |
|  | 6q26 | deletion |        |        |                                                                                                                                                  |                                                                                             |
|  |      |          | QKI    | 609590 | The protein encoded by this gene is an RNA-binding protein that regulates pre-mRNA splicing, export of mRNAs                                     |                                                                                             |

|  |               |             |        |        |                                                                                                                                                                                                 |  |
|--|---------------|-------------|--------|--------|-------------------------------------------------------------------------------------------------------------------------------------------------------------------------------------------------|--|
|  |               |             |        |        | from the nucleus, protein translation, and mRNA stability.                                                                                                                                      |  |
|  | 16p13.3p13.12 | duplication |        |        |                                                                                                                                                                                                 |  |
|  |               |             | POLR3K | 606007 | This gene encodes a small essential subunit of RNA polymerase III, the polymerase responsible for synthesizing transfer and small ribosomal RNAs in eukaryotes.                                 |  |
|  |               |             | MPG    | 156565 | N-methylpurine-DNA glycosylase                                                                                                                                                                  |  |
|  |               |             | NPRL3  | 600928 | The function of the encoded protein is not known.                                                                                                                                               |  |
|  |               |             | HBZ    | 142310 | Zeta-globin is an alpha-like hemoglobin.<br><br>The zeta-globin polypeptide is synthesized in the yolk sac of the early embryo, while alpha-globin is produced throughout fetal and adult life. |  |
|  |               |             | HBM    | 609639 | hemoglobin, mu                                                                                                                                                                                  |  |

|  |  |  |       |        |                                                                                                                     |                                                                                                                                                      |
|--|--|--|-------|--------|---------------------------------------------------------------------------------------------------------------------|------------------------------------------------------------------------------------------------------------------------------------------------------|
|  |  |  | HBA2  | 141850 | hemoglobin, alpha 2                                                                                                 | Erythrocytosis<br>Heinz body anemia<br>Hemoglobin H disease,<br>nondeletional<br>Hypochromic microcytic<br>anemia<br>Thalassemia, alpha-             |
|  |  |  | HBA1  | 141800 | hemoglobin, alpha 1                                                                                                 | Erythremias, alpha-<br>Heinz body anemias, alpha-<br>Hemoglobin H disease,<br>nondeletional<br>Methemoglobinemias,<br>alpha-<br>Thalassemias, alpha- |
|  |  |  | HBQ1  | 142240 | Theta-globin mRNA is found in human fetal erythroid tissue but not in adult erythroid or other nonerythroid tissue. |                                                                                                                                                      |
|  |  |  | LUC7L | 607782 | LUC7-like ( <i>S. cerevisiae</i> )                                                                                  |                                                                                                                                                      |
|  |  |  | RGS11 | 603895 | This protein inhibits signal transduction by increasing the                                                         |                                                                                                                                                      |

|  |  |           |        |                                                                                                                                                           |                                                                 |
|--|--|-----------|--------|-----------------------------------------------------------------------------------------------------------------------------------------------------------|-----------------------------------------------------------------|
|  |  |           |        | GTPase activity of G protein alpha subunits, thereby driving them into their inactive GDP-bound form.                                                     |                                                                 |
|  |  | ARHGDIG   | 602844 | Rho GDP dissociation inhibitor (GDI) gamma                                                                                                                |                                                                 |
|  |  | PDIA2     | 608012 | protein disulfide isomerase family A, member 2                                                                                                            |                                                                 |
|  |  | AXIN1     | 603816 | This gene encodes a cytoplasmic protein which contains a regulation of G-protein signaling (RGS) domain and a dishevelled and axin (DIX) domain.          | Caudal duplication anomaly<br>Hepatocellular carcinoma, somatic |
|  |  | MRPL28    | 604853 | This gene encodes a 39S subunit protein, a part of which was originally isolated by its ability to recognize tyrosinase in an HLA-A24-restricted fashion. |                                                                 |
|  |  | NME4      | 601818 | non-metastatic cells 4, protein expressed in                                                                                                              |                                                                 |
|  |  | RAB11FIP3 | 608738 | RAB11 family interacting protein 3 (class II)                                                                                                             |                                                                 |

|  |  |  |         |        |                                                                                                                                                                                              |  |
|--|--|--|---------|--------|----------------------------------------------------------------------------------------------------------------------------------------------------------------------------------------------|--|
|  |  |  | SOLH    | 603267 | This gene encodes a protein containing zinc-finger-like repeats and a calpain-like protease domain.                                                                                          |  |
|  |  |  | PIGQ    | 605754 | This gene is involved in the first step in glycosylphosphatidylinositol (GPI)-anchor biosynthesis.                                                                                           |  |
|  |  |  | WFIKKN1 | 608021 | This gene encodes a secreted multidomain protein consisting of a signal peptide, a WAP domain, a follistatin domain, an immunoglobulin domain, two tandem Kunitz domains, and an NTR domain. |  |
|  |  |  | RHOT2   | 613889 | This gene encodes a member of the Rho family of GTPases.                                                                                                                                     |  |
|  |  |  | RHBDL1  | 603264 | rhomboid, veinlet-like 1 (Drosophila)                                                                                                                                                        |  |
|  |  |  | STUB1   | 607207 | STUB1, or CHIP, is a ubiquitin ligase/cochaperone that participates in protein quality control by targeting a broad range of chaperone protein substrates for degradation                    |  |
|  |  |  | FBXL16  | 609082 | F-box and leucine-rich repeat protein                                                                                                                                                        |  |

|  |  |  |        |        |                                                                                                                                                                                                                      |  |
|--|--|--|--------|--------|----------------------------------------------------------------------------------------------------------------------------------------------------------------------------------------------------------------------|--|
|  |  |  |        |        | 16                                                                                                                                                                                                                   |  |
|  |  |  | METRN  | 610998 | Meteorin regulates glial cell differentiation and promotes the formation of axonal networks during neurogenesis                                                                                                      |  |
|  |  |  | NARFL  | 611118 | nuclear prelamin A recognition factor-like                                                                                                                                                                           |  |
|  |  |  | MSLN   | 601051 | This gene encodes a precursor protein that is cleaved into two products, megakaryocyte potentiating factor and mesothelin.                                                                                           |  |
|  |  |  | CHTF18 | 613201 | CHTF18, CHTF8 (MIM 613202), and DCC1 (DSCC1; MIM 613203) are components of an alternative replication factor C (RFC) (see MIM 600404) complex that loads PCNA (MIM 176740) onto DNA during S phase of the cell cycle |  |
|  |  |  | GNG13  | 607298 | Heterotrimeric G proteins, which consist of alpha (see MIM 139320),                                                                                                                                                  |  |

|  |  |  |       |                                                                                                                                      |                                                                                                                                                                                            |                                    |
|--|--|--|-------|--------------------------------------------------------------------------------------------------------------------------------------|--------------------------------------------------------------------------------------------------------------------------------------------------------------------------------------------|------------------------------------|
|  |  |  |       | beta (see MIM 139380), and gamma subunits, function as signal transducers for the 7-transmembrane-helix G protein-coupled receptors. |                                                                                                                                                                                            |                                    |
|  |  |  | LMF1  | 611761                                                                                                                               | The protein encoded by this gene resides in the endoplasmic reticulum, and is involved in the maturation and transport of lipoprotein lipase through the secretory pathway.                | Lipase deficiency, combined        |
|  |  |  | SOX8  | 605923                                                                                                                               | This gene encodes a member of the SOX (SRY-related HMG-box) family of transcription factors involved in the regulation of embryonic development and in the determination of the cell fate. |                                    |
|  |  |  | SSTR5 | 182455                                                                                                                               | The protein encoded by this gene is one of the SSTRs, which is a multi-pass membrane protein and belongs to the G-protein coupled receptor 1 family.                                       | Somatostatin analog, resistance to |

|  |  |  |         |        |                                                                                                                                                                                                                                       |                                                                                                                         |
|--|--|--|---------|--------|---------------------------------------------------------------------------------------------------------------------------------------------------------------------------------------------------------------------------------------|-------------------------------------------------------------------------------------------------------------------------|
|  |  |  | C1QTNF8 | 614147 | C1q and tumor necrosis factor related protein 8                                                                                                                                                                                       |                                                                                                                         |
|  |  |  | CACNA1H | 607904 | This gene encodes a T-type member of the alpha-1 subunit family, a protein in the voltage-dependent calcium channel complex.                                                                                                          | 16p13.3 {Epilepsy, childhood absence, susceptibility to, 6}<br>{Epilepsy, idiopathic generalized, susceptibility to, 6} |
|  |  |  | TPSG1   | 609341 | Tryptases comprise a family of trypsin-like serine proteases, the peptidase family S1. Tryptases are enzymatically active only as heparin-stabilized tetramers, and they are resistant to all known endogenous proteinase inhibitors. |                                                                                                                         |
|  |  |  | TPSB2   | 191081 | tryptase beta 2 (gene/pseudogene)                                                                                                                                                                                                     |                                                                                                                         |
|  |  |  | TPSAB1  | 191080 | tryptase alpha/beta 1                                                                                                                                                                                                                 |                                                                                                                         |
|  |  |  | TPSD1   | 609272 | tryptase delta 1                                                                                                                                                                                                                      |                                                                                                                         |
|  |  |  | UBE2I   | 601661 | This gene encodes a member of the                                                                                                                                                                                                     |                                                                                                                         |



|  |  |  |          |        |                                                                                                                                                                     |                                                                             |
|--|--|--|----------|--------|---------------------------------------------------------------------------------------------------------------------------------------------------------------------|-----------------------------------------------------------------------------|
|  |  |  |          |        | E2 ubiquitin-conjugating enzyme family.                                                                                                                             |                                                                             |
|  |  |  | BAIAP3   | 604009 | This p53-target gene encodes a brain-specific angiogenesis inhibitor.                                                                                               |                                                                             |
|  |  |  | GNPTG    | 607838 | This gene encodes the gamma subunit of the N-acetylglucosamine-1-phosphotransferase complex.                                                                        | Mucopolipidosis III gamma                                                   |
|  |  |  | CLCN7    | 602727 | The product of this gene belongs to the CLC chloride channel family of proteins.                                                                                    | Osteopetrosis, autosomal dominant 2<br>Osteopetrosis, autosomal recessive 4 |
|  |  |  | C16orf38 | 613442 | pentraxin 4, long                                                                                                                                                   |                                                                             |
|  |  |  | TELO2    | 611140 | This gene encodes a protein that functions as an S-phase checkpoint protein in the cell cycle.                                                                      |                                                                             |
|  |  |  | TMEM204  | 611002 | transmembrane protein 204                                                                                                                                           |                                                                             |
|  |  |  | MAPK8IP3 | 605431 | The protein encoded by this gene shares similarity with the product of Drosophila syd gene, required for the functional interaction of kinesin I with axonal cargo. |                                                                             |

|  |  |  |        |        |                                                                                                                                                                       |                                    |
|--|--|--|--------|--------|-----------------------------------------------------------------------------------------------------------------------------------------------------------------------|------------------------------------|
|  |  |  | NME3   | 601817 | non-metastatic cells 3, protein expressed in                                                                                                                          |                                    |
|  |  |  | MRPS34 | 611994 | This gene encodes a 28S subunit protein.                                                                                                                              |                                    |
|  |  |  | EME2   | 610886 | essential meiotic endonuclease 1 homolog 2 (S. pombe)                                                                                                                 |                                    |
|  |  |  | SPSB3  | 611659 | splA/ryanodine receptor domain and SOCS box containing 3                                                                                                              |                                    |
|  |  |  | NUBP2  | 610779 | nucleotide binding protein 2                                                                                                                                          |                                    |
|  |  |  | IGFALS | 601489 | The protein encoded by this gene is a serum protein that binds insulin-like growth factors, increasing their half-life and their vascular localization.               | Acid-labile subunit, deficiency of |
|  |  |  | HAGH   | 138760 | The enzyme encoded by this gene is classified as a thiolesterase and is responsible for the hydrolysis of S-lactoyl-glutathione to reduced glutathione and D-lactate. | [Glyoxalase II deficiency]         |
|  |  |  | SEPX1  | 606216 | This gene encodes a selenoprotein, which contains a selenocysteine (Sec) residue at its active site.                                                                  |                                    |

|  |  |  |          |        |                                                                                                                                                                      |                                                                                                      |
|--|--|--|----------|--------|----------------------------------------------------------------------------------------------------------------------------------------------------------------------|------------------------------------------------------------------------------------------------------|
|  |  |  | NDUFB10  | 603843 | NADH dehydrogenase (ubiquinone) 1 beta subcomplex, 10, 22kDa                                                                                                         |                                                                                                      |
|  |  |  | RPS2     | 603624 | ribosomal protein S2                                                                                                                                                 |                                                                                                      |
|  |  |  | TBL3     | 605915 | The protein encoded by this gene has sequence similarity with members of the WD40 repeat-containing protein family.                                                  |                                                                                                      |
|  |  |  | NOXO1    | 611256 | NADPH oxidase organizer 1                                                                                                                                            |                                                                                                      |
|  |  |  | GFER     | 600924 | growth factor, augments liver regeneration                                                                                                                           | Myopathy, mitochondrial progressive, with congenital cataract, hearing loss, and developmental delay |
|  |  |  | SYNGR3   | 603927 | This gene encodes an integral membrane protein.                                                                                                                      |                                                                                                      |
|  |  |  | NPW      | 607997 | The product of this gene is processed into 23- and 30-amino acid neuropeptides that bind and activate two G-protein coupled receptors in the central nervous system. |                                                                                                      |
|  |  |  | SLC9A3R2 | 606553 | This gene encodes a member of the NHERF family of PDZ scaffolding                                                                                                    |                                                                                                      |

|  |  |  |         |        |                                                                                                                                                                                                                                                                                     |                                                           |
|--|--|--|---------|--------|-------------------------------------------------------------------------------------------------------------------------------------------------------------------------------------------------------------------------------------------------------------------------------------|-----------------------------------------------------------|
|  |  |  |         |        | proteins. These proteins mediate many cellular processes by binding to and regulating the membrane expression and protein-protein interactions of membrane receptors and transport proteins.                                                                                        |                                                           |
|  |  |  | NTHL1   | 602656 | The protein encoded by this gene is a DNA N-glycosylase of the endonuclease III family. Like a similar protein in E. coli, the encoded protein has DNA glycosylase activity on DNA substrates containing oxidized pyrimidine residues and has apurinic/apyrimidinic lyase activity. |                                                           |
|  |  |  | TSC2    | 191092 | The protein associates with hamartin in a cytosolic complex, possibly acting as a chaperone for hamartin.                                                                                                                                                                           | Lymphangi leiomyomatosis, somatic<br>Tuberous sclerosis-2 |
|  |  |  | MIR1225 | 611621 | microRNA 1225                                                                                                                                                                                                                                                                       |                                                           |
|  |  |  | PKD1    | 601313 | This gene encodes a member of the polycystin protein family.                                                                                                                                                                                                                        | Polycystic kidney disease, adult type I                   |

|  |  |  |          |        |                                                                                                                                                                                |  |
|--|--|--|----------|--------|--------------------------------------------------------------------------------------------------------------------------------------------------------------------------------|--|
|  |  |  | RAB26    | 605455 | Members of the RAB protein family, including RAB26, are important regulators of vesicular fusion and trafficking.                                                              |  |
|  |  |  | TRAF7    | 606692 | Tumor necrosis factor (TNF; see MIM 191160) receptor-associated factors, such as TRAF7, are signal transducers for members of the TNF receptor superfamily (see MIM 191190).   |  |
|  |  |  | CASKIN1  | 612184 | CASK interacting protein 1                                                                                                                                                     |  |
|  |  |  | MLST8    | 612190 | MTOR associated protein, LST8 homolog ( <i>S. cerevisiae</i> )                                                                                                                 |  |
|  |  |  | PGP      | 172280 | phosphoglycolate phosphatase                                                                                                                                                   |  |
|  |  |  | E4F1     | 603022 | The zinc finger protein encoded by this gene is one of several cellular transcription factors whose DNA-binding activities are regulated through the action of adenovirus E1A. |  |
|  |  |  | DNASE1L2 | 602622 | deoxyribonuclease I-like 2                                                                                                                                                     |  |

|  |  |  |         |        |                                                                                                                                                                                |                                         |
|--|--|--|---------|--------|--------------------------------------------------------------------------------------------------------------------------------------------------------------------------------|-----------------------------------------|
|  |  |  | DCI     | 600305 | This gene encodes a member of the hydratase/isomerase superfamily.<br>The protein encoded is a key mitochondrial enzyme involved in beta-oxidation of unsaturated fatty acids. |                                         |
|  |  |  | RNPS1   | 606447 | This gene encodes a protein that is part of a post-splicing multiprotein complex involved in both mRNA nuclear export and mRNA surveillance.                                   |                                         |
|  |  |  | CCNF    | 600227 | This gene encodes a member of the cyclin family.                                                                                                                               |                                         |
|  |  |  | NTN3    | 602349 | netrin 3                                                                                                                                                                       |                                         |
|  |  |  | TBC1D24 | 613577 | This gene encodes a protein with a conserved domain, referred to as the TBC domain, characteristic of proteins which interact with GTPases.                                    | Myoclonic epilepsy, infantile, familial |
|  |  |  | ATP6V0C | 108745 | This gene encodes a component of vacuolar ATPase (V-ATPase), a multisubunit enzyme that mediates                                                                               |                                         |

|  |  |  |        |                                                       |                                                                                                                         |
|--|--|--|--------|-------------------------------------------------------|-------------------------------------------------------------------------------------------------------------------------|
|  |  |  |        | acidification of eukaryotic intracellular organelles. |                                                                                                                         |
|  |  |  | CEMP1  | 611113                                                | cementum protein 1                                                                                                      |
|  |  |  | PDPK1  | 605213                                                | 3-phosphoinositide dependent protein kinase-1                                                                           |
|  |  |  | KCTD5  | 611285                                                | potassium channel tetramerisation domain containing 5                                                                   |
|  |  |  | PRSS27 | 608018                                                | protease, serine 27                                                                                                     |
|  |  |  | SRRM2  | 606032                                                | serine/arginine repetitive matrix 2                                                                                     |
|  |  |  | TCEB2  | 600787                                                | This gene encodes the protein elongin B, which is a subunit of the transcription factor B (SIII) complex.               |
|  |  |  | PRSS33 | 613797                                                | protease, serine, 33                                                                                                    |
|  |  |  | PRSS21 | 608159                                                | This gene encodes a cell-surface anchored serine protease, which is a member of the trypsin family of serine proteases. |
|  |  |  | PRSS22 | 609343                                                | This gene encodes a member of the trypsin family of serine proteases.<br>The enzyme is expressed in the                 |

|  |  |  |               |                                                |                                                                                                                                                                                                                                                          |
|--|--|--|---------------|------------------------------------------------|----------------------------------------------------------------------------------------------------------------------------------------------------------------------------------------------------------------------------------------------------------|
|  |  |  |               | airways in a developmentally regulated manner. |                                                                                                                                                                                                                                                          |
|  |  |  | KREMEN2       | 609899                                         | This gene encodes a high-affinity dickkopf homolog 1 (DKK1) transmembrane receptor. A similar protein in mouse functions interacts with with DKK1 to block wingless (WNT)/beta-catenin signaling.                                                        |
|  |  |  | PKMYT1        | 602474                                         | The protein encoded by this gene is a member of the serine/threonine protein kinase family.                                                                                                                                                              |
|  |  |  | TNFRSF12<br>A | 605914                                         | tumor necrosis factor receptor superfamily, member 12A                                                                                                                                                                                                   |
|  |  |  | MMP25         | 608482                                         | Proteins of the matrix metalloproteinase (MMP) family are involved in the breakdown of extracellular matrix in normal physiological processes, such as embryonic development, reproduction, and tissue remodeling, as well as in disease processes, such |



|  |  |  |        |        |                                                                                                                                           |                                                                      |
|--|--|--|--------|--------|-------------------------------------------------------------------------------------------------------------------------------------------|----------------------------------------------------------------------|
|  |  |  |        |        | as arthritis and metastasis.                                                                                                              |                                                                      |
|  |  |  | IL32   | 606001 | This gene encodes a member of the cytokine family.                                                                                        |                                                                      |
|  |  |  | ZNF205 | 603436 | zinc finger protein 205                                                                                                                   |                                                                      |
|  |  |  | ZNF213 | 608387 | zinc finger protein 213                                                                                                                   |                                                                      |
|  |  |  | OR1F1  | 603232 | Olfactory receptors interact with odorant molecules in the nose, to initiate a neuronal response that triggers the perception of a smell. |                                                                      |
|  |  |  | ZNF200 | 603231 | zinc finger protein 200                                                                                                                   |                                                                      |
|  |  |  | MEFV   | 608107 | This gene encodes a protein, also known as pyrin or marenostrin, that is an important modulator of innate immunity.                       | Familial Mediterranean fever, AD<br>Familial Mediterranean fever, AR |
|  |  |  | ZNF263 | 604191 | zinc finger protein 263                                                                                                                   |                                                                      |
|  |  |  | TIGD7  | 612969 | The protein encoded by this gene belongs to the tigger subfamily of the pogo superfamily of DNA-mediated transposons in humans.           |                                                                      |
|  |  |  | ZNF75A | 601473 | zinc finger protein 75a                                                                                                                   |                                                                      |

|  |  |  |        |        |                                                                                                                                                                                            |                                                   |
|--|--|--|--------|--------|--------------------------------------------------------------------------------------------------------------------------------------------------------------------------------------------|---------------------------------------------------|
|  |  |  | ZNF174 | 603900 | zinc finger protein 174                                                                                                                                                                    |                                                   |
|  |  |  | NAA60  | 614246 | N(alpha)-acetyltransferase 60, NatF catalytic subunit                                                                                                                                      |                                                   |
|  |  |  | SLX4   | 613278 | This gene encodes a structure-specific endonuclease subunit.                                                                                                                               | Fanconi anemia, complementation group P           |
|  |  |  | DNASE1 | 125505 | This gene encodes a member of the DNase family.                                                                                                                                            | {Systemic lupus erythematosus, susceptibility to} |
|  |  |  | TRAP1  | 606219 | TRAP1 is a mitochondrial HSP90 protein.                                                                                                                                                    |                                                   |
|  |  |  | CREBBP | 600140 | The protein encoded by this gene has intrinsic histone acetyltransferase activity and also acts as a scaffold to stabilize additional protein interactions with the transcription complex. | Rubinstein-Taybi syndrome                         |
|  |  |  | ADCY9  | 603302 | Adenylate cyclase is a membrane bound enzyme that catalyses the formation of cyclic AMP from ATP.                                                                                          |                                                   |
|  |  |  | SRL    | 604992 | sarcalumenin                                                                                                                                                                               |                                                   |
|  |  |  | TFAP4  | 600743 | transcription factor AP-4 (activating                                                                                                                                                      |                                                   |

|  |  |  |         |                             |                                                                                                                                                                                                                  |                    |
|--|--|--|---------|-----------------------------|------------------------------------------------------------------------------------------------------------------------------------------------------------------------------------------------------------------|--------------------|
|  |  |  |         | enhancer binding protein 4) |                                                                                                                                                                                                                  |                    |
|  |  |  | GLIS2   | 608539                      | This gene is a member of the GLI-similar zinc finger protein family and encodes a nuclear transcription factor with five C2H2-type zinc finger domains.                                                          | Nephronophthisis 7 |
|  |  |  | VASN    | 608843                      | vasorin                                                                                                                                                                                                          |                    |
|  |  |  | CORO7   | 611668                      | coronin 7                                                                                                                                                                                                        |                    |
|  |  |  | DNAJA3  | 608382                      | This gene encodes a member of the DNAJ/Hsp40 protein family.                                                                                                                                                     |                    |
|  |  |  | HMOX2   | 141251                      | Heme oxygenase, an essential enzyme in heme catabolism, cleaves heme to form biliverdin, which is subsequently converted to bilirubin by biliverdin reductase, and carbon monoxide, a putative neurotransmitter. |                    |
|  |  |  | C16orf5 | 610503                      | hromosome 16 open reading frame 5                                                                                                                                                                                |                    |
|  |  |  | MGRN1   | 607559                      | mahogunin ring finger 1, E3 ubiquitin protein ligase                                                                                                                                                             |                    |
|  |  |  | SEPT12  | 611562                      | This gene encodes a guanine-                                                                                                                                                                                     |                    |

|  |  |  |        |        |                                                                                                                                                     |                                                           |
|--|--|--|--------|--------|-----------------------------------------------------------------------------------------------------------------------------------------------------|-----------------------------------------------------------|
|  |  |  |        |        | nucleotide binding protein and member of the septin family of cytoskeletal GTPases.                                                                 |                                                           |
|  |  |  | GLYR1  | 610660 | glyoxylate reductase 1 homolog (Arabidopsis)                                                                                                        |                                                           |
|  |  |  | UBN1   | 609771 | ubiquitin 1                                                                                                                                         |                                                           |
|  |  |  | PPL    | 602871 | The protein encoded by this gene is a component of desmosomes and of the epidermal cornified envelope in keratinocytes.                             |                                                           |
|  |  |  | NAGPA  | 607985 | This gene encodes the enzyme that catalyzes the second step in the formation of the mannose 6-phosphate recognition marker on lysosomal hydrolases. |                                                           |
|  |  |  | ALG1   | 605907 | The enzyme encoded by this gene catalyzes the first mannosylation step in the biosynthesis of lipid-linked oligosaccharides.                        | Congenital disorder of glycosylation, type I <sub>k</sub> |
|  |  |  | RBFOX1 | 605104 | The protein binds to the C-terminus of ataxin-2 and may contribute to the                                                                           |                                                           |

|  |  |  |         |        |                                                                                                                                                                                                                      |                                               |
|--|--|--|---------|--------|----------------------------------------------------------------------------------------------------------------------------------------------------------------------------------------------------------------------|-----------------------------------------------|
|  |  |  |         |        | restricted pathology of spinocerebellar ataxia type 2 (SCA2).                                                                                                                                                        |                                               |
|  |  |  | TMEM114 | 611579 | transmembrane protein 114                                                                                                                                                                                            |                                               |
|  |  |  | ABAT    | 137150 | 4-aminobutyrate aminotransferase (ABAT) is responsible for catabolism of gamma-aminobutyric acid (GABA), an important, mostly inhibitory neurotransmitter in the central nervous system, into succinic semialdehyde. | GABA-transaminase deficiency                  |
|  |  |  | PMM2    | 601785 | The protein encoded by this gene catalyzes the isomerization of mannose 6-phosphate to mannose 1-phosphate, which is a precursor to GDP-mannose necessary for the synthesis of dolichol-P-oligosaccharides.          | Congenital disorder of glycosylation, type Ia |
|  |  |  | USP7    | 602519 | ubiquitin specific peptidase 7 (herpes virus-associated)                                                                                                                                                             |                                               |
|  |  |  | GRIN2A  | 138253 | N-methyl-D-aspartate (NMDA) receptors are a class of ionotropic                                                                                                                                                      | Epilepsy with neurodevelopmental defects      |

|  |  |  |         |        |                                                                                                                                                |                                                                                                                  |
|--|--|--|---------|--------|------------------------------------------------------------------------------------------------------------------------------------------------|------------------------------------------------------------------------------------------------------------------|
|  |  |  |         |        | glutamate-gated ion channels.                                                                                                                  |                                                                                                                  |
|  |  |  | ATF7IP2 | 613645 | activating transcription factor 7<br>interacting protein 2                                                                                     |                                                                                                                  |
|  |  |  | EMP2    | 602334 | epithelial membrane protein 2                                                                                                                  |                                                                                                                  |
|  |  |  | NUBP1   | 600280 | nucleotide binding protein 1                                                                                                                   |                                                                                                                  |
|  |  |  | CIITA   | 600005 | This gene encodes a protein with an<br>acidic transcriptional activation<br>domain, 4 LRRs (leucine-rich<br>repeats) and a GTP binding domain. | Bare lymphocyte syndrome,<br>type II, complementation<br>group A<br>{Rheumatoid arthritis,<br>susceptibility to} |
|  |  |  | CLEC16A | 611303 | This gene encodes a member of the<br>C-type lectin domain containing<br>family.                                                                |                                                                                                                  |
|  |  |  | SOCS1   | 603597 | This gene encodes a member of the<br>STAT-induced STAT inhibitor (SSI),<br>also known as suppressor of cytokine<br>signaling (SOCS), family.   |                                                                                                                  |
|  |  |  | TNP2    | 190232 | transition protein 2 (during histone to<br>protamine replacement)                                                                              |                                                                                                                  |
|  |  |  | PRM2    | 182890 | Protamines are the major DNA-<br>binding proteins in the nucleus of                                                                            |                                                                                                                  |

|  |  |  |          |                                                                               |                                                                                                                                                                        |                                      |
|--|--|--|----------|-------------------------------------------------------------------------------|------------------------------------------------------------------------------------------------------------------------------------------------------------------------|--------------------------------------|
|  |  |  |          | sperm, and package the DNA in a volume less than 5% of a somatic cell nucleus |                                                                                                                                                                        |                                      |
|  |  |  | PRM1     | 182880                                                                        | protamine 1                                                                                                                                                            |                                      |
|  |  |  | RMI2     | 612426                                                                        | RMI2, RecQ mediated genome instability 2, homolog ( <i>S. cerevisiae</i> )                                                                                             |                                      |
|  |  |  | LITAF    | 603795                                                                        | Lipopolysaccharide is a potent stimulator of monocytes and macrophages, causing secretion of tumor necrosis factor-alpha (TNF-alpha) and other inflammatory mediators. | Charcot-Marie-Tooth disease, type 1C |
|  |  |  | SNN      | 603032                                                                        | stannin                                                                                                                                                                |                                      |
|  |  |  | BCAR4    | 613746                                                                        | breast cancer anti-estrogen resistance 4 (non-protein coding)                                                                                                          |                                      |
|  |  |  | GSPT1    | 139259                                                                        | G1 to S phase transition 1                                                                                                                                             |                                      |
|  |  |  | TNFRSF17 | 109545                                                                        | The protein encoded by this gene is a member of the TNF-receptor superfamily.                                                                                          |                                      |
|  |  |  | SHISA9   | 613346                                                                        | shisa homolog 9 ( <i>Xenopus laevis</i> )                                                                                                                              |                                      |
|  |  |  | ERCC4    | 133520                                                                        | The protein encoded by this gene                                                                                                                                       | Xeroderma pigmentosum,               |

|  |         |          |         |        |                                                                                                                                                                                       |                                   |
|--|---------|----------|---------|--------|---------------------------------------------------------------------------------------------------------------------------------------------------------------------------------------|-----------------------------------|
|  |         |          |         |        | forms a complex with ERCC1 and is involved in the 5' incision made during nucleotide excision repair.                                                                                 | group F<br>XFE progeroid syndrome |
|  |         |          | MKL2    | 609463 | MKL/myocardin-like 2                                                                                                                                                                  |                                   |
|  | Xp22.31 | deletion |         |        |                                                                                                                                                                                       |                                   |
|  |         |          | STS     | 300747 | The protein encoded by this gene catalyzes the conversion of sulfated steroid precursors to estrogens during pregnancy.                                                               |                                   |
|  | Xq12    | deletion |         |        |                                                                                                                                                                                       |                                   |
|  |         |          | OPHN1   | 300127 | This gene encodes a Rho-GTPase-activating protein that promotes GTP hydrolysis of Rho subfamily members.                                                                              |                                   |
|  | Xq22.3  | deletion |         |        |                                                                                                                                                                                       |                                   |
|  |         |          | AMMECR1 | 300195 | The exact function of this gene is not known, however, submicroscopic deletion of the X chromosome including this gene, COL4A5, and FACL4 genes, result in a contiguous gene deletion |                                   |



|           |               |                    |      |        |                                                                                                                                                                                                                                                                                                                                                                                                                                                                                                                                                                   |                                                                        |
|-----------|---------------|--------------------|------|--------|-------------------------------------------------------------------------------------------------------------------------------------------------------------------------------------------------------------------------------------------------------------------------------------------------------------------------------------------------------------------------------------------------------------------------------------------------------------------------------------------------------------------------------------------------------------------|------------------------------------------------------------------------|
|           |               |                    |      |        | syndrome, the AMME complex (Alport syndrome, mental retardation, midface hypoplasia, and elliptocytosis).                                                                                                                                                                                                                                                                                                                                                                                                                                                         |                                                                        |
| <b>54</b> | <b>6p12.3</b> | <b>duplication</b> |      |        |                                                                                                                                                                                                                                                                                                                                                                                                                                                                                                                                                                   |                                                                        |
|           |               |                    | EYA4 | 603550 | <p>This gene encodes a member of the eyes absent (EYA) family of proteins. The encoded protein may act as a transcriptional activator through its protein phosphatase activity, and it may be important for eye development, and for continued function of the mature organ of Corti. Mutations in this gene are associated with postlingual, progressive, autosomal dominant hearing loss at the deafness, autosomal dominant nonsyndromic sensorineural 10 locus. Defects in this gene are also associated with dilated cardiomyopathy 1J. Three transcript</p> | <p>Cardiomyopathy, dilated, 1J<br/>Deafness, autosomal dominant 10</p> |

|  |         |          |         |        |                                                                                                                                                                                                                                                                                                                                                                                                                                                                                            |  |
|--|---------|----------|---------|--------|--------------------------------------------------------------------------------------------------------------------------------------------------------------------------------------------------------------------------------------------------------------------------------------------------------------------------------------------------------------------------------------------------------------------------------------------------------------------------------------------|--|
|  |         |          |         |        | variants encoding distinct isoforms have been identified for this gene.<br>[provided by RefSeq, Jul 2008]                                                                                                                                                                                                                                                                                                                                                                                  |  |
|  | Xp22.12 | deletion |         |        |                                                                                                                                                                                                                                                                                                                                                                                                                                                                                            |  |
|  |         |          | SH3KBP1 | 300374 | This gene encodes an adapter protein that contains three N-terminal Src homology domains, a proline rich region and a C-terminal coiled-coil domain. The encoded protein facilitates protein-protein interactions and has been implicated in numerous cellular processes including apoptosis, cytoskeletal rearrangement, cell adhesion and in the regulation of clathrin-dependent endocytosis. Alternate splicing results in multiple transcript variants.[provided by RefSeq, May 2010] |  |
